# Supplementary material for: The Transcription Factor Mrr1p Controls Expression of the MDR1 Efflux Pump and Mediates Multidrug Resistance in Candida albicans
Source: PLOS journal article supplement (doi:10.1371/journal.ppat.0030164), 2007-10-29
Supplement: S1 (10.1371/journal.ppat.0030164.s001) [file journal.ppat.0030164.st001.xls]

## Sheet: 298 Up
Microarray Probe Name	orf19 Name	GO Annotation (Molecular Function)	F1-1	Flags	F1-2	Flags	F1-3	Flags	F5-1	Flags	F5-2	Flags	F5-3	Flags	F5-1 vs. F1-1	F5-2 vs. F1-2	F5-3 vs. F1-3	G1-1	Flags	G1-2	Flags	G1-3	Flags	G5-1	Flags	G5-2	Flags	G5-3	Flags	G5-1 vs. G1-1	G5-2 vs. G1-2	G5-3 vs. G1-3	5833-1	Flags	5833-2	Flags	5833-3	Flags	6692-1	Flags	6692-2	Flags	6692-3	Flags	6692-1 vs. 5833-1	6692-2 vs. 5833-2	6692-3 vs. 5833-3
AAF1	orf19.7436	--	3.74225	P	5.7156	P	6.10271	P	5.37786	P	7.17666	P	6.13751	P	1.43707	1.25563	1.0057	1.51726	P	1.49898	P	1.48418	P	2.91119	P	3.13507	P	3.28855	P	1.91872	2.09146	2.21574	0.896728	P	0.700737	P	0.552598	P	1.05598	P	1.29058	P	0.643243	P	1.1776	1.84175	1.16403
AAH1	orf19.2251	Adenine deaminase activity	0.632231	P	0.433047	P	0.269515	M	0.319847	P	0.264984	P	0.442705	P	-1.97667	-1.63424	1.6426	0.85721	P	0.823709	P	0.414925	P	1.26243	P	1.42826	P	1.0625	P	1.47272	1.73393	2.5607	0.353783	P	0.607735	P	0.212928	A	0.546332	P	0.518036	P	0.645946	P	1.54426	-1.17315	3.03364
ACB1.exon2	orf19.7043	Acyl-CoA binding	0.303202	P	0.22543	P	0.0443714	A	0.296947	P	0.0998949	A	0.218558	P	-1.02107	-2.25667	4.92565	0.706856	P	1.41678	P	0.167164	P	1.14165	P	3.3049	P	1.76497	P	1.61511	2.33269	10.5583	0.299591	P	0.63628	P	0.0823828	A	0.511583	P	0.594188	P	0.160811	P	1.7076	-1.07084	1.952
ADH5	orf19.2608	Alcohol dehydrogenase activity	31.359	P	27.6576	P	20.8714	P	39.8485	P	55.6924	P	21.1029	P	1.28005	1.99758	1.01456	24.4184	P	17.5897	P	18.9946	P	24.5406	P	21.9898	P	17.962	P	-1.00022	1.25979	-1.0705	5.93149	P	6.33103	P	1.68188	P	9.39189	P	11.0045	P	4.79459	P	1.57727	1.7434	2.88714
ALD4	orf19.6306	Aldehyde dehydrogenase (NAD) activity	3.14256	P	3.56941	P	2.95152	P	2.2229	P	3.01472	P	3.65679	P	-1.41372	-1.18399	1.23895	0.968794	P	0.811141	P	1.00836	P	1.40808	P	1.53953	P	1.87987	P	1.45344	1.89798	1.86428	0.582822	P	0.439227	P	0.708492	P	0.682432	P	0.689379	P	0.648649	P	1.17091	1.56953	-1.09226
ALS10	orf19.2355	Cell adhesion molecule binding	51.6315	P	43.2509	P	60.0571	P	63.229	P	71.5237	P	67.4237	P	1.24143	1.67266	1.13703	2.27801	P	2.81182	P	2.68925	P	1.35613	P	1.30966	P	1.34338	P	-1.64773	-1.96862	-1.96557	0.71728	P	0.755525	P	1.31052	A	4.05695	P	4.07665	P	10.7919	P	5.85275	5.33723	8.65375
ALS3.3eoc	orf19.2355	Cell adhesion molecule binding	51.079	P	42.9349	P	58.4634	P	67.0832	P	78.0778	P	71.8178	P	1.31332	1.81852	1.22842	4.09835	P	3.64097	P	4.94627	P	2.82815	P	2.44656	P	3.09169	P	-1.44912	-1.4882	-1.59986	1.07975	P	1.23941	P	0.792142	P	5.3388	P	5.91984	P	14.2568	P	4.94446	4.77633	17.9977
ALS3.5eoc	orf19.1816	Cell adhesion molecule binding	47.8732	P	38.9846	P	61.6015	P	64.6424	P	70.3701	P	74.8591	P	1.35166	1.7966	1.20067	0.805201	P	0.843071	P	2.55851	P	0.724245	P	0.671486	P	0.522268	P	-1.06271	-1.26673	-4.90579	1.32873	P	1.28361	P	1.99176	P	5.65396	P	5.56413	P	12.8209	P	4.09107	4.30504	7.85596
ALS6	orf19.7414	Cell adhesion molecule binding	0.353306	A	0.37715	A	0.221857	A	0.639695	P	1.02839	P	0.661822	P	1.8106	2.72674	2.9831	0.171631	A	0.10394	A	0.080597	A	0.0213144	A	0.01	A	0.01	A	-8.05236	-10.394	-8.0597	0.248466	A	0.232965	P	0.119138	A	0.28861	P	0.264529	M	0.278378	A	1.16157	1.13549	2.3366
AMD21	orf19.5169	Amidase activity	0.670971	P	0.5	P	0.998357	P	0.696183	P	0.754995	P	0.814422	P	1.03758	1.50999	-1.22585	0.266194	A	0.189538	P	0.273433	A	0.469805	P	0.460102	P	0.560629	P	1.7649	2.42749	2.05033	0.269939	P	0.237569	P	0.405577	A	0.289575	P	0.234469	P	0.504054	A	1.07274	-1.01322	1.24281
ARE2	orf19.2248	Sterol O-acyltransferase activity	7.29029	P	2.53317	P	1.7765	P	5.76336	P	5.17561	P	2.82337	P	-1.26494	2.04313	1.58929	4.74657	P	2.90217	P	3.16418	P	7.46048	P	6.20534	P	3.88548	P	1.57176	2.13817	1.22796	1.091	P	1.4825	P	0.363752	P	1.91216	P	2.30361	P	1.08649	P	1.75267	1.55386	2.98689
ARO9	orf19.1237	Aromatic-amino-acid transaminase activity	0.306302	P	0.337838	P	0.0608053	A	0.676336	P	0.788644	P	1.21465	P	2.20807	2.33439	19.976	0.473286	P	0.47962	P	0.431642	P	0.430284	P	0.484261	P	0.505239	P	-1.09994	1.00968	1.17051	0.358896	P	0.326888	P	0.700887	P	0.353282	P	0.335671	P	0.275676	M	-1.01589	1.02687	-2.54243
AUT1	orf19.6020	--	0.397727	P	0.296683	P	0.334429	A	0.267176	P	0.263933	A	0.253214	A	-1.48864	-1.12409	-1.32074	0.266194	P	0.303669	P	0.239403	P	0.423623	P	0.443265	P	0.420659	P	1.59141	1.4597	1.75712	0.563395	P	0.618785	P	0.207858	A	0.451737	P	0.40982	P	0.277027	P	-1.24717	-1.50989	1.33277
CBP1	orf19.7323	Steroid binding	12.6472	P	9.82248	P	12.3829	P	19.6168	P	20.979	P	16.8737	P	1.55108	2.13581	1.36266	5.54373	P	4.15116	P	4.53791	P	8.76776	P	8.34517	P	8.14446	P	1.58156	2.01032	1.79476	4.87628	P	5.31584	P	5.80862	P	7.34266	P	7.73747	P	10.5027	P	1.50579	1.45555	1.80812
CDR11.5f	orf19.918	ATP binding	0.480372	P	0.475123	P	0.634347	P	0.993893	P	1.09253	P	0.859419	P	2.06255	2.28701	1.35841	0.253428	M	0.18767	P	0.33194	P	0.333481	P	0.353221	P	0.264409	P	1.33943	1.8746	-1.2613	0.406953	P	0.379374	P	0.380228	P	0.67278	P	0.854709	P	0.64527	P	1.68589	2.26295	1.69758
CDR12	orf19.2802	ATPase activity	4.13068	P	4.02518	P	1.93426	P	6.83817	P	9.41851	P	3.88876	P	1.65546	2.3399	2.01046	4.23806	P	3.4285	P	3.39522	P	10.2269	P	8.97584	P	9.20153	P	2.38776	2.61551	2.73578	1.34765	P	2.24954	P	1.6033	P	2.79537	P	3.62024	P	1.2527	P	2.07426	1.60932	-1.27987
CFL11	orf19.701	Ferric-chelate reductase activity	0.694215	P	0.772727	P	1.58505	P	1.09542	P	1.2755	P	3.06093	P	1.57793	1.65065	1.93113	0.11253	A	0.030231	A	0.0597015	A	0.0679396	A	0.0183016	A	0.0774701	A	-1.65632	-1.65182	1.29762	0.0552147	A	0.0202578	A	0.0506971	A	0.011583	A	0.0340681	A	0.0540541	A	-4.76687	1.68173	1.06622
CHA12	orf19.1996	L-serine ammonia-lyase activity	9.80553	P	11.1698	P	10.4026	P	7.69962	P	7.31073	P	6.48239	P	-1.26079	-1.4872	-1.61141	0.933333	P	0.869735	P	1.34806	P	0.840586	P	1.05619	P	1.89484	P	-1.08597	1.2196	1.40428	0.790389	P	1.39319	P	0.958809	P	1.29006	P	2.54709	P	2.40135	P	1.68	1.79874	2.66892
Cirt2	orf19.3820	--	0.4375	P	0.250614	P	0.244043	P	0.465649	P	0.348055	P	0.219117	P	1.06434	1.38881	-1.11376	0.130496	P	0.150815	P	0.0764179	P	0.237123	P	0.24817	P	0.135853	P	1.81708	1.64552	1.77777	0.348671	P	0.751381	P	0.627376	P	0.607143	P	0.759519	P	0.47973	P	1.74131	1.01083	-1.30777
CLN2	orf19.1960	Cyclin-dependent protein kinase regulator activity	15.9205	P	15.9638	P	14.9433	P	15.7252	P	21.857	P	20.6719	P	-1.01242	1.36916	1.38335	13.922	P	9.81148	P	12.6316	P	8.45648	P	8.14531	P	3.6119	P	-1.64631	-1.20456	-3.49723	3.71984	P	2.53775	P	3.69202	P	5.64575	P	5.03206	P	7.8027	P	1.51774	1.98288	2.1134
CLN21	orf19.6028	Cyclin-dependent protein kinase regulator activity	0.0754132	A	0.447789	A	0.707477	P	0.540458	P	1.16509	P	1.34433	P	7.16662	2.60187	1.90017	0.0330969	A	0.0105299	A	0.0161194	A	0.0102131	A	0.011347	A	0.0172156	A	-3.24062	1.0776	1.068	0.0122699	A	0.01	A	0.166033	A	0.0173745	A	0.0470942	A	0.37027	A	1.41602	4.70942	2.2301
CRD1	orf19.4784	Copper ion binding	20.8833	P	14.2844	P	12.8258	P	24.3366	P	23.7918	P	11.4634	P	1.16537	1.66558	-1.11885	15.9702	P	8.15251	P	5.54269	P	9.13144	P	12.0652	P	8.44573	P	-1.74893	1.47993	1.52376	1.67485	P	2.67772	P	3.81115	P	2.58784	P	4.19238	P	5.78243	P	1.54512	1.56566	1.51724
CRN1.3f	orf19.6534.2	Actin filament binding	1.41994	P	1.18489	P	0.74774	P	1.10229	P	1.30599	P	0.817775	P	-1.28817	1.10221	1.09366	1.70591	P	1.57711	P	1.19522	P	2.97158	P	2.76794	P	3.2646	P	1.74193	1.75507	2.73137	0.734151	P	0.739411	P	0.795944	P	1.04054	P	1.07014	P	1.07568	P	1.41734	1.44729	1.35145
CTR9	orf19.7067	RNA polymerase II transcription factor activity	0.731921	P	0.855651	P	0.497946	P	0.512214	P	0.433228	P	0.74455	P	-1.42894	-1.97506	1.49524	0.95792	P	1.08933	P	0.988657	P	1.48712	P	1.72474	P	1.88099	P	1.55245	1.5833	1.90257	1.68098	P	1.55157	P	0.904943	P	1.81853	P	1.75651	P	1.92162	P	1.08183	1.13209	2.12347
DAL1	orf19.5454	Allantoinase activity	0.158574	A	0.20086	A	0.0862777	A	0.251145	A	0.241851	A	0.242035	A	1.58377	1.20408	2.8053	0.0893617	A	0.117867	A	0.143881	A	0.242007	P	0.280381	M	0.366766	P	2.70818	2.37879	2.5491	0.0777096	A	0.0930018	M	0.0164766	A	0.15444	P	0.140281	P	0.0810811	A	1.9874	1.50836	4.921
DDR48	orf19.4082	--	19.8515	P	11.6744	P	13.9675	P	37.0225	P	46.5342	P	31.8552	P	1.94232	4.26095	2.34093	1.45674	P	1.00391	P	1.00746	P	1.01643	P	0.832174	P	1.0262	P	-1.39054	-1.10719	1.03174	20.0956	P	10.9323	P	20.1521	P	9.14672	P	8.95741	P	10.3649	P	-2.18744	-1.24864	-1.87683
DFR1	orf19.5142	Dihydrofolate reductase activity	0.335744	P	0.313268	P	0.324569	A	0.440458	P	0.334385	M	0.253773	P	1.31189	1.06741	-1.27897	0.337116	P	0.33288	P	0.235224	P	0.632327	P	0.552709	P	0.486527	P	1.8757	1.66038	2.06836	0.175869	P	0.231123	P	0.334601	A	0.260618	P	0.201403	P	0.195946	P	1.48188	-1.14757	-1.70762
DIP51.5f	orf19.2942	Amino acid permease activity	3.87707	P	5.69779	P	8.38044	P	6.76565	P	14.0074	P	13.5718	P	1.74504	2.45839	1.61946	2.08747	P	4.92018	P	13.9128	P	6.3397	P	4.86859	P	2.20397	P	3.03702	-1.01059	-6.31263	15.1309	P	9.6639	P	13.0925	P	7.6805	P	7.28557	P	13.2108	P	-1.97004	-1.32644	1.00903
DLD2	orf19.6755	D-lactate dehydrogenase (cytochrome) activity	0.683884	P	0.775184	P	0.906327	P	0.861832	P	0.95899	P	0.824483	P	1.2602	1.23711	-1.09927	0.199054	A	0.231997	P	0.226269	A	0.571048	P	0.50183	P	0.433009	M	2.8688	2.16309	1.91369	0.379346	P	0.259669	M	0.735108	A	0.437259	P	0.544088	P	0.608108	A	1.15267	2.09532	-1.20884
DPB11	or19.1434	Epsilon DNA polymerase activity	0.298037	P	0.280713	P	0.250616	A	0.401527	P	0.480547	P	0.405813	P	1.34724	1.71188	1.61926	0.274705	A	0.265965	P	0.244179	A	0.508437	P	0.409956	P	0.489895	P	1.85085	1.54139	2.00629	0.288344	P	0.25046	P	0.825095	P	0.410232	P	0.273547	P	0.248649	A	1.42272	1.09218	-3.31832
DSK2	orf19.5345	Protein binding	4.0062	P	5.21929	P	5.86113	P	5.0542	P	4.35226	P	4.35495	P	1.26159	-1.19921	-1.34586	1.87565	A	2.04484	P	2.08776	M	2.8286	P	3.71303	P	3.6119	P	1.50806	1.81581	1.73004	1.55419	P	2.16298	P	2.69708	A	1.96042	P	2.30261	P	2.75135	A	1.26138	1.06455	1.02012
DUR1,2	orf19.780	Allophanate hydrolase activity	1.84814	P	0.694103	P	0.960559	P	2.96527	P	1.37171	P	2.09279	P	1.66903	1.88674	2.15929	0.644917	P	0.408458	P	0.44597	P	1.45537	P	1.63159	P	1.20603	P	2.07152	3.97449	2.57264	0.698364	P	0.483425	P	0.307985	P	1.21815	P	0.951904	P	0.466216	P	1.74429	1.96908	1.51376
EBP4	orf19.3433	NADPH dehydrogenase activity	4.05165	P	1.99263	P	1.77157	P	4.55114	P	4.6877	P	4.95137	P	1.12328	2.35252	2.79491	3.93617	P	2.8159	P	2.73612	P	6.92318	P	7.15007	P	5.46445	P	1.75886	2.53918	1.99715	1.97546	P	2.02026	P	2.4943	P	15.5734	P	16.0882	P	28.323	P	7.88341	7.96343	11.3551
ECE1	orf19.3374	--	0.365702	A	0.370086	A	0.633525	A	4.77672	P	4.02366	P	7.03354	P	25.5641	16.4237	38.852	0.338298	A	0.365659	M	0.374925	A	0.430506	P	0.231515	A	0.166542	A	1.37137	1.12521	2.41175	0.174847	A	0.242173	A	0.186945	A	0.311776	P	0.211423	A	0.297297	A	2.73093	-1.30974	2.13613
ECM29.exon1	orf19.6773	--	0.192149	P	0.407248	P	0.481512	P	0.500763	P	0.661409	P	0.745109	P	2.60612	1.62409	1.54744	0.0676123	A	0.0512908	P	0.227463	P	0.0674956	A	0.0512445	A	0.01	A	-1.00173	-1.0009	-22.7463	0.783231	P	0.848066	P	0.207858	A	0.706564	P	0.862725	P	0.555405	P	-1.10851	1.01729	2.67204
ERG24	orf19.1598	Delta 14-sterol reductase activity	8.06663	P	7.35811	P	7.80115	P	12.4443	P	11.6625	P	12.4572	P	1.54269	1.58498	1.59685	6.34894	P	6.94667	P	5.89851	P	8.65853	P	11.0648	P	8.49401	P	1.36378	1.59282	1.44003	7.33231	P	6.85083	P	5.14956	P	7.68147	P	5.71443	P	7.55811	P	1.04762	-1.19887	1.46772
ERG26	orf19.2909	C-3 sterol dehydrogenase (C-4 sterol decarboxylase) activity	3.60021	P	3.15541	P	2.29663	P	5.86183	P	4.84227	P	4.88541	P	1.62819	1.5346	2.12721	8.45248	P	6.83764	P	5.41791	P	6.00711	P	9.41581	P	9.68787	P	-1.40708	1.37706	1.78812	5.38344	P	5.1814	P	6.08619	P	4.21139	P	4.42585	P	4.5527	P	-1.2783	-1.17071	-1.33683
ERG27	orf19.3240	3-keto sterol reducatase activity	3.84194	P	3.40356	P	3.39195	P	5.71908	P	5.55941	P	6.3678	P	1.48859	1.63341	1.87733	5.32151	P	4.77072	P	4.57433	P	5.7278	P	5.78477	P	5.21669	P	1.07635	1.21256	1.14043	3.318	P	3.70994	P	3.86058	P	3.33591	P	3.28958	P	2.8473	P	1.0054	-1.12779	-1.35588
EXG2	orf19.2952	Glucan 1,3-beta-glucosidase activity	0.856147	P	0.852273	P	1.23254	P	1.68321	P	2.07413	P	2.06568	P	2.17403	2.41263	1.75951	0.221749	P	0.167459	A	0.21403	A	0.397203	P	0.312042	P	0.348802	P	1.87525	1.98192	1.55084	0.514826	P	0.463168	P	0.920786	P	0.652992	P	0.698397	P	0.854054	P	1.2662	1.50855	-1.03599
FAA24	orf19.7156	Long-chain-fatty-acid-CoA ligase activity	0.262655	P	0.233722	P	0.314297	A	0.364122	P	0.632492	P	0.452767	P	1.36274	2.67009	1.44184	0.145154	P	0.147079	M	0.139104	P	0.330151	P	0.282577	P	0.371445	P	2.31414	1.92063	2.96992	0.337423	P	0.226519	P	0.311153	P	0.245656	P	0.216934	P	0.351351	P	-1.33987	-1.08499	2.53217
FEN2	orf19.5535	Pantothenate transporter activity	2.24948	P	2.83385	P	2.5871	P	3.37405	P	5.78339	P	3.82868	P	1.50288	2.05532	1.4801	1.86785	P	1.80944	P	2.76955	P	3.14742	P	2.5075	P	3.00936	P	1.70067	1.38584	1.06542	2.15491	P	1.89687	P	3.60646	P	1.92326	P	1.85271	P	2.43041	P	-1.12537	-1.03256	-1.37265
FET34.3eoc	orf19.4215	Ferroxidase activity	8.39773	P	8.77457	P	8.4848	P	3.81527	P	6.21451	P	8.33427	P	-2.20109	-1.41195	-1.01806	0.214184	M	0.134851	P	0.0477612	A	0.347247	P	0.214129	P	0.19274	P	1.62125	1.5879	4.03548	0.92638	P	0.496317	P	0.515843	A	0.487452	P	0.195391	P	0.302703	A	-1.90046	-2.54012	-1.70412
FMS1	orf19.4589	--	0.768595	P	0.683047	P	0.662284	P	1.28168	P	1.06519	P	0.643935	P	1.66756	1.55948	-1.0285	0.300236	P	0.287364	P	0.320597	P	0.775755	P	0.693631	P	0.736901	P	2.58381	2.41377	2.29853	0.699387	P	0.585635	P	0.907478	P	0.714286	P	0.703407	P	0.693243	P	1.0213	1.2011	-1.30903
FRE30.3	orf19.6139	Ferric-chelate reductase activity	7.99329	P	8.63145	P	6.8258	P	4.32366	P	11.5552	P	2.74231	P	-1.84873	1.33873	-2.48907	5.04397	P	5.48607	P	7.04239	P	7.69849	P	8.33785	P	10.9064	P	1.52628	1.51982	1.54868	2.27198	P	1.75506	P	2.86312	P	3.55019	P	2.60721	P	5.34865	P	1.5626	1.48554	1.86812
FRE30.53	orf19.6140	Ferric-chelate reductase activity	2.40289	P	3.12346	P	2.99589	P	2.03053	P	3.66667	P	1.6607	P	-1.18338	1.17391	-1.80399	0.526241	A	0.97928	P	3.09612	P	1.44183	P	1.59773	P	0.591317	P	2.73987	1.63154	-5.23597	2.7955	P	1.91252	P	4.08619	P	4.20656	P	3.89078	P	6.91081	P	1.50476	2.03437	1.69126
FRE7	orf19.7077	Ferric-chelate reductase activity	0.924845	P	0.770577	P	0.664339	P	0.582443	P	0.944269	P	0.311906	P	-1.46018	1.22464	-2.14112	1.77589	P	2.28142	P	1.84209	P	2.94871	P	3.91709	P	4.98578	P	1.65486	1.69614	2.84508	1.38599	P	1.27072	P	0.948669	P	1.3499	P	1.6017	P	2.26351	P	-1.0091	1.2674	2.44305
FRP2	orf19.6169	--	0.328512	P	0.381142	P	0.986442	P	0.569847	P	2.65247	P	2.50699	P	1.74697	7.39933	2.53019	0.558865	P	0.459239	P	1.09642	P	0.60746	P	0.303441	P	0.721183	P	1.08496	-1.52301	-1.53037	1.21575	P	0.404696	P	1.00127	P	0.686293	P	0.541082	P	0.716892	P	-1.77878	1.33807	-1.39054
FTH2	orf19.3227	Iron ion transporter activity	0.148244	A	0.265356	P	0.233361	A	0.228244	P	0.50368	P	0.528228	P	1.53965	1.89813	2.26357	0.820804	P	0.755775	P	0.532537	P	0.670515	P	0.930088	P	1.11527	P	-1.22414	1.23064	2.09426	0.527607	P	0.389503	P	0.481622	P	0.639961	P	0.497996	P	0.681081	P	1.21295	1.27854	1.41414
GAL1	orf19.3670	Galactokinase activity	0.652376	P	1.18489	P	0.788003	P	1.00305	P	2.85594	P	1.90665	P	1.53754	2.4103	2.4196	3.66005	P	3.58967	P	2.83881	P	2.47114	P	2.51061	P	2.07522	P	-1.48112	-1.4298	-1.36795	2.15031	P	1.59853	P	0.548796	P	1.47394	P	1.37976	P	0.443243	P	-1.45889	-1.15855	-1.23814
GBA1	orf19.4015	GTPase activity	1.85589	P	1.60043	P	0.987675	P	1.16489	P	1.3817	P	1.28871	P	-1.59088	-1.161	1.31531	0.0515366	A	0.0706522	A	0.118507	P	1.8548	P	1.6175	P	1.62425	P	41.7861	21.7592	20.4761	0.166155	P	0.144567	P	0.344106	A	0.138514	P	0.121743	P	0.268919	A	-1.20217	-1.1998	1.34642
GDI1	orf19.7261	Rab GDP-dissociation inhibitor activity	4.63791	P	4.9699	P	5.82991	P	6.60076	P	8.02839	P	5.19843	P	1.42322	1.6154	-1.12147	2.10213	P	1.97996	P	2.56836	P	3.54218	P	3.12372	P	5.01422	P	1.68505	1.57767	1.95231	1.7638	P	1.88766	P	3.53105	P	2.08108	P	2.00701	P	3.18919	P	1.17988	1.06323	-1.10719
GPH1	orf19.7021	Glycogen phosphorylase activity	41.6209	P	28.2279	P	21.7995	P	34.6649	P	43.0894	P	13.1151	P	-1.20066	1.52648	-1.66216	23.983	P	13.2018	P	8.98328	P	16.218	P	17.0366	P	13.7957	P	-1.47878	1.29048	1.5357	3.16973	P	3.58195	P	0.638783	P	5.03089	P	5.5982	P	2.40135	P	1.58716	1.56289	3.75926
GPX1	orf19.86	Glutathione peroxidase activity	6.40315	P	4.18581	P	2.81101	P	13.2118	P	13.9196	P	14.976	P	2.08939	3.47566	5.15226	6.65816	P	5.85955	P	5.38448	P	18.3033	P	19.5494	P	19.7981	P	3.05024	3.51201	4.94633	4.70194	P	3.83794	P	2.13688	P	10.7548	P	12.0751	P	18.9818	P	2.3943	3.17182	8.83734
GRP2	orf19.4309	Oxidoreductase activity	20.8944	P	16.7414	P	20.7313	P	61.937	P	88.3039	P	67.6864	P	2.95908	5.33811	3.39836	8.5182	P	5.69276	P	6.01164	P	41.5431	P	34.6997	P	33.3469	P	4.87302	6.10747	5.54269	4.44734	P	4.24171	P	4.18441	P	31.9237	P	34.2305	P	77.8595	P	7.63094	8.5989	18.645
HBS1.3f	orf19.7144	--	6.66064	P	6.06204	P	5.70994	P	6.09313	P	5.79075	P	4.13695	P	-1.09314	-1.04685	-1.38023	2.43641	P	2.06386	P	2.64478	P	4.02353	P	3.39422	P	4.5101	P	1.65142	1.6446	1.70529	3.66564	P	3.11878	P	2.99366	P	3.08398	P	4.54709	P	4.12297	P	-1.18861	1.45797	1.37723
HEM1	orf19.2601	5-aminolevulinate synthase activity	30.1839	P	31.7697	P	29.1483	P	49.566	P	68.887	P	52.1733	P	1.65232	2.1546	1.78347	23.1757	P	17.1824	P	25.6499	P	16.0249	P	18.5048	P	15.5331	P	-1.42149	1.07395	-1.73253	9.24131	P	7.39227	P	13.2719	P	7.75772	P	8.45591	P	14.9405	P	-1.18801	1.14753	1.14442
HGT11	orf19.4527	Glucose transporter activity	6.16804	P	13.0622	P	16.8841	P	18.4097	P	57.1872	P	28.1185	P	3.04243	4.38473	1.6778	5.79228	P	7.94871	P	11.6068	P	10.1103	P	6.29234	P	7.1895	P	1.71598	-1.29965	-1.6387	16.2621	P	10.5117	P	22.4014	P	7.42761	P	6.97094	P	8.51036	P	-2.13336	-1.50691	-2.54699
HGT12	orf19.3668	Glucose transporter activity	0.815083	P	1.42076	P	1.64092	P	1.80992	P	19.8312	P	7.05338	P	2.36266	13.9534	4.43265	0.846572	P	1.44039	P	2.98567	P	5.71781	P	3.72712	P	5.34038	P	6.75348	2.58866	1.80619	5.47597	P	2.58656	P	1.07414	P	1.75917	P	0.827655	P	0.357432	A	-3.10154	-3.11512	-2.97392
HIK1.3eoc	orf19.5181	Osmosensor activity	0.495351	P	0.595823	P	0.525062	P	0.772519	P	1.05258	P	0.823365	P	1.55954	1.76659	1.56813	0.224586	P	0.554348	P	0.762985	P	0.854796	P	0.845168	P	0.483533	P	3.80609	1.52462	-1.57794	0.769939	P	0.706261	P	0.808619	P	0.944015	P	0.936874	P	1.58514	P	1.22609	1.32653	1.9603
HIK1.5eoc	orf19.5181	Osmosensor activity	0.276343	P	0.52457	P	0.512736	P	0.69542	P	0.921136	P	0.936277	P	2.51651	1.75598	1.82604	0.123877	A	0.217731	P	0.478209	P	0.312611	P	0.299414	P	0.0681138	A	2.52356	1.37516	-7.02074	1.22495	P	0.780847	P	1.10393	P	1.02606	P	1.16533	P	1.90541	P	-1.19384	1.49239	1.72602
HWP1	orf19.1321	--	10.5243	P	7.08292	P	16.6105	P	15.6954	P	21.0526	P	25.1694	P	1.49135	2.9723	1.51527	1.04728	A	0.370924	A	1.28299	A	1.06528	A	0.331625	A	1.12201	A	1.01718	-1.1185	-1.14347	0.294478	A	0.615101	A	1.52218	A	0.936293	A	0.880761	A	0.981081	A	3.1795	1.4319	-1.55153
IFA24.3	orf19.156	--	1.06663	P	0.85688	P	0.805259	M	1.20992	P	1.23449	P	1.8038	P	1.13434	1.44068	2.24003	0.976832	P	0.844769	P	0.761791	P	1.67496	P	1.75476	P	2.14933	P	1.71468	2.0772	2.82141	0.762781	P	0.686004	P	0.239544	A	0.695946	P	0.475952	P	0.559459	P	-1.09604	-1.44133	2.33552
IFD1	orf19.1048	Aryl-alcohol dehydrogenase activity	0.951705	P	0.463452	P	0.530813	M	68.1137	P	92.9127	P	75.088	P	76.2375	200.658	141.507	0.535697	P	0.26002	P	0.295522	A	44.1568	P	34.2042	P	37.0586	P	151.577	195.916	299.81	0.198364	P	0.178637	P	0.356781	P	39.792	P	44.8943	P	82.0588	P	263.853	333.155	247.605
IFD2	orf19.771	Aryl-alcohol dehydrogenase activity	1.27273	P	0.824324	P	0.690222	P	17.1828	P	11.4732	P	16.3921	P	13.7873	14.7369	23.7491	1.47139	P	1.34273	P	0.909254	P	7.8206	P	10.9905	P	9.14296	P	5.3601	8.19359	10.9192	1.2229	P	1.157	P	1.52852	P	3.97153	P	4.67585	P	3.80811	P	3.46023	3.81797	5.11583
IFD4	orf19.4477	Aryl-alcohol dehydrogenase activity	2.68621	P	1.62654	P	1.29129	P	49.6962	P	53.8202	P	61.623	P	21.3183	37.932	75.4847	0.401418	P	0.262058	P	0.25403	P	32.1097	P	27.9337	P	31.4137	P	81.0259	115.886	149.727	0.276585	P	0.348066	P	0.176172	P	21.9788	P	23.3257	P	39.925	P	128.973	97.669	212.491
IFD5	orf19.1048	Aryl-alcohol dehydrogenase activity	0.238636	P	0.121622	P	0.36894	P	33.5893	P	44.0105	P	53.2292	P	140.755	361.864	144.276	0.581797	P	0.339504	P	0.382388	P	42.6388	P	38.2344	P	38.8271	P	137.709	155.751	201.065	0.288344	P	0.239871	P	0.196451	A	38.0014	P	43.7044	P	70.1007	P	307.312	274.726	964.19
IFD6	orf19.4476	Aryl-alcohol dehydrogenase activity	0.0769628	M	0.0546683	A	0.0287592	A	74.326	P	70.5216	P	88.1403	P	965.739	1289.99	3064.76	0.0827423	A	0.0550272	P	0.0232836	A	46.7806	P	45.0333	P	44.6254	P	565.377	818.383	1916.6	0.0214724	A	0.01	A	0.01	A	26.2095	P	25.8036	P	28.9095	P	1220.61	2580.36	2890.95
IFD7	orf19.629	Aryl-alcohol dehydrogenase activity	0.313791	A	0.109029	A	0.183237	A	27.2405	P	43.6146	P	40.3102	P	113.135	338.244	332.418	0.536958	P	0.364017	P	0.396617	P	29.5326	P	25.0836	P	26.8225	P	55.2118	66.791	138.995	0.0674097	A	0.116943	A	0.168944	A	29.5023	P	32.2071	P	80.6077	P	575.504	311.657	656.376
IFK2	orf19.856	--	0.57593	P	0.609337	P	0.67954	A	1.13206	P	0.843323	P	0.79374	P	1.96562	1.384	1.16805	0.303073	P	0.238451	M	0.203582	P	0.463588	P	0.415081	P	0.45247	P	1.52962	1.74074	2.22254	0.214724	P	0.346225	P	0.233207	A	0.382239	P	0.294589	P	0.287838	P	1.78014	-1.17528	1.23426
IFK3	orf19.857	--	0.341684	P	0.512285	P	0.488085	P	0.695038	P	1.12618	P	1.0559	P	2.0404	2.20392	2.24249	0.669504	P	0.513077	P	0.491045	P	0.763544	P	0.675329	P	0.871445	P	1.13035	1.31597	1.81598	0.377812	P	0.334254	P	0.306084	P	0.268822	P	0.237976	P	0.446622	P	-1.40299	-1.40442	1.48291
IFM1	orf19.5167	Translation initiation factor activity	0.345558	P	0.465602	P	0.502054	P	0.635115	P	0.37224	P	0.484069	P	1.83794	-1.25081	-1.03715	0.326714	P	0.473505	P	0.357612	P	0.860568	P	0.784407	P	0.959581	P	2.63401	1.6566	2.6833	0.852761	P	0.877532	P	0.514575	P	0.999035	P	0.809619	P	0.75	P	1.17153	-1.08388	1.45751
IFU6.5f	orf19.5167	--	0.161157	A	0.0927518	A	0.124076	A	0.361832	A	0.260778	A	0.227501	A	2.24521	2.81157	1.83357	0.107801	A	0.131114	A	0.152836	A	0.163854	P	0.255856	M	0.25	P	1.51996	1.9514	1.63574	0.138037	P	0.127993	P	0.301648	A	0.107143	P	0.164329	P	0.222973	P	-1.28834	1.28389	-1.35284
INO1	orf19.7585	Inositol-3-phosphate synthase activity	1.65548	P	1.12377	P	0.66023	A	1.77595	P	1.94953	P	0.686417	P	1.11577	1.8373	1.04721	4.19125	P	4.75832	P	5.96537	P	7.75644	P	11.0789	P	10.0015	P	1.8522	2.31765	1.6481	22.1273	P	14.779	P	24.2529	P	18.07	P	17.3502	P	26.8122	P	-1.2267	1.16541	1.16326
IPF1009	orf19.4590	--	1.67149	P	1.95147	P	1.81923	P	2.08473	P	2.97371	P	3.4768	P	1.24723	1.52383	1.91114	0.530969	P	0.648098	P	0.567164	P	0.370338	P	0.510249	P	0.461826	P	-1.43374	-1.27016	-1.22809	0.196319	P	0.258748	P	0.258555	A	0.416988	P	0.518036	P	0.42973	P	2.12403	2.00209	1.66204
IPF10124	orf19.276	--	0.522211	P	0.583538	P	0.700082	P	0.887023	P	1.02629	P	1.08105	P	1.69859	1.75873	1.54418	0.494563	P	0.550611	P	0.546866	P	0.543073	P	0.57101	P	0.450599	P	1.09809	1.03705	-1.21364	0.299591	P	0.24954	P	0.174905	A	0.388996	P	0.436874	P	0.797297	P	1.29842	1.75072	4.55846
IPF10168.3	orf19.643	--	0.0733471	A	0.0933661	A	0.0706656	A	0.141221	A	0.141956	P	0.139184	P	1.92538	1.52042	1.96961	0.0832151	A	0.09375	P	0.0877612	A	0.16341	P	0.14202	P	0.128743	P	1.96371	1.51489	1.46696	0.513292	P	0.395948	P	0.135615	A	0.387066	P	0.360721	P	0.344595	P	-1.32611	-1.09766	2.54098
IPF10262	orf19.2726	--	1.43957	P	0.850737	P	0.27198	A	1.79542	P	1.64774	P	2.26216	P	1.2472	1.93684	8.31736	2.8643	P	2.09307	P	2.43164	P	4.95826	P	4.83419	P	4.28481	P	1.73105	2.30961	1.7621	2.45194	P	1.56446	P	1.87452	P	2.40927	P	2.65832	P	4.21216	P	-1.01771	1.69919	2.24706
IPF10300	orf19.2274	--	0.120351	A	0.170147	P	0.147905	A	0.258015	P	0.291272	P	0.27725	P	2.14385	1.71188	1.87452	0.0931442	A	0.113791	P	0.104478	A	0.190941	A	0.0735725	M	0.050524	A	2.04995	-1.54665	-2.06788	0.137014	P	0.142726	P	0.233207	P	0.140927	P	0.189379	P	0.471622	P	1.02855	1.32687	2.02233
IPF10333	orf19.1835	Cytoskeletal regulatory protein binding	0.22314	P	0.277641	P	0.42235	P	0.358015	P	0.415352	P	0.70095	P	1.60444	1.496	1.65964	0.238771	P	0.306386	P	0.425075	P	0.279751	P	0.18265	P	0.338698	P	1.17163	-1.67745	-1.25503	1.1953	P	0.565378	P	1.61724	P	1.26448	P	1.28156	P	0.867568	P	1.05788	2.26674	-1.86411
IPF10394	orf19.3364	--	0.844525	P	0.479115	P	0.302383	P	0.866412	P	0.452156	P	0.56512	P	1.02592	-1.05963	1.86889	0.332861	P	0.353261	P	0.160597	P	0.505773	P	0.583821	P	0.473428	P	1.51947	1.65266	2.94793	0.330266	P	0.411602	P	0.125475	A	0.491313	P	0.624248	P	0.258108	P	1.48763	1.51663	2.05704
IPF10595	orf19.1287	--	0.256715	M	0.240786	P	0.87839	P	0.148092	P	0.167192	A	0.798211	P	-1.73349	-1.44017	-1.10045	0.292199	P	0.190557	P	0.24	P	0.226909	P	0.195461	P	0.38024	P	-1.28773	1.02574	1.58433	0.461145	P	0.290055	P	1.03802	P	0.954633	P	0.497996	P	1.79595	P	2.07014	1.7169	1.73016
IPF10735	orf19.6790	RNA binding	0.0795455	P	0.100123	P	0.0345111	A	0.152672	P	0.290221	P	0.172163	P	1.9193	2.89865	4.98863	0.210402	P	0.170177	P	0.154627	P	0.203375	P	0.210102	P	0.150075	P	-1.03455	1.23461	-1.03033	0.163599	P	0.127993	P	0.231939	A	0.155405	P	0.114228	P	0.190541	P	-1.05273	-1.1205	-1.21727
IPF10795	orf19.2356	Transcription factor activity	0.01	A	0.153563	A	0.115859	A	0.181679	P	0.117771	A	0.159307	P	18.1679	-1.30391	1.37501	0.0978724	A	0.170856	P	0.190448	P	0.201155	P	0.270498	P	0.363024	P	2.05527	1.58319	1.90616	0.0746421	A	0.0635359	A	0.174905	P	0.138031	P	0.128256	P	0.0932433	A	1.84924	2.01865	-1.87579
IPF11006	orf19.4658	--	0.201188	A	0.333231	P	0.230896	A	0.317557	P	0.314406	P	0.344326	P	1.55912	1.05235	1.46822	0.184397	A	0.287704	P	0.167463	A	0.611901	P	0.55765	P	0.863398	P	3.43042	1.96679	4.91978	1.0593	P	1.21271	P	0.449303	P	1.04151	P	1.29459	P	1.23243	P	-1.02401	1.07479	3.15594
IPF11059	orf19.1395	Inorganic phosphate transporter activity	0.863895	P	0.590295	P	0.6894	P	1.70267	P	1.85857	P	1.60117	P	1.89563	3.2716	2.31758	0.144208	P	0.153702	P	0.162985	P	0.215808	P	0.211201	P	0.155876	P	1.41837	1.27819	-1.02414	0.097137	P	0.117864	P	0.0792142	A	0.22973	P	0.211924	P	0.173649	A	2.57351	2.0056	4.95996
IPF11101	orf19.4615	--	0.247934	A	0.240172	A	0.199671	A	0.299237	A	0.380652	A	0.318614	A	1.20692	1.58491	1.59569	0.314421	A	0.254416	P	0.256119	P	0.584814	P	0.406296	P	0.445734	P	1.85997	1.59698	1.74033	1.06953	P	0.768877	P	1.16477	P	0.954633	P	1.00902	P	1.08378	P	-1.12036	1.31233	-1.07472
IPF11161.3	orf19.3201	Transcription factor activity	0.01	A	0.0153563	A	0.164339	A	0.019084	A	0.0105152	A	0.0620458	A	1.9084	-1.46038	-2.64866	0.0529551	A	0.0838995	P	0.102687	P	0.23357	P	0.171303	P	0.267964	P	4.41072	2.04177	2.60953	0.46319	P	0.509208	P	0.541191	P	0.393822	P	0.462926	P	0.785135	P	-1.17614	-1.09998	1.45075
IPF11167	orf19.3198	Oxysterol binding	0.0418388	A	0.022199	A	0.0628595	A	0.0610687	A	0.0354942	A	0.0226383	A	2.16457	3.19478	-1.66269	2.04775	P	2.00577	P	1.61701	P	3.71337	P	3.6649	P	4.12088	P	1.80525	1.83602	2.63366	1.88753	P	1.66713	P	1.19265	P	1.84459	P	1.68036	P	1.3	P	1.11938	1.00833	1.13568
IPF1118	orf19.5422	--	1.47598	P	1.36271	P	1.20049	P	0.999618	P	1.45005	P	1.02487	P	-1.48256	1.04168	-1.19712	0.755319	M	0.617697	P	1.07045	P	0.72802	P	0.679722	P	0.640719	P	1.04453	1.16789	-1.75704	0.642638	P	0.892726	P	0.451838	P	2.16071	P	2.13577	P	2.74257	P	3.36295	2.40665	7.32464
IPF11182.3eoc	orf19.4697	ATPase activity	0.0867769	A	0.138821	P	0.168447	A	0.216794	P	0.221872	P	0.625489	P	2.49829	1.59826	3.71327	0.0586288	P	0.13519	P	0.141493	P	0.120337	P	0.110542	P	0.0815868	P	2.05253	-1.22298	-1.73426	0.617587	P	0.585635	P	0.671736	P	0.69305	P	0.465932	P	0.652703	P	1.12219	-1.25691	-1.02916
IPF11222	orf19.5840	--	1.78848	P	1.19349	P	0.884963	A	1.37748	P	1.19611	P	1.03941	P	-1.14917	1.02749	1.28052	2.5104	P	2.35666	P	2.4197	P	2.27154	P	2.34133	P	2.30595	P	-1.05191	-1.00992	-1.19215	1.16053	P	1.34622	P	1.12611	P	2.71863	P	3.3001	P	4.47568	P	2.3473	2.66914	4.62657
IPF11281	orf19.1944	G-protein coupled receptor activity	0.249483	P	0.693489	P	0.637633	P	0.634351	P	1.13985	P	1.16043	P	2.54266	1.64365	1.81989	0.526241	P	1.06114	P	1.84716	P	0.786412	P	0.633236	P	1.06512	P	1.4944	-1.67574	-1.73423	4.57669	P	3.51197	P	3.782	P	2.92085	P	2.94689	P	3.75405	P	-1.5669	-1.19175	-1.00744
IPF11432	orf19.6463	--	0.728306	P	0.907862	P	0.571898	P	0.541221	P	0.512093	P	0.523756	P	-1.34567	-1.77285	-1.09192	1.09929	P	1.17459	P	1.0406	P	1.95826	P	1.95498	P	1.98802	P	1.78138	1.66439	1.91046	2.00102	P	1.79742	P	1.95057	P	1.68533	P	1.58016	P	2.5027	P	-1.18732	-1.13749	1.28306
IPF11435	orf19.6461	--	0.75	P	0.62715	P	0.423172	P	0.678626	P	0.904311	P	0.622135	P	-1.10517	1.44194	1.47017	1.53239	P	1.71705	P	2.00657	P	3.93695	P	2.70205	P	3.04603	P	2.56916	1.57366	1.51803	1.93456	P	2.92818	P	0.884664	P	2.89865	P	2.6493	P	0.836487	P	1.49835	-1.10527	-1.0576
IPF11694	orf19.4355	Nicotinamide mononucleotide permase activity	0.165289	P	0.17629	P	0.100247	A	0.29084	M	1.74553	P	0.840693	P	1.75958	9.90148	8.38626	0.164539	A	0.152514	P	0.229254	M	0.12167	M	0.137262	P	0.198728	P	-1.35234	-1.11111	-1.15361	2.75869	P	0.769797	P	0.159696	A	1.3388	P	0.393788	P	0.225676	A	-2.06057	-1.95485	1.41316
IPF11821	orf19.6552	Thiol oxidase activity	1.27118	P	0.890663	P	0.368118	P	0.635878	P	0.617245	P	0.4673	P	-1.99909	-1.44297	1.26943	1.03593	P	1.06012	P	0.682388	P	2.00533	P	2.16252	P	2.18937	P	1.93577	2.03988	3.2084	0.383436	P	0.536832	P	0.437262	P	0.527027	P	0.492986	P	1.02297	P	1.37449	-1.08894	2.33949
IPF1264	orf19.7371	Transcription factor activity	0.288481	A	0.411241	A	0.371405	A	1.0584	P	1.30705	P	1.05757	P	3.791	3.20527	2.77035	0.469031	A	0.532099	P	0.765373	P	0.943606	P	0.908126	P	0.938248	P	1.96302	1.66258	1.19606	1.06953	P	0.724678	P	1.04943	P	1.63996	P	1.60321	P	2.48649	P	1.53335	2.2123	2.36937
IPF1272	orf19.7376	--	0.153409	P	0.213145	P	0.129006	P	0.100763	P	0.0578339	P	0.311906	P	-1.52247	-3.68547	2.41777	0.208038	P	0.379076	P	0.392239	P	0.482238	P	0.580893	P	0.792665	P	2.31803	1.53239	2.02087	0.534765	P	0.396869	P	0.429658	P	0.622587	P	0.504008	P	0.664865	P	1.16423	1.26996	1.54743
IPF12963	orf19.5094	--	0.442407	P	0.309582	P	0.279786	A	1.11183	P	1.03575	P	0.683622	P	2.64067	3.30706	2.79991	0.371631	P	0.30214	P	0.328358	P	0.285524	P	0.433565	P	0.293039	A	-1.29956	1.37776	-1.39118	0.111452	P	0.116022	P	0.0126743	A	0.19305	P	0.246493	P	0.271622	M	1.73214	2.12453	21.4309
IPF1321	orf19.6413	--	0.0924587	A	0.148649	A	0.314708	A	0.158779	A	0.13775	A	0.259922	A	1.71729	-1.07912	-1.21078	0.0732861	A	0.0492527	A	0.17194	P	0.351687	P	0.139092	P	0.322605	P	4.79883	2.82405	1.87626	0.368098	P	0.288214	P	0.536122	P	0.379344	P	0.299599	P	1.04459	P	1.03055	1.0395	1.94843
IPF13319	orf19.740	Transcriptional activator activity	0.671746	P	2.70209	P	3.33566	P	1.71031	P	5.07992	P	6.93013	P	2.54666	1.90345	2.09112	0.759811	P	1.50696	P	2.88358	P	1.1845	P	0.804173	P	2.05258	P	1.64194	-1.83661	-1.40656	7.16667	P	4.73066	P	6.79848	P	4.09073	P	3.63778	P	5.30338	P	-1.67961	-1.30213	-1.39275
IPF13423	orf19.4128	--	0.16064	P	0.211302	P	0.125719	A	0.336641	P	0.303891	P	0.157071	P	2.09562	1.43818	1.24938	0.123404	P	0.186141	P	0.13791	P	0.21048	P	0.402269	P	0.53518	P	1.70561	2.1611	3.88063	0.160532	P	0.325046	P	0.129278	A	0.300193	P	0.168337	P	0.0256757	A	1.86999	-1.93093	-5.03502
IPF13609	orf19.6526	--	2.71849	P	2.69042	P	2.44864	P	1.53206	P	2.10936	P	2.64617	P	-1.7744	-1.27547	1.08067	3.33664	P	3.00883	P	3.68537	P	5.85702	P	4.9246	P	6.70733	P	1.75536	1.63671	1.81999	1.1002	P	0.990792	P	1.03549	P	1.41023	P	1.25451	P	1.86622	P	1.28179	1.26617	1.80226
IPF13723	orf19.260	--	2.19267	P	1.60688	P	1.36154	P	3.32443	P	2.40063	P	2.13918	P	1.51616	1.49397	1.57114	4.7357	P	3.19463	P	1.76597	P	3.19227	P	7.82796	P	3.30576	P	-1.48349	2.45035	1.87192	0.951943	P	1.44751	P	0.60076	P	1.39961	P	1.25351	P	1.04595	P	1.47027	-1.15477	1.74104
IPF13883	orf19.5502	--	0.202479	P	0.195332	P	0.253903	P	0.161832	P	0.140904	P	0.158189	P	-1.25117	-1.38627	-1.60506	0.0690307	A	0.0944293	P	0.125373	P	0.156306	P	0.18082	P	0.216692	P	2.26429	1.91487	1.72837	0.0858896	P	0.0764273	P	0.268695	P	0.123552	P	0.10521	P	0.143243	A	1.4385	1.37661	-1.87579
IPF14030	orf19.851	--	0.119835	P	0.135135	A	0.174199	A	0.0824427	P	0.132492	P	0.0916713	P	-1.45355	-1.01995	-1.90025	0.01	A	0.0417799	A	0.0435821	A	0.0572824	P	0.0995607	P	0.0692365	P	5.72824	2.38298	1.58865	0.101227	P	0.124309	P	0.136882	A	0.0801158	P	0.102204	P	0.0310811	A	-1.26351	-1.21628	-4.40403
IPF14094.repeat8.5f	orf19.3144	--	1.66994	P	1.99017	P	2.08299	P	2.83817	P	3.4143	P	3.30296	P	1.69956	1.71558	1.58568	0.880851	P	1.71026	P	2.64418	P	2.32016	P	1.58968	P	0.328219	P	2.634	-1.07585	-8.05615	4.85174	P	4.50921	P	4.74905	P	4.6805	P	5.10321	P	8.78784	P	-1.03658	1.13173	1.85044
IPF14119	orf19.4688	--	6.68879	P	6.38421	P	4.13599	P	4.25763	P	5.72345	P	5.89352	P	-1.63257	-1.15248	1.44909	6.92293	P	5.83407	P	6.49851	P	7.28708	P	6.74121	P	5.95341	P	1.15866	1.17545	-1.181	1.88497	P	1.21455	P	1.26806	A	3.29778	P	2.27255	P	3.48919	P	1.76839	2.12235	2.63292
IPF14379	orf19.4474	--	0.195764	A	0.041769	A	0.0542317	A	0.176336	A	0.01	A	0.164897	A	-1.11018	-4.1769	3.04059	0.146099	A	0.292459	P	0.0991045	A	0.236679	P	0.440703	P	0.287799	P	1.61998	1.50689	2.904	0.257669	P	0.369245	P	0.21166	A	0.344595	P	0.316633	P	0.254054	P	1.33736	-1.16616	1.20029
IPF14448	orf19.5601	--	0.0919422	M	0.109337	A	0.0788825	A	0.193893	P	0.13775	P	0.140861	P	2.10886	1.25987	1.7857	0.0884161	P	0.0838995	P	0.0465672	A	0.139876	P	0.140556	P	0.152695	P	1.58202	1.6753	3.27902	0.200409	P	0.267035	P	0.332066	A	0.247104	P	0.241483	P	0.22027	A	1.233	-1.10581	-1.50754
IPF14968	orf19.3461	--	0.570764	P	0.567568	P	0.560394	P	0.945802	P	0.856993	P	1.09503	P	1.65708	1.50994	1.95403	0.361702	P	0.421535	P	0.396418	P	0.59103	P	0.465959	P	0.560629	P	1.63402	1.10539	1.41424	0.50818	P	0.278085	P	0.674271	P	0.474903	P	0.373748	P	0.537838	P	-1.07007	1.34401	-1.25367
IPF14981	orf19.3483	--	0.0578512	A	0.130221	A	0.112572	A	0.296183	P	0.233438	P	0.226942	P	5.11974	1.79263	2.01598	0.0832151	A	0.138927	P	0.0734328	A	0.273979	P	0.24817	P	0.219686	P	3.29241	1.78634	2.99165	0.311861	P	0.394107	P	0.198986	P	0.567568	P	0.41984	P	0.333784	P	1.81994	1.06529	1.67742
IPF15255	orf19.4884	Transcription regulator activity	0.330062	A	0.224201	A	0.338537	A	0.699237	P	0.746583	P	0.553382	P	2.1185	3.32996	1.63463	0.1513	A	0.0713315	A	0.115821	A	0.0879219	A	0.0186676	A	0.0688623	A	-1.72085	-3.82113	-1.68192	0.0736196	A	0.0662983	A	0.0570342	A	0.0849421	A	0.0320641	A	0.0662162	A	1.1538	-2.06768	1.16099
IPF15273	orf19.1822	Transcription factor activity	0.98657	P	1.22973	P	1.04273	P	2.42748	P	2.53733	P	2.17384	P	2.46053	2.06332	2.08476	0.331915	P	0.425272	P	0.336716	P	0.242451	P	0.242313	P	0.259731	A	-1.369	-1.75505	-1.29641	0.261759	P	0.101289	P	0.532319	P	0.361004	P	0.483968	P	0.256757	A	1.37915	4.77808	-2.07324
IPF15890	orf19.6349	Cytoskeletal protein binding	0.179236	P	0.0890663	P	0.0632703	A	0.334351	P	0.129338	P	0.100615	P	1.86543	1.45215	1.59024	0.198109	M	0.123302	P	0.0746269	M	0.226021	P	0.373719	P	0.213323	P	1.1409	3.03093	2.85853	0.490798	P	1.04512	P	0.273764	P	0.750965	P	0.734469	P	0.344595	P	1.53009	-1.42296	1.25873
IPF16173.3f	orf19.4508	--	0.462293	P	0.461916	P	0.650781	A	0.934351	P	0.812829	P	1.06149	P	2.02112	1.75969	1.6311	0.14279	P	0.120584	P	0.131343	P	0.114565	P	0.15959	P	0.108907	A	-1.24636	1.32347	-1.20601	0.093047	A	0.127072	P	0.337136	A	0.145753	P	0.0841683	P	0.168919	A	1.56644	-1.50973	-1.99584
IPF1621	orf19.6585	--	0.704029	P	0.429975	M	0.654067	A	0.365649	P	0.478444	P	0.607043	P	-1.92542	1.11272	-1.07746	1.42364	P	2.43274	P	2.10567	P	4.03552	P	5.95791	P	5.93114	P	2.83465	2.44905	2.81674	6.73006	P	5.81676	P	3.87706	P	5.7278	P	8.05711	P	22.5743	P	-1.17498	1.38516	5.82254
IPF1632	orf19.6579	--	1.8001	P	1.98956	P	1.39688	P	2.16031	P	1.52471	P	1.44606	P	1.2001	-1.30488	1.03521	2.11915	P	2.50679	P	1.92478	P	3.11545	P	3.90483	P	2.99027	P	1.47014	1.5577	1.55357	1.45297	P	1.89595	P	2.05957	P	1.82143	P	1.77355	P	1.35	P	1.25359	-1.06902	-1.52561
IPF16320	orf19.5131	--	2.97753	P	1.91093	P	1.6401	P	2.68397	P	2.10147	P	1.63807	P	-1.10998	1.10302	1.01136	2.17943	P	1.69786	P	1.36537	P	3.40764	P	4.41947	P	3.12893	P	1.56547	2.59736	2.20594	0.982106	P	1.27118	P	0.987959	P	1.29006	P	1.60922	P	0.72973	P	1.45488	1.26169	-1.11811
IPF16323	orf19.6460	ATPase activity	0.198347	P	0.295455	P	0.147083	A	0.331298	P	0.166141	A	0.334265	P	1.67029	-1.77834	2.27263	0.0964539	M	0.190897	P	0.208358	A	0.299734	P	0.310395	P	0.331587	P	3.10753	1.62599	1.59143	0.392638	P	0.854512	P	0.243346	A	0.659266	P	0.48497	P	0.195946	M	1.67907	-1.76199	-1.2419
IPF1651	orf19.6570	Nucleoside permease activity	1.7407	P	0.802825	P	1.39441	P	1.28702	P	0.92429	P	0.980995	P	-1.3525	1.1513	-1.42143	1.83546	P	1.53057	P	1.58866	P	6.94405	P	4.15813	P	3.97231	P	3.78327	2.71672	2.50042	2.06339	P	1.69337	P	1.0507	P	1.63996	P	1.9519	P	1.7027	P	-1.2582	1.15267	1.62055
IPF1674	orf19.6559	--	9.06328	P	5.29484	P	4.58915	P	8.94809	P	4.70084	P	2.57546	P	-1.00106	-1.13034	-1.75846	2.15083	P	1.60326	P	1.91313	P	4.70671	P	5.16764	P	5.31418	P	2.14656	3.2288	2.6512	1.35378	P	2.59622	P	2.564	P	1.91071	P	2.57164	P	1.52838	P	1.54117	-1.03745	-1.26851
IPF1674.3	orf19.6559	--	1.49613	P	0.664926	P	0.97083	P	1.54084	P	0.95163	P	0.610397	P	1.04103	1.42612	-1.50348	0.826241	P	0.525476	P	0.482388	P	1.58881	P	1.30875	P	1.39072	P	1.91244	2.5028	3.17441	0.351738	P	0.612339	P	0.577313	P	0.449807	P	0.48998	P	0.552027	P	1.57382	-1.30697	-1.03163
IPF17186	orf19.251	--	1.70713	P	1.09275	P	0.990961	P	35.3153	P	40.0221	P	37.7574	P	20.6671	38.9112	39.7287	2.26714	P	1.61328	P	1.68627	P	20.4885	P	23.452	P	23.4319	P	9.19205	14.7996	14.6111	1.24335	P	0.913904	P	2.30292	P	22.029	P	24.5516	P	33.1331	P	20.7748	31.3692	20.9691
IPF17255	orf19.696	Mating-type alpha-factor pheromone receptor activity	0.119835	A	0.0325553	A	0.274445	A	0.080916	A	0.181914	A	0.0810509	A	-1.48098	5.58784	-3.38609	0.122459	A	0.0268342	A	0.0501493	A	1.05107	P	1.1175	P	0.869012	P	8.58303	41.6444	17.3285	0.135992	A	0.0395948	A	0.179975	A	0.034749	A	0.0210421	A	0.0418919	A	-3.91354	-1.8817	-4.29617
IPF18161	orf19.6587	--	0.293905	P	0.197789	P	0.309778	P	0.141221	P	0.0830705	A	0.327557	P	-2.08116	-2.38098	1.05739	0.251064	P	0.335938	P	0.208955	P	0.65897	P	0.536237	P	0.419536	P	2.62471	1.59624	2.00778	0.778119	P	0.733886	P	0.904943	P	0.908301	P	0.822645	P	0.45	P	1.1673	1.12094	-2.01098
IPF18316.3f	orf19.5145	--	0.755165	P	0.691032	P	0.843878	P	0.978626	P	0.962145	P	1.24762	P	1.29591	1.39233	1.47844	0.205674	P	0.278872	P	0.420299	P	0.828153	P	0.611274	P	0.63473	P	4.02654	2.19195	1.51019	0.615542	P	0.51197	P	0.842839	P	0.388031	P	0.446894	P	0.527027	P	-1.58632	-1.14562	-1.59923
IPF1837	orf19.5877	Alcohol O-acetyltransferase activity	2.15702	P	2.83047	P	2.61956	P	4.56489	P	5.24921	P	4.91448	P	2.11629	1.85454	1.87607	1.45343	P	1.55061	P	1.11104	P	2.41785	P	2.54685	P	2.38361	P	1.66355	1.64248	2.14538	0.49182	P	0.565838	P	0.993029	P	1.61293	P	2.31112	P	3.70946	P	3.83799	4.28945	5.98658
IPF18385	orf19.4143	--	0.01	A	0.01	A	0.01	A	0.0435115	A	0.0336488	A	0.0139743	A	4.35115	3.36488	1.39743	0.01	A	0.0186821	A	0.01	A	0.01	A	0.0442899	A	0.01	A	1	2.37072	1	0.142127	P	0.11326	P	0.126743	A	0.207529	P	0.170341	P	0.375676	P	1.46017	1.50398	2.96408
IPF18418	orf19.5620	--	9.62268	P	5.27856	P	4.02177	P	12.4828	P	12.6088	P	9.27865	P	1.297	2.39023	2.41872	3.38463	P	1.95228	P	2.12896	P	6.5222	P	5.36439	P	3.76085	P	2.03656	2.79826	1.74811	1.6907	P	1.89319	P	1.67744	P	4.10135	P	5.01653	P	6.0973	P	2.41945	2.65997	3.55303
IPF1862.5f	orf19.5894	--	0.0325413	A	0.0835381	A	0.119145	A	0.0541985	A	0.111462	M	0.0726663	M	1.66553	1.33426	-1.63962	0.0449173	M	0.0397418	A	0.041791	A	0.107904	M	0.067716	P	0.0875748	P	2.40229	1.7039	2.09554	0.0766871	A	0.0377532	A	0.210393	A	0.01	A	0.0711423	P	0.298649	P	-7.66871	1.8844	1.41948
IPF18641.exon1	orf19.3159	--	0.0774793	A	0.172604	P	0.042728	A	0.143511	P	0.321767	P	0.622694	P	1.85225	1.86419	14.5734	0.159338	A	0.335598	P	0.404776	P	0.107016	P	0.154466	P	0.0426647	A	-1.48892	-2.17264	-9.48738	0.705521	P	0.64825	P	0.235741	A	0.671815	P	0.531062	P	0.474324	P	-1.05017	-1.22067	2.01205
IPF1899	orf19.7131	--	1.24587	P	1.09951	P	1.64914	P	1.10305	P	1.69926	P	1.13192	P	-1.12947	1.54548	-1.45694	0.449645	P	0.359375	P	0.52	P	0.902309	P	0.658858	P	1.09993	P	2.00671	1.83334	2.11524	0.374233	P	0.371087	P	0.257288	A	0.392857	P	0.412826	P	0.547297	P	1.04977	1.11248	2.12718
IPF1912	orf19.7140	--	1.79855	P	1.49079	P	1.28677	P	1.13664	P	1.1735	P	0.78256	P	-1.58234	-1.27037	-1.64431	1.14941	P	0.908288	P	1.27582	P	2.06883	P	1.52709	P	2.37238	P	1.79991	1.68128	1.85949	0.9182	P	0.813996	P	0.595691	A	0.633205	P	0.948898	P	0.974324	P	-1.45008	1.16573	1.63562
IPF19295.5eoc3f	orf19.4649	--	0.0134298	A	0.022113	A	0.0920296	A	0.01	A	0.0147213	A	0.0346562	A	-1.34298	-1.50211	-2.6555	0.480851	P	0.484375	P	0.374925	P	0.904085	P	1.45242	P	0.823353	P	1.88018	2.99854	2.19605	0.502045	P	0.889503	P	0.572877	P	0.719112	P	0.901804	P	0.324324	M	1.43237	1.01383	-1.76637
IPF19513	orf19.6476	--	0.52376	P	0.5043	P	0.938373	P	0.50229	P	0.370137	P	0.759083	P	-1.04274	-1.36247	-1.23619	0.615603	P	0.613111	P	0.782687	P	0.902753	P	0.996706	P	1.29566	P	1.46645	1.62565	1.6554	0.48773	P	0.389503	P	1.0545	A	0.332046	P	0.375752	P	0.816216	P	-1.46886	-1.0366	-1.29194
IPF19538	orf19.6957.3	--	1.31198	P	1.72604	P	1.48726	P	2.93817	P	2.91062	P	8.9782	P	2.23949	1.6863	6.03672	0.719149	P	1.59409	P	1.81493	P	6.10435	P	6.99195	P	4.13698	P	8.4883	4.38617	2.27942	1.54601	P	1.76796	P	1.19518	P	4.78765	P	3.88176	P	3.23108	P	3.09677	2.19562	2.70342
IPF19908	orf19.1344	--	0.379132	P	0.379607	P	0.658176	P	0.467176	P	1.02944	P	1.21073	P	1.23222	2.71187	1.83953	0.195272	P	0.351223	P	0.368358	P	0.626554	P	0.7694	P	1.55015	P	3.20863	2.19063	4.20827	0.40184	P	0.223757	P	0.225602	P	0.252896	P	0.152305	P	0.218919	P	-1.58896	-1.46914	-1.03053
IPF19997	orf19.6458.1	--	0.661674	P	0.52887	P	0.33032	P	0.424427	P	0.413249	P	0.493013	P	-1.55898	-1.27978	1.49253	1.00142	P	0.935802	P	0.700299	P	1.91607	P	1.66032	P	1.71407	P	1.91336	1.77422	2.44763	0.912065	P	0.953039	P	0.612167	P	1.34459	P	1.45491	P	1.14324	P	1.47423	1.5266	1.86753
IPF19998	orf19.2175	Oxidoreductase activity	2.22159	P	1.85749	P	1.79047	P	2.2916	P	1.98423	P	1.75461	P	1.03151	1.06823	-1.02044	1.61371	P	1.22656	P	1.27403	P	2.54352	P	2.31332	P	2.25936	P	1.57619	1.88602	1.77339	1.41411	P	1.70626	P	0.754119	P	1.86293	P	1.97495	P	1.35	P	1.31739	1.15747	1.79017
IPF20010	orf19.5799	--	2.5984	P	2.97205	P	2.63969	P	4.82863	P	5.54627	P	4.11431	P	1.88481	1.866	1.55811	1.56761	P	1.56063	P	1.83552	P	2.33615	P	2.32906	P	2.44985	P	1.62033	1.49601	1.38931	0.988241	P	0.830571	P	1.53992	P	0.97249	P	0.962425	P	1.08514	P	1.00678	1.16011	-1.43504
IPF20015	orf19.499	--	0.590909	P	0.791769	P	1.20296	P	0.879389	P	1.29127	P	1.83287	P	1.4882	1.63087	1.52363	0.765957	P	0.641644	P	1.10925	P	0.821492	P	0.57284	P	0.986901	P	1.0725	-1.12011	-1.12398	0.815951	P	0.800184	P	1.39924	P	0.681467	P	0.602204	P	1.07027	P	-1.19734	-1.32876	-1.30737
IPF20157	orf19.6696	--	0.137397	P	0.0694103	P	0.0772391	A	0.256489	P	0.263933	P	0.152599	P	1.86677	3.8025	1.97567	0.115839	A	0.0557065	A	0.01	A	0.14032	A	0.135066	P	0.105165	A	1.21133	2.4246	10.5165	0.0511247	A	0.0626151	P	0.174905	A	0.0916988	P	0.0981964	P	0.0175676	A	1.79363	1.56825	-9.95613
IPF20169	orf19.5674	Heme binding	9.0186	P	2.85504	P	2.42975	P	16.487	P	12.1966	P	2.83846	P	1.82811	4.27197	1.16821	1.73901	P	0.809103	P	0.94209	P	3.54707	P	3.14605	P	2.99439	P	2.03971	3.88831	3.17845	0.806748	P	1.40608	P	0.812421	P	0.955598	P	1.24549	P	0.752703	P	1.18451	-1.12893	-1.07934
IPF2021	orf19.5245	--	0.630165	P	0.4914	P	0.495481	P	0.987023	P	1.06625	P	0.815539	P	1.56629	2.16981	1.64596	0.572577	P	0.403193	P	0.465672	P	0.438721	P	0.338214	P	0.335329	P	-1.3051	-1.19212	-1.3887	0.507157	P	0.392265	P	0.674271	A	0.389961	P	0.552104	P	1.49324	M	-1.30053	1.40748	2.2146
IPF2050	orf19.5265	Structural constituent of cytoskeleton	1.8781	P	1.83231	P	1.48316	P	3.26489	P	3.17876	P	3.48351	P	1.7384	1.73484	2.34872	0.420331	P	0.466033	P	0.523582	P	0.48579	P	0.459736	P	0.415793	P	1.15573	-1.0137	-1.25924	0.321063	P	0.313075	P	0.382763	P	0.454633	P	0.472946	P	0.204054	P	1.41602	1.51064	-1.87579
IPF2130	orf19.7204	--	0.184401	A	0.130221	M	0.309778	A	0.327481	P	0.228181	P	0.221912	P	1.77592	1.75226	-1.39595	0.165012	M	0.0652174	A	0.17194	M	2.83615	P	2.41508	P	2.61976	P	17.1875	37.0312	15.2365	0.260736	P	0.187845	P	0.291508	M	1.29344	P	1.38677	P	0.87973	P	4.96071	7.38253	3.01786
IPF2150	orf19.7193	--	3.33523	P	3.13022	P	4.30238	P	2.95191	P	3.71188	P	3.86137	P	-1.12985	1.18582	-1.11421	1.6279	P	1.51053	P	1.31701	P	2.79263	P	2.74488	P	3.70472	P	1.71548	1.81716	2.81296	2.53885	P	1.71639	P	4.6692	P	2.02703	P	1.8517	P	3.66622	P	-1.2525	1.07884	-1.27358
IPF2170	orf19.7179	--	0.6875	P	0.764128	P	0.735415	A	0.744275	P	0.616193	M	0.661822	M	1.08258	-1.24008	-1.1112	0.56643	P	0.505774	P	0.567164	P	1.70293	P	0.774524	P	1.41504	P	3.00643	1.53136	2.49495	0.944785	P	2.3407	P	1.09886	P	2.36004	P	1.34469	P	1.08784	P	2.49796	-1.7407	-1.01013
IPF2175	orf19.7175	--	1.29132	P	1.51597	P	1.48973	P	1.47176	P	1.31861	P	1.28843	P	1.13973	-1.14967	-1.15624	0.945627	P	0.79212	P	1.03045	P	1.39076	P	1.27892	P	1.68787	P	1.47073	1.61455	1.638	0.953988	P	1.01197	P	1.09125	P	1.08398	P	0.938878	P	1.01486	P	1.13626	-1.07785	-1.07527
IPF2186	orf19.7166	--	0.872676	P	0.764742	P	1.04478	P	2.65649	P	3.88801	P	6.85075	P	3.01113	6.02339	7.26616	0.658392	P	0.543988	P	0.83194	P	7.91141	P	7.73334	P	9.35254	P	14.0009	15.8347	11.7356	0.552147	P	0.616022	P	1.23638	P	6.17954	P	6.31162	P	13.4068	P	11.7981	11.0775	22.5104
IPF2189	orf19.7165	--	0.471333	P	0.466216	P	0.430978	A	0.51145	P	0.325447	A	0.392398	P	1.0932	-1.4694	-1.07575	0.35792	A	0.580333	P	0.518209	P	0.937611	P	1.26848	P	0.986527	P	3.08117	2.48777	1.86323	0.576176	P	0.589319	P	1.09886	P	0.673745	P	0.772545	P	0.737162	P	1.2224	1.30591	-1.02984
IPF2190	orf19.7164	--	1.29287	P	0.877764	P	1.40016	P	0.88626	P	1.19243	P	0.930688	P	-1.4588	1.35848	-1.50444	1.38109	P	1.13791	P	1.33672	P	2.09858	P	1.95388	P	2.70771	P	1.51951	1.71708	2.02564	0.725971	P	0.850829	P	0.542459	M	0.586873	P	0.618236	P	0.537838	P	-1.23702	-1.37622	-1.00859
IPF2228	orf19.6902	ATP-dependent RNA helicase activity	0.639979	P	0.952088	P	0.840592	P	0.532061	P	0.516299	P	0.831191	P	-1.20283	-1.84407	-1.01131	0.865721	P	1.21773	P	1.29373	P	1.84636	P	1.79722	P	2.06213	P	2.13274	1.47587	1.59394	1.69939	P	1.82965	P	1.63371	P	1.69595	P	1.90481	P	2.80135	P	-1.00203	1.04108	1.71471
IPF2280	orf19.6658	--	1.38171	P	0.917076	P	1.01643	P	1.53053	P	2.39012	P	0.98379	P	1.10771	2.60623	-1.03318	0.539007	P	0.358016	P	0.369552	P	1.01599	P	0.708272	P	0.54229	P	1.88492	1.97832	1.46743	0.741309	P	0.580111	P	1.33333	P	0.638031	P	0.662325	P	1.00946	P	-1.16187	1.14172	-1.32084
IPF2361	orf19.7023	--	0.403926	M	0.215602	A	0.289236	A	0.485496	M	0.139853	A	0.33147	A	1.20194	-1.54163	1.14602	0.298818	A	0.201427	P	0.226269	A	0.468028	P	0.511347	P	0.375	M	1.56627	2.53863	1.65732	0.473415	P	0.480663	P	0.479087	P	0.565637	P	0.734469	P	1.03649	P	1.1948	1.52803	2.16346
IPF2557	orf19.6627	--	4.03357	P	3.53501	P	3.17338	P	3.63588	P	4.59096	P	3.6389	P	-1.10938	1.29871	1.1467	6.36643	P	5.35054	P	5.23045	P	9.85968	P	8.89897	P	9.04491	P	1.5487	1.66319	1.72928	1.87832	P	1.33057	P	1.90875	P	2.71139	P	2.72745	P	4.17432	P	1.44352	2.04984	2.18695
IPF2582	orf19.5504	--	0.66219	P	0.465602	P	0.525883	A	0.505343	P	0.278654	P	0.493013	P	-1.31038	-1.6709	-1.06667	0.66714	P	0.742188	P	0.508657	P	1.21936	P	1.21047	P	1.42777	P	1.82774	1.63095	2.80694	0.48364	P	0.583794	P	0.329531	A	0.572394	P	0.823647	P	0.605405	A	1.18351	1.41085	1.83717
IPF2905	orf19.7457	--	0.0640496	P	0.107494	A	0.0821693	A	0.11374	P	0.0757098	A	0.112912	P	1.77582	-1.41981	1.37414	0.0912529	P	0.0662364	P	0.0847761	P	0.154529	P	0.163982	P	0.16729	P	1.69342	2.47571	1.97332	0.134969	P	0.154696	P	0.0228137	A	0.0955598	P	0.132265	P	0.0243243	A	-1.41241	-1.1696	1.06622
IPF300	orf19.3282	--	1.9437	P	2.02457	P	1.52506	P	1.99618	P	1.55836	P	1.80939	P	1.027	-1.29917	1.18644	0.470922	P	0.452106	P	0.424478	P	0.72913	P	0.978038	P	0.706961	P	1.5483	2.16329	1.66548	0.728016	P	0.43186	P	0.0633714	A	0.65444	P	0.623247	P	0.225676	P	-1.11243	1.44317	3.56116
IPF3014	orf19.5030	--	0.404442	P	0.359951	P	0.205423	P	0.872519	P	0.585699	P	0.464505	P	2.15734	1.62716	2.26121	0.437352	P	0.446332	P	0.374925	P	0.617673	P	0.611274	P	0.248503	P	1.4123	1.36955	-1.50874	0.843558	P	1.35635	P	0.30545	P	1.03668	P	0.956914	P	0.941892	P	1.22894	-1.41743	3.08362
IPF3069	orf19.7034	--	1.32645	P	1.37285	P	1.95645	P	1.34198	P	1.76236	P	1.63555	P	1.01171	1.28372	-1.1962	1.16265	P	1.08526	P	1.22269	P	1.87345	P	1.59517	P	1.84356	P	1.61136	1.46985	1.5078	0.845603	P	0.769797	P	1.50063	P	0.801158	P	1.04208	P	2.26622	P	-1.05548	1.35371	1.51017
IPF3080	orf19.7042	--	0.268078	P	0.484029	P	0.540674	P	0.619084	P	0.494217	P	1.43712	P	2.30934	1.02105	2.65801	0.370213	P	0.472826	P	0.505075	P	2.2802	P	2.20791	P	2.78406	P	6.15915	4.66959	5.51217	0.624744	P	0.564457	P	0.760456	P	6.6583	P	6.38677	P	9.30135	P	10.6576	11.3149	12.2313
IPF3081	orf19.7043	--	2.46746	P	0.812039	P	0.599836	P	2.14504	P	0.722397	P	0.857462	P	-1.15031	-1.12409	1.4295	1.83688	P	2.07099	P	0.877015	P	2.81128	P	4.73609	P	2.54341	P	1.53046	2.28687	2.90008	0.525562	P	1.05525	P	0.192649	P	0.587838	P	0.664329	P	0.304054	P	1.11849	-1.58844	1.57828
IPF3121	orf19.4438	Transcription factor activity	2.3688	P	1.44963	P	1.3032	P	2.1313	P	2.82229	P	1.13639	P	-1.11144	1.9469	-1.14679	0.346099	P	0.107337	P	0.13194	P	1.0262	P	0.86164	P	0.519461	P	2.96504	8.02743	3.93709	0.105317	P	0.0764273	P	0.262357	M	0.111004	P	0.0831663	P	0.0364865	A	1.054	1.08818	-7.19054
IPF3277	orf19.4384	Fructose transporter activity	0.633006	P	0.75645	P	1	P	1.33855	P	4.12934	P	2.02935	P	2.49411	5.28224	2.30609	0.232624	A	0.160156	P	0.238507	P	0.198712	A	0.132687	A	0.132485	A	-1.10088	1.2498	-1.95277	0.788344	P	0.55709	P	0.714829	P	0.446911	P	0.390782	P	0.583108	A	-1.5283	-1.41337	-1.4984
IPF3282	orf19.4384	Fructose transporter activity	2.88042	P	3.31173	P	3.39236	P	4.87901	P	13.2608	P	5.80883	P	1.69229	3.97805	1.7074	1.82128	M	1.69718	P	3.18149	P	1.60502	P	0.945278	A	0.950225	P	-1.00259	-1.81513	-3.34518	2.31033	P	1.436	P	2.64512	P	1.53475	P	1.18637	P	1.475	P	-1.42586	-1.21019	-1.65188
IPF3282.3eoc	orf19.4384	Fructose transporter activity	3.24019	P	3.10688	P	4.18652	P	5.36641	P	13.9495	P	6.58916	P	1.65621	4.48988	1.5739	3.05957	P	2.48607	P	4.20836	P	2.38011	P	1.46523	P	1.68114	P	-1.28548	-1.69672	-2.50328	2.8865	P	1.65562	P	3.12928	P	1.78861	P	1.32064	P	1.93243	P	-1.61382	-1.25365	-1.61935
IPF3352	orf19.4013	--	8.37836	P	5.1938	P	3.76787	P	9.53664	P	6.79075	P	4.74679	P	1.14702	1.32659	1.29682	4.55532	P	3.34341	P	2.07881	P	8.03042	P	7.59151	P	5.95284	P	1.77663	2.23211	2.7982	4.24489	P	4.9047	P	4.31369	P	4.15878	P	4.22545	P	3.77432	P	-1.01874	-1.14478	-1.03768
IPF3491	orf19.6753	--	2.59452	P	1.81204	P	1.44782	P	2.7229	P	2.35121	P	1.93013	P	1.04948	1.29755	1.33313	2.24586	P	2.09205	P	2.27642	P	3.99689	P	3.60542	P	3.38548	P	1.77967	1.72339	1.4872	5.28016	P	5.45856	P	7.15716	P	4.70077	P	6.06613	P	6.56892	P	-1.12325	1.11131	-1.08955
IPF3535	orf19.6840	--	0.405217	P	0.35043	P	0.433032	A	0.722901	P	0.818086	P	0.824204	P	1.77387	2.15365	4.20991	0.489362	P	0.533967	P	0.546269	P	1.16696	P	0.901537	P	0.959581	P	2.38466	1.68838	1.75661	1.05982	P	0.805709	P	0.951838	A	0.716699	P	0.562625	P	1.11486	M	-1.55352	-1.46969	1.7314
IPF3679	orf19.889	Transcription factor activity	0.494835	P	0.842752	P	0.430567	P	1.12595	P	1.2429	P	0.774176	P	2.27541	1.47481	1.79804	0.347518	P	0.543139	M	0.386269	P	0.35968	P	0.558565	P	0.384356	P	1.035	1.0284	-1.00498	0.537832	P	0.53407	P	0.944233	P	0.332046	P	0.330661	P	0.848649	P	-1.61975	-1.61516	-1.11263
IPF3836	orf19.279	Hydrolase activity, acting on ester bonds	3.83161	P	3.28993	P	4.10353	P	3.16183	P	4.05994	P	2.92342	P	-1.21183	1.23405	-1.40368	2.21087	P	1.58764	P	2.00896	P	1.9587	P	1.43851	P	3.05838	P	-1.12874	-1.10367	1.52238	2.16462	P	2.48435	P	4.26489	P	3.23359	P	3.65531	P	7.25676	P	1.49384	1.47134	1.70151
IPF3866	orf19.21	--	0.489153	P	0.404177	P	0.376335	M	0.354199	P	0.407992	P	0.372275	P	-1.38101	1.00944	-1.01091	0.441608	P	0.467731	P	0.330746	P	0.893428	P	0.741215	P	0.522081	P	2.02313	1.5847	1.57849	0.376278	P	0.338858	P	0.565272	P	0.361969	P	0.437876	P	0.821622	P	-1.03953	1.29221	1.4535
IPF3876	orf19.775	--	0.21436	P	0.193489	P	0.221035	A	0.40458	P	0.352261	P	0.233091	P	1.88739	1.82057	1.05454	0.266667	P	0.232677	P	0.0985075	P	0.399645	P	0.433748	P	0.284431	P	1.49867	1.86417	2.88741	0.237219	P	0.335175	P	0.205323	A	0.385135	P	0.344689	P	0.264865	P	1.62354	1.02839	1.28999
IPF3927	orf19.6506	--	0.423037	P	0.544226	P	0.491372	P	0.563359	P	0.343849	P	0.356065	P	1.3317	-1.58275	-1.38001	0.267139	P	0.255435	P	0.179701	P	0.420515	P	0.394949	P	0.551272	P	1.57414	1.54618	3.06771	1.29857	P	1.05893	P	1.25349	P	1.30888	P	1.20842	P	0.860811	P	1.00794	1.14117	-1.45617
IPF4059	orf19.1865	--	3.72727	P	4.40111	P	5.01972	P	5.6958	P	6.82282	P	7.55478	P	1.54003	1.55369	1.50752	3.72199	P	3.27004	P	3.75851	P	4.91874	P	4.25695	P	4.92272	P	1.32952	1.29133	1.28617	3.66411	P	2.99079	P	4.69772	P	3.1945	P	3.11673	P	4.75473	P	-1.14719	1.04224	1.13646
IPF4325	orf19.5523	--	0.158574	P	0.0964374	P	0.0895645	P	0.241985	P	0.15142	P	0.167132	P	1.526	1.57013	1.86606	0.141371	P	0.14572	P	0.081194	P	0.21492	P	0.331259	P	0.233907	P	1.52025	2.27326	2.88084	0.52454	P	0.740332	P	0.6109	P	0.561776	P	0.528056	P	0.348649	P	1.07099	-1.40199	-1.75219
IPF448	orf19.7051	--	0.117769	A	0.0325553	A	0.0345111	A	0.0656489	A	0.0189274	A	0.0558972	A	-1.79392	-1.72	1.61969	0.274232	P	0.384171	P	0.39403	P	0.719805	P	0.838214	P	0.742889	P	2.62481	2.18188	1.88536	0.470348	P	0.458564	P	0.0722433	A	0.28668	P	0.383768	P	0.483784	P	-1.64067	-1.1949	6.69659
IPF4567.3	orf19.6525	--	0.500517	P	0.657248	P	0.579293	P	0.460305	P	0.576236	P	0.4891	P	-1.08736	-1.14059	-1.18441	0.393381	P	0.474524	P	0.530149	P	0.73135	P	0.707906	P	0.985404	P	1.85914	1.49182	1.85873	0.773006	P	0.637201	P	0.434727	P	0.609073	P	0.588176	P	0.391892	P	-1.26915	-1.08335	-1.1093
IPF474	orf19.7060	--	0.440083	P	0.338452	M	0.714051	P	0.610687	P	0.529968	P	0.360537	P	1.38766	1.56586	-1.98052	0.520095	P	0.31284	P	0.429254	P	0.769094	P	0.617496	P	0.874251	P	1.47876	1.97384	2.03668	1.28119	P	1.13904	P	1.29278	P	0.960425	P	0.87976	P	1.09595	P	-1.33398	-1.29472	-1.1796
IPF480	orf19.7063	--	0.105372	P	0.146806	A	0.182416	A	0.0763359	A	0.139853	A	0.149245	P	-1.38037	-1.04972	-1.22225	0.204255	P	0.244905	P	0.42806	P	0.410746	P	0.442533	P	0.788548	P	2.01094	1.80696	1.84214	0.246421	P	0.206262	P	0.282636	P	0.226834	P	0.200401	P	0.340541	P	-1.08635	-1.02924	1.20487
IPF4835	orf19.5992	Transcription factor activity	2.35072	P	2.97973	P	3.83155	P	2.97405	P	3.98002	P	4.25154	P	1.26516	1.3357	1.10961	0.987707	P	1.10394	P	1.06149	P	2.80018	P	2.23646	P	4.18376	P	2.83503	2.02589	3.94139	0.478528	P	0.495856	P	0.828897	P	0.992278	P	0.81012	P	1.40676	P	2.25934	1.73913	1.67963
IPF4890	orf19.6263	Monocarboxylic acid transporter activity	20.7097	P	22.3034	P	22.6598	P	18.9557	P	24.6635	P	22.4248	P	-1.09253	1.10582	-1.01048	29.8534	P	18.7931	P	19.7027	P	16.2629	P	18.7225	P	20.2167	P	-1.83568	-1.00377	1.02609	4.89059	P	3.58287	P	2.10013	P	7.11197	P	6.17635	P	7.18649	P	1.45421	1.72385	3.42193
IPF511	orf19.7078	--	2.17407	P	1.51628	P	1.05382	P	1.3542	P	1.77655	P	1.25992	P	-1.61679	1.16371	1.21622	1.85532	P	1.75645	P	1.56716	P	3.55506	P	2.96248	P	2.76703	P	1.91295	1.71272	1.79604	0.99182	P	0.982044	P	0.948036	P	1.0222	P	1.14729	P	1.53851	P	1.02235	1.18124	1.82433
IPF525	orf19.7085	--	0.588326	P	0.570639	P	0.816352	A	0.803817	P	0.879075	A	0.598658	A	1.25037	1.39496	1.02909	0.87234	P	0.793988	P	0.792537	P	2.0282	P	1.3955	P	1.89671	P	2.53415	1.6891	2.31647	1.9228	P	1.71179	P	1.5545	A	2.23214	P	2.27555	P	1.08446	A	1.5016	1.36683	-1.5833
IPF538	orf19.7091	--	0.900826	P	0.896192	P	1.03369	P	0.854962	P	0.629863	P	0.887647	P	-1.05365	-1.42284	-1.16453	1.00284	P	1.20448	P	1.11284	P	1.47735	P	2.08858	P	2.50449	P	1.47317	1.734	2.25055	0.570552	P	0.517495	P	0.837769	P	0.57529	P	0.507014	P	0.975676	P	1.0083	-1.02067	1.16461
IPF539	orf19.7092	--	1.84401	P	2.03194	P	2.36483	P	2.46565	P	2.76972	P	2.20738	P	1.33711	1.36309	-1.07133	2.02175	P	1.81793	P	1.9009	P	3.12655	P	3.06296	P	3.80576	P	1.54646	1.68486	2.00209	1.67587	P	1.76243	P	1.2294	P	2.02896	P	2.12124	P	1.52838	P	1.21069	1.20359	1.24319
IPF5426	orf19.6378	--	0.339359	P	0.231572	P	0.322925	P	0.30458	P	0.17245	P	0.280604	P	-1.11419	-1.34284	-1.15082	0.313948	P	0.372622	P	0.373731	P	0.533748	P	0.543558	P	0.843937	P	1.70012	1.45874	2.25814	0.819018	P	0.990792	P	1.24081	P	1.22587	P	0.968938	P	0.793243	M	1.49675	-1.02255	-1.56423
IPF553	orf19.7096	--	2.08704	P	1.47912	P	1.5871	P	1.80763	P	2.14458	P	1.24064	P	-1.12871	1.43783	-1.25817	1.42577	P	1.0484	P	1.1991	P	2.2258	P	2.03514	P	2.27358	P	1.54948	1.90771	1.85745	1.36043	P	1.25368	P	1.19265	A	1.0888	P	1.10471	P	1.36622	P	-1.19589	-1.1152	1.09139
IPF5625	orf19.7112	Ferric-chelate reductase activity	0.72624	P	0.576167	P	0.502876	P	0.975954	P	0.770768	P	0.713807	P	1.35599	1.34376	1.75973	0.519622	P	0.470788	P	0.41403	P	1.05107	P	1.00238	P	1.11583	P	2.04995	2.17513	2.82952	0.634969	P	0.821363	P	0.503802	P	0.493726	P	0.708417	P	0.64527	P	-1.28024	-1.16212	1.27965
IPF568	orf19.7105	Cyclin-dependent protein kinase inhibitor activity	0.167355	P	0.216216	P	0.25719	A	0.210687	P	0.230284	P	0.130799	A	1.25892	1.06506	-1.96629	0.01	A	0.01	A	0.0131343	A	0.305062	P	0.217789	P	0.275823	P	30.5062	21.7789	21.0002	0.0746421	A	0.0662983	A	0.0240811	A	0.0704633	A	0.0731463	A	0.0162162	A	-1.0593	1.10329	-1.485
IPF5723.exon1	orf19.6329	--	1.89669	P	1.38514	P	1.66228	P	1.38397	P	1.66141	P	1.26048	P	-1.37047	1.19946	-1.31877	0.931442	P	0.676291	P	0.632836	P	0.386767	P	0.513543	P	0.476796	P	-2.40828	-1.31691	-1.32727	0.331288	P	0.344383	P	0.106464	A	0.544401	P	0.517034	P	0.398649	P	1.64329	1.50133	3.74445
IPF5987	orf19.7306	--	0.78719	P	0.681511	P	0.652835	P	35.7172	P	33.4564	P	40.6481	P	48.5753	49.4909	63.258	0.823641	P	0.779212	P	0.607463	P	31.6175	P	33.3496	P	33.8378	P	41.5423	50.1047	81.4263	0.44274	A	0.490332	P	0.498099	M	16.7249	P	16.7625	P	16.7507	P	45.4601	38.2299	35.6874
IPF6032	orf19.4607	--	0.347107	P	0.295455	P	0.206245	A	0.548855	P	0.600421	P	0.675238	P	1.58123	2.03219	3.27396	0.234043	P	0.259511	P	0.25194	P	0.401865	P	0.410322	P	0.364895	P	1.71706	1.58114	1.44834	0.347648	P	0.353591	P	0.190114	A	0.530888	P	0.697395	P	0.309459	P	1.52708	1.97232	1.62776
IPF6041	orf19.4612	--	1.43905	P	0.686118	P	0.459326	P	1.12366	P	1.0673	P	0.539408	P	-1.28068	1.55556	1.17435	0.66052	P	0.417799	P	0.393433	P	1.09281	P	0.954978	P	0.877994	P	1.65446	2.28574	2.23162	0.115542	P	0.177716	P	0.110266	A	0.254826	P	0.149299	P	0.347297	M	2.20549	-1.19034	3.14963
IPF6050	orf19.6737	--	0.621901	P	0.550369	P	0.493016	A	0.917557	P	0.826498	P	1.00112	P	1.47541	1.50172	2.0306	0.904964	P	1.02378	P	0.954627	P	0.837034	P	0.736823	P	0.531811	P	-1.08116	-1.38945	-1.79505	0.843558	P	0.837017	P	0.685678	P	0.866795	P	0.865731	P	0.864865	P	1.02755	1.03431	1.26133
IPF610	orf19.7631	--	0.097624	P	0.134521	A	0.202958	A	0.143511	P	0.241851	P	0.333706	P	1.47004	1.79787	1.64421	0.131442	P	0.159647	P	0.244179	P	0.128774	P	0.137994	P	0.150823	P	-1.02072	-1.15691	-1.61897	0.310838	P	0.164825	P	0.479087	P	0.263514	P	0.247495	P	0.437838	P	-1.17959	1.50156	-1.09421
IPF6203	orf19.4166	--	0.75	A	1.10074	P	1.06984	A	1.23435	P	2.27655	P	1.62661	P	1.6458	2.06821	1.52042	0.787707	P	0.759171	P	1.11881	P	0.85302	P	0.672035	P	1.29716	P	1.08291	-1.12966	1.15941	0.860941	P	0.633518	P	1.19645	P	0.824324	P	0.789579	P	0.82973	P	-1.04442	1.24634	-1.44198
IPF6235	orf19.5372	--	30.1389	P	21.7607	P	26.9043	P	31.5225	P	25.4926	P	25.0967	P	1.04811	1.17631	-1.07155	12.1783	P	7.38995	P	7.60806	P	22.5981	P	24.1982	P	23.4661	P	1.92902	3.39442	3.35293	21.1575	P	19.3881	P	9.07098	P	20.7196	P	21.2129	P	28.9581	P	-1.02058	1.09337	4.53558
IPF6238	orf19.2374	--	13.5015	P	10.3219	P	9.63476	P	16.1015	P	11.163	P	12.595	P	1.15244	1.02498	1.31274	4.87045	P	3.37058	P	3.33493	P	10.6241	P	11.694	P	9.02545	P	2.15914	3.44469	2.75793	10.6789	P	11.7652	P	2.77757	P	12.4957	P	12.8542	P	11.4818	P	1.25574	1.03491	3.85856
IPF6318	orf19.1664	--	0.573864	P	0.405405	P	0.396056	P	0.591603	P	0.55205	P	0.319173	P	1.03091	1.36172	-1.24088	0.547045	P	0.539402	P	0.36	P	0.833037	P	1.01464	P	1.27021	P	1.5228	1.88105	3.52836	0.423313	P	0.650092	P	0.337136	P	0.618726	P	0.60521	P	0.425676	P	1.46163	-1.07416	1.26262
IPF643	orf19.7610	Protein tyrosine phosphotase activity	2.40083	P	3.13114	P	2.57888	P	3.07634	P	2.77287	P	3.0422	P	1.30462	-1.12156	1.2063	1.95508	P	1.94514	P	1.37701	P	1.54418	P	2.10121	P	2.54959	P	-1.26561	1.06928	1.83122	0.996932	P	1.12155	P	0.515843	P	1.90685	P	1.91533	P	1.44932	P	1.92075	1.70941	2.96121
IPF6444	orf19.1900	--	0.101756	P	0.132064	A	0.114215	A	0.122137	A	0.0998949	A	0.155394	P	1.20029	-1.32203	1.36054	0.0472813	A	0.032269	A	0.0298507	A	0.107904	P	0.100659	P	0.0467814	P	2.28217	3.11937	1.56718	0.223926	P	0.255985	P	0.273764	P	0.297297	P	0.272545	P	0.177027	A	1.32766	1.06469	-1.54645
IPF6518	orf19.1691	--	12.5718	P	3.01536	P	1.43878	P	18.7618	P	10.6341	P	5.01397	P	1.49237	3.52664	3.48487	9.27163	P	5.78686	P	3.33373	P	18.2755	P	18.4993	P	14.7509	P	1.97205	3.19607	4.44997	2.64213	P	6.38582	P	0.111534	A	3.29247	P	5.499	P	0.287838	P	1.24614	-1.16127	2.58073
IPF7171.3f	orf19.5372	--	0.142045	P	0.170762	P	0.134758	A	0.272519	P	0.374343	P	0.237004	P	1.91853	2.19219	1.75874	0.177778	P	0.160666	P	0.139104	P	0.4627	P	0.13104	P	0.138473	P	2.60269	-1.22609	-1.00456	0.243354	P	0.103131	P	0.367554	A	0.23166	P	0.0881764	P	0.185135	A	-1.05048	-1.1696	-1.98533
IPF7204	orf19.2475	--	5.26188	P	3.32586	P	4.09408	P	1.63092	P	2.20347	P	2.54695	P	-3.21935	-1.4313	-1.56977	2.55272	P	1.4302	P	3.1006	P	7.15586	P	8.58583	P	8.70677	P	2.80356	6.04826	2.88279	0.58998	P	0.622928	P	0.87199	M	0.875965	P	0.686874	P	1.17703	P	1.48513	1.10391	1.36653
IPF730	orf19.5362	--	0.940083	P	1.20823	P	1.31183	P	0.836641	P	1.09411	P	0.71716	P	-1.09032	-1.10895	-1.85678	0.0763948	A	0.0825408	A	0.158507	A	0.327265	P	0.321742	P	0.412238	P	13.2971	3.65589	3.87102	0.150307	A	0.176796	A	0.280101	A	0.121139	A	0.152305	A	0.232432	A	1.07866	-1.0932	-1.4525
IPF7397	orf19.1800	--	0.987087	P	1.6812	P	0.691454	P	2.12595	P	3.08885	P	1.53689	P	2.16654	1.85001	2.35685	1.23026	P	1.16729	P	1.2006	P	1.82305	P	1.79228	P	1.57148	P	1.59694	1.50772	1.31787	1.341	P	1.92219	P	1.76172	P	1.111	P	1.21493	P	0.741216	P	-1.19369	-1.58192	-2.47027
IPF7456	orf19.2047	--	3.78977	P	1.76658	P	1.55629	P	3.18092	P	3.00316	P	1.37954	P	-1.19141	1.69998	-1.12812	1.92388	P	1.1926	P	1.20418	P	3.06572	P	2.52269	P	2.02208	P	1.59351	2.1153	1.67922	0.670757	P	0.882136	P	0.732573	P	0.90251	P	1.41082	P	1.04865	P	1.34551	1.59932	1.43146
IPF7493	orf19.4682	Glucose transporter activity	0.150826	P	0.259828	P	0.105998	A	0.225954	P	2.93375	P	1.00335	P	1.49811	11.2911	9.46575	0.209929	P	0.253736	P	0.397015	P	1.22336	P	0.539531	P	1.25898	P	5.82748	2.12635	3.17112	0.719836	P	0.414365	P	0.026616	A	0.256757	P	0.206413	P	0.01	A	-2.80357	-2.00746	-2.6616
IPF7602	orf19.6837	--	40.6676	P	36.4487	P	47.0723	P	35.3542	P	40.3086	P	37.6968	P	-1.13151	1.11196	-1.2563	32.3617	P	22.4071	P	22.049	P	17.5164	P	21.4561	P	24.0874	P	-1.84793	-1.04732	1.08022	8.27301	P	7.32228	P	13.3251	P	13.4913	P	12.985	P	25.6831	P	1.61948	1.76188	1.91921
IPF7655.5eoc	orf19.856	--	0.205578	A	0.183047	A	0.0821693	A	0.535114	P	0.464774	P	0.353829	P	2.60297	2.5391	4.3061	0.0817967	A	0.122622	A	0.130149	A	0.148757	A	0.120425	A	0.0965569	A	1.81862	-1.01825	-1.3479	0.211656	P	0.304788	P	0.0646388	A	0.283784	P	0.233467	P	0.337838	A	1.34078	-1.30549	5.22655
IPF7666	orf19.4056	Transcription factor activity	0.633006	M	0.646806	P	1.2046	P	1.67595	P	2.66299	P	3.67328	P	2.54413	3.88073	3.27926	0.407565	A	0.59358	P	0.686567	P	1.01798	P	0.621889	P	0.978481	P	2.27632	1.01246	1.28656	0.369632	P	0.524862	P	0.506337	A	1.21815	P	1.15681	P	1.26824	P	3.18962	2.30808	3.51017
IPF7686	orf19.1395	Inorganic phosphate transporter activity	2.17355	P	1.68305	P	1.31882	P	3.67863	P	3.92324	P	2.56233	P	1.69245	2.33103	1.9429	1.06147	P	0.920177	P	0.88	P	0.902753	P	1.12775	P	1.26759	P	-1.17581	1.22557	1.44044	0.904908	P	0.77256	P	1.37262	P	0.789575	P	0.858717	P	1.34595	P	-1.14607	1.11152	-1.01982
IPF7770	orf19.3881	--	0.821281	P	0.624693	P	0.440427	P	1.22443	P	0.977918	P	0.410285	P	1.49088	1.56544	-1.07347	0.307329	P	0.267323	P	0.232239	P	0.555506	P	0.429722	P	0.490644	P	1.80753	1.6075	2.11267	0.48773	P	0.56814	P	0.42839	P	0.50193	P	0.596192	P	0.259459	P	1.02912	1.04938	-1.65109
IPF7817	orf19.3131	NADPH dehydrogenase activity	1.68853	P	1.53808	P	1.50246	P	15.8672	P	20.7429	P	19.0771	P	9.39431	13.6546	13.4448	0.867612	A	0.570482	P	0.885075	M	6.44361	P	6.37537	P	7.77152	P	7.73983	11.0298	8.2489	0.541411	P	0.426335	P	0.401774	A	6.51786	P	5.78357	P	11.4486	P	11.8331	13.3282	84.1816
IPF7863	orf19.1449	--	0.216942	P	0.189189	P	0.280608	P	1.28397	P	1.70452	P	2.42398	P	6.07964	9.38407	9.10601	0.159574	P	0.142154	P	0.151045	P	1.12966	P	1.00586	P	0.813997	P	7.16934	7.19636	5.65816	0.148773	P	0.118785	P	0.198986	A	0.965251	P	1.1022	P	1.09054	P	6.50067	9.50409	5.66334
IPF7940	orf19.6608	--	0.608988	P	0.34398	P	0.224322	P	3.26183	P	1.46372	P	2.29961	P	5.35616	4.25525	10.2514	0.235934	P	0.248641	P	0.0477612	P	1.01776	P	1.29722	P	0.963698	P	4.31376	5.21723	20.1774	0.111452	P	0.226519	P	0.209125	P	0.714286	P	0.583166	P	0.205405	P	6.40891	2.57447	-1.01811
IPF7947	orf19.6602	--	1.63068	P	1.10258	P	0.709943	P	1.09313	P	0.906414	P	1.48854	P	-1.49176	-1.21642	2.09671	1.58251	P	2.0856	P	1.33433	P	2.47513	P	3.07577	P	2.58907	P	1.56406	1.47477	1.94036	0.885481	P	1.20258	P	0.334601	A	1.10811	P	1.13026	P	0.527027	P	1.25142	-1.06398	1.57509
IPF7968	orf19.2693	Transcription corepressor activity	0.907541	P	0.44226	P	0.317995	P	0.8	P	0.615142	P	0.418111	P	-1.13443	1.3909	1.31483	1.04444	P	0.813859	P	0.561194	P	1.51554	P	1.37665	P	0.99738	P	1.45105	1.69151	1.77725	0.374233	P	0.325967	P	0.376426	A	0.506757	P	0.477956	P	0.335135	P	1.35412	1.46627	-1.12321
IPF8016	orf19.1336.2	--	0.329029	M	0.290541	A	0.140509	A	0.323664	A	0.15142	A	0.257686	A	-1.01658	-1.91878	1.83394	0.640662	P	1.04891	P	0.291343	P	1.06261	P	1.77489	P	1.25524	P	1.65861	1.69212	4.30846	0.157464	P	0.311234	P	0.0152091	A	0.344595	P	0.256513	P	0.208108	P	2.1884	-1.21333	13.6831
IPF8024	orf19.1334	--	1.22262	P	1.0473	P	1.2424	P	0.790076	P	0.758149	P	0.993292	P	-1.54748	-1.38139	-1.25079	1.05768	P	1.02819	P	0.958806	P	1.65142	P	1.81223	P	2.17777	P	1.56136	1.76253	2.27133	1.02249	P	1.093	P	0.38403	P	0.862934	P	1.08918	P	0.389189	M	-1.1849	-1.00351	1.01343
IPF8067	orf19.3697	--	0.0924587	M	0.0190418	A	0.0131471	A	0.145802	P	0.0273396	A	0.0335383	A	1.57694	1.43577	2.55101	0.0255319	A	0.113111	P	0.0561194	P	0.0754885	P	0.270498	P	0.0961826	P	2.95663	2.39143	1.71389	0.0122699	A	0.0561694	P	0.017744	A	0.0434363	P	0.0841683	P	0.0216216	A	3.54006	1.49847	1.21853
IPF8147	orf19.6200	--	0.179752	P	0.0902948	A	0.31553	A	0.430534	P	0.764459	P	0.504751	P	2.39516	8.46625	1.59969	0.119149	A	0.092731	A	0.0161194	A	0.0466252	A	0.0479502	A	0.058009	A	-2.55546	-1.9339	3.5987	0.0132924	A	0.0128913	A	0.0405577	A	0.034749	A	0.0150301	A	0.0243243	A	2.6142	1.1659	-1.66737
IPF8378	orf19.6072	--	0.429236	P	0.535627	P	0.531635	P	0.812977	P	0.376446	P	0.694802	P	1.89401	-1.42285	1.30691	0.172577	M	0.23981	P	0.30209	M	0.325044	P	0.364202	P	0.496632	P	1.88348	1.51871	1.64399	0.717791	P	0.639963	P	0.826362	A	0.830116	P	0.673347	P	0.874324	M	1.15649	1.05216	1.05804
IPF8439	orf19.6498	--	0.83626	P	0.689496	P	0.905095	P	1.08015	P	0.64511	P	0.63611	P	1.31687	-1.01759	-1.52011	0.6026	P	0.505944	P	0.498209	P	1.00022	P	0.8653	P	1.10797	P	1.74948	1.77259	2.71382	1.30419	P	0.950276	P	1.03676	P	0.866313	P	0.846192	P	1.19459	P	-1.46276	-1.13507	1.15241
IPF8591	orf19.5862	Arginase activity	0.123192	A	0.112101	P	0.0554643	A	0.3	P	0.321767	P	0.349637	P	2.45091	3.0911	7.03571	0.0910166	A	0.0477242	A	0.0728358	A	0.089698	A	0.0872987	A	0.0924401	A	1.01841	2.00072	1.91113	0.0444785	A	0.0828729	A	0.141318	A	0.0699807	A	0.0621242	A	0.108108	A	1.84376	-1.29591	-1.22735
IPF8627	orf19.3969	Specific transcriptional repressor activity	0.721074	P	0.702703	P	0.819228	P	2.00076	P	1.87066	P	1.44774	P	2.7747	2.6621	1.7672	0.965957	P	0.918139	P	0.684179	P	1.13677	P	0.857979	P	0.875748	P	1.17683	-1.07012	1.28	0.379346	P	0.423573	P	0.380228	P	0.503861	P	0.569138	P	0.87973	P	1.32824	1.34366	2.31369
IPF867	orf19.7221	NAD-dependent histone deacetylase activity	0.348141	A	0.539926	P	0.52917	P	0.829771	P	0.880126	P	0.81498	P	2.38344	1.63009	1.54011	0.659102	P	0.764266	P	1.08478	P	1.37522	P	1.17277	P	1.69199	P	2.08651	1.5345	1.55976	1.23108	P	0.984346	P	1.56274	P	1.08108	P	1.01703	P	0.785135	P	-1.13875	1.03321	-1.99041
IPF8951	orf19.4897	--	1.14799	P	1.0688	P	0.757601	P	1.88092	P	1.39064	P	1.60034	P	1.65209	1.27542	2.07709	1.36572	P	1.41372	P	1.26149	P	3.02198	P	2.99286	P	2.94985	P	2.11967	2.09402	2.28914	1.62117	P	2.04144	P	1.8872	P	2.99083	P	3.26303	P	1.61554	P	1.95448	1.60809	-1.09699
IPF8970	orf19.496	--	1.1671	P	1.41339	P	1.40099	P	3.18092	P	2.81073	P	1.94047	P	2.80391	2.08522	1.38627	0.519385	P	0.666101	P	0.627463	P	1.82549	P	1.69821	P	1.89334	P	3.58427	2.51405	2.90359	1.16564	P	1.05617	P	1.4417	P	1.19546	P	0.96994	P	0.946622	P	1.0304	-1.09418	-1.5708
IPF8976	orf19.1369	--	0.111054	P	0.105037	P	0.0287592	A	0.577863	P	0.600421	P	0.428731	P	5.20345	5.71628	14.9076	0.114421	A	0.0825408	P	0.164776	A	0.708703	P	0.603953	P	0.657186	P	6.19383	7.31703	3.98835	0.737219	P	0.463168	P	0.760456	P	0.858108	P	1.07315	P	0.643243	P	1.16398	2.31697	-1.18222
IPF9370	orf19.1424	--	0.689566	P	0.833538	P	0.54396	P	1.12137	P	1.70242	P	1.15204	P	1.6262	2.0424	2.11788	0.731915	P	0.717391	P	0.821493	P	0.798401	P	0.831625	P	1.04678	P	1.09084	1.15923	1.27424	0.496932	P	0.341621	P	0.43853	A	0.388996	P	0.406814	P	0.104054	A	-1.27747	1.19083	-4.21444
IPF9410	orf19.6148	Structural constituent of cytoskeleton	0.259814	P	0.364251	P	0.400986	A	0.652672	P	0.566772	P	0.679709	P	2.51207	1.55599	1.6951	0.132388	A	0.172894	A	0.228657	P	0.185169	P	0.24634	A	0.257859	A	1.39869	1.4248	1.12771	0.447853	P	0.395028	P	1.02535	P	0.24807	P	0.345691	P	0.482432	P	-1.80535	-1.14272	-2.12537
IPF9450	orf19.4370	--	0.529442	A	0.480958	A	0.461791	A	0.500763	M	0.540484	P	0.447736	M	-1.05727	1.12376	-1.03139	0.365485	P	0.439878	P	0.327761	P	0.853908	P	0.718155	P	0.637725	P	2.33637	1.63262	1.9457	0.398773	P	0.453039	P	0.732573	P	0.559846	P	0.839679	P	0.937838	P	1.40392	1.85344	1.2802
IPF9496	orf19.2809	Carnitine O-acetyltransferase activity	0.141529	A	0.170762	A	0.182416	A	0.321374	P	0.989485	P	0.459475	P	2.27073	5.79454	2.51883	0.131442	A	0.129076	A	0.112239	A	0.289076	P	0.194729	P	0.329341	P	2.19927	1.50864	2.93429	0.230061	P	0.183241	P	0.257288	P	0.104247	P	0.0851703	P	0.208108	P	-2.20689	-2.15147	-1.23632
IPF9538	orf19.271	2,4-dienoyl-CoA reductase (NADPH) activity	0.227789	A	0.111794	A	0.285127	A	24.816	P	31.2471	P	37.5651	P	108.943	279.507	131.749	0.340426	A	0.11413	A	0.160597	M	2.64165	P	2.79319	P	2.90719	P	7.75985	24.4737	18.1024	0.0623722	A	0.0782689	A	0.114068	A	1.81853	P	2.29459	P	3.15	P	29.1561	29.3168	27.615
IPF9704	orf19.4882	General RNA polymerase II transcription factor activity	1.23709	P	1.51044	P	1.31964	P	1.89466	P	1.14827	P	1.63164	P	1.53155	-1.31541	1.23643	0.315839	P	0.409986	P	0.377313	P	0.48135	P	0.745242	P	0.783683	P	1.52403	1.81772	2.07701	1.38446	P	1.46777	P	1.06971	P	1.72201	P	1.43888	P	1.58378	P	1.24381	-1.02008	1.48058
IPF9748	orf19.746	--	0.254132	P	0.372236	P	0.396878	P	0.722901	P	0.303891	P	0.614869	P	2.84458	-1.2249	1.54927	0.136643	P	0.205842	P	0.139104	P	0.206927	P	0.375183	P	0.52732	P	1.51436	1.82267	3.79082	0.216769	P	0.29558	P	0.553866	P	0.326255	P	0.196393	P	0.258108	P	1.50508	-1.50505	-2.14587
IPF9828	orf19.6861	Protein binding	0.159091	P	0.305283	P	0.339359	A	0.179389	M	0.123028	A	0.320291	P	1.12759	-2.4814	-1.05953	0.179196	P	0.13553	P	0.0829851	A	0.329929	M	0.256589	P	0.291542	P	1.84116	1.89322	3.51318	0.130879	P	0.164825	P	0.0874525	A	0.147683	P	0.0961924	P	0.0364865	A	1.12839	-1.71349	-2.39685
IPF9887.3eoc	orf19.1240	--	1.48735	P	1.35104	P	1.1742	P	4.19427	P	4.22135	P	4.41476	P	2.82198	3.14774	3.76257	1.0539	P	1.00306	P	0.698507	P	3.15919	P	4.21212	P	4.10928	P	2.93223	4.15296	5.76807	0.58589	P	0.565378	P	0.852345	P	2.40444	P	2.39279	P	2.90405	P	4.06194	4.23037	5.53324
IQG1	orf19.6536	Cytoskeletal protein binding	2.03383	P	1.65479	P	1.57231	P	1.8813	P	1.80074	P	1.78871	P	-1.03568	-1.03155	1.15929	1.58298	P	1.61464	P	1.25791	P	2.63277	P	2.92917	P	3.47848	P	1.65702	1.83183	2.77841	1.65593	P	1.68831	P	1.15463	P	1.80743	P	2.05511	P	2.1527	P	1.08971	1.17976	2.72955
KAP114	orf19.7086	Protein carrier activity	3.3311	P	2.85688	P	1.50534	P	3.11374	P	2.35121	P	1.37619	P	-1.06981	-1.21507	-1.09385	2.48416	P	2.07099	P	1.89254	P	3.71625	P	3.86676	P	4.72567	P	1.49598	1.86711	2.497	1.52658	P	1.69337	P	0.550063	P	1.5888	P	1.59719	P	1.02838	P	1.04076	-1.06022	1.86956
KEX1	orf19.7020	Carboxypeptidase D activity	6.10692	P	6.57002	P	5.51602	P	6.3	P	6.72555	P	5.36613	P	1.03162	1.02367	-1.02793	3.68322	P	3.49389	P	3.8603	P	5.64565	P	6.16288	P	8.3372	P	1.5328	1.76391	2.15973	1.58896	P	1.59669	P	1.26236	P	2.00676	P	2.24248	P	3.86487	P	1.26294	1.40446	3.06163
KIN3	orf19.5325	Protein kinase activity	0.341942	P	0.382064	P	0.389482	P	0.267176	P	0.311251	P	0.351593	P	-1.27984	-1.22751	-1.10776	0.285106	P	0.36413	P	0.336119	P	0.569716	P	0.662518	P	1.19424	P	1.99826	1.81945	3.55301	0.331288	P	0.321363	P	0.391635	P	0.457529	P	0.440882	P	0.355405	P	1.38106	1.37191	-1.10194
LPI9	orf19.6544	--	0.785124	P	0.913391	P	0.721446	P	0.854962	P	0.946372	P	0.53829	P	1.08895	1.03611	-1.34026	0.67234	P	0.558084	P	0.547463	P	1.46181	P	1.00805	P	0.964446	P	2.17421	1.80627	1.76167	0.95092	P	1.03223	P	2.14068	P	0.905405	P	1.26754	P	0.506757	P	-1.05027	1.22796	-4.22428
LYS21	orf19.4506	Homocitrate synthase activity	8.04029	P	7.0301	P	5.33936	P	3.56412	P	2.78233	P	4.51034	P	-2.2559	-2.52669	-1.1838	1.2974	P	1.20313	P	1.3797	P	1.0413	P	1.03184	P	1.18376	P	-1.24595	-1.16599	-1.16553	1.1319	P	0.951197	P	1.30925	P	1.7249	P	2.67836	P	4.49324	P	1.5239	2.81577	3.43192
MDM12	orf19.6900	--	0.486829	P	0.616708	P	0.72802	P	0.675954	P	0.538381	P	0.60313	P	1.37168	-1.24387	-1.09567	0.849173	P	0.730299	P	0.694627	P	1.71758	P	1.15172	P	1.34263	P	1.98119	1.65594	2.25532	0.829243	P	0.78453	P	0.683143	P	0.839286	P	0.667836	P	0.676351	P	1.27384	-1.2842	1.15616
MDR1	orf19.5604	Multidrug transporter activity	0.832128	P	0.69226	P	1.03643	P	17.6511	P	32.8458	P	50.7939	P	47.8428	152.143	112.178	0.727975	A	0.452559	M	0.599204	M	29.6698	P	27.1486	P	20.6307	P	116.162	181.239	210.282	0.332652	P	0.252302	M	0.73215	P	22.9286	P	22.5969	P	60.7374	P	97.0864	169.518	132.322
MET13	orf19.288	Structural constituent of ribosome	3.79907	P	4.01044	P	3.83237	P	3.66794	P	3.39537	P	5.21632	P	-1.03575	-1.18115	1.36112	1.60756	P	1.37976	P	0.913433	A	0.39254	M	0.999268	M	0.68488	P	-4.09529	-1.38077	-1.33371	0.627812	P	1.00829	P	0.617237	A	1.14672	P	1.70441	P	1.70135	P	1.82653	1.6904	2.7564
MGM1	orf19.2690	GTPase activity	0.631198	P	0.623464	P	0.488907	P	0.721374	P	0.568875	P	0.682504	P	1.14286	-1.09596	1.39598	0.386288	P	0.463655	P	0.294925	P	0.66119	P	0.691801	P	0.635479	P	1.71165	1.49206	2.15471	0.358896	P	0.41989	P	0.220532	A	0.485521	P	0.461924	P	0.321622	P	1.35282	1.10011	1.45839
MRE11	orf19.6915	3'-5' exonuclease activity	0.996901	P	1.23956	A	1.02136	P	1.24046	P	0.969506	P	0.842929	P	1.24431	-1.27855	-1.21168	0.681797	P	0.695992	P	0.655522	P	1.38632	P	1.29026	P	1.12762	P	2.03334	1.85385	1.72018	1.75358	P	2.10313	P	1.33587	P	1.67471	P	2.13026	P	2.75405	P	-1.04709	1.0129	2.06162
MRF1	orf19.1149	DNA binding	1.71333	P	1.24079	P	1.04766	P	2.77786	P	2.15247	P	2.8379	P	1.62133	1.73476	2.7088	1.19433	P	0.767323	P	0.50806	P	0.696714	P	0.699121	P	0.561377	P	-1.71423	-1.09755	1.10494	0.55726	P	0.629834	P	0.413181	P	0.532818	P	0.627255	P	0.497297	P	-1.04587	-1.00411	1.20358
MRR1	orf19.7372	RNA polymerase II transcription factor activity	0.220041	A	0.541769	P	0.410025	A	0.555725	P	0.923239	P	1.72387	P	2.7718	1.79856	5.73848	0.716785	P	1.14657	P	1.29433	P	1.89432	P	2.10926	P	2.58439	P	2.85127	1.80283	1.9149	0.688139	P	0.517035	P	1.07985	P	1.59459	P	1.66132	P	3.70811	P	2.32999	3.35204	4.66252
MSD1	orf19.4478	Aspartate-tRNA ligase activity	2.34298	P	1.95025	P	2.05095	P	2.66641	P	2.0368	P	1.81666	P	1.13805	1.04438	-1.12897	1.33381	P	1.48505	P	1.26149	P	2.06039	P	2.25366	P	2.21557	P	1.54475	1.51756	1.75631	1.1227	P	1.08287	P	1.07098	P	1.10039	P	1.03006	P	0.878378	P	-1.02028	-1.05127	-1.21926
MSK1	orf19.6533	Lysine-tRNA ligase activity	0.678719	P	0.531327	P	0.590797	P	0.596947	P	0.519453	P	0.487982	P	-1.13698	-1.02286	-1.21069	0.917731	P	0.845788	P	0.706269	P	1.36901	P	1.36896	P	1.6875	P	1.49173	1.61856	2.38932	0.526585	P	0.479742	P	0.935361	P	0.546332	P	0.498998	P	0.694595	P	1.0375	1.04014	-1.34663
NDH2	orf19.5713	NADH dehydrogenase activity	0.270145	P	0.340909	P	0.574363	P	0.530534	P	0.901157	P	0.901621	P	1.96389	2.64339	1.56978	0.291017	P	0.194633	P	0.228657	P	0.843028	P	0.781845	P	0.999252	P	2.92912	4.04294	4.73816	0.196319	P	0.150092	P	0.0481622	A	0.415058	P	0.378758	P	0.527027	P	2.1142	2.5235	10.9427
OPT1	orf19.2602	Oligopeptide transporter activity	39.0868	P	40.6333	P	48.8965	P	24.6916	P	43.6661	P	22.083	P	-1.58309	1.07305	-2.21838	32.8981	P	21.6953	P	29.8415	P	7.22913	P	8.98975	P	6.9113	P	-4.5215	-2.41021	-4.36866	4.6411	P	3.90193	P	4.75856	P	8.10473	P	9.20842	P	13.9405	P	1.77221	2.37675	3.042
PAP11	orf19.3197	RNA binding	0.01	A	0.0632678	A	0.0147905	A	0.0473282	A	0.0168244	A	0.01	A	4.73282	-3.76048	-1.47905	2.12861	P	2.22385	P	2.29433	P	4.62167	P	5.14092	P	5.84805	P	2.17122	2.31173	2.54892	1.29959	P	0.958564	P	0.373891	A	1.00097	P	1.4519	P	0.828378	P	-1.29834	1.51467	2.21556
PET112	orf19.2494	--	0.198864	P	0.195332	P	0.230074	A	0.241221	P	0.266036	A	0.168809	P	1.213	1.36197	-1.36292	0.0869976	A	0.178329	P	0.13791	A	0.210924	P	0.269766	P	0.228668	P	2.42448	1.51274	1.65809	0.325153	P	0.338858	P	0.320659	A	0.451737	P	0.361723	P	0.431081	P	1.38931	1.06748	1.34436
PET8	orf19.7082	Transporter activity	2.94421	P	2.86302	P	3.28513	P	2.87023	P	3.14827	P	2.84684	P	-1.02578	1.09963	-1.15395	3.18913	P	2.59409	P	3.29373	P	4.72602	P	4.29941	P	7.64746	P	1.48192	1.65739	2.32182	2.16667	P	2.06169	P	4.74525	P	2.28861	P	2.28256	P	1.89189	P	1.05628	1.10713	-2.5082
PEX17	orf19.3605	--	0.382231	P	0.44226	P	0.548891	P	0.961832	P	0.691903	P	0.832868	P	2.51636	1.56447	1.51737	0.612766	P	0.755775	P	0.454925	P	1.01288	P	0.941435	P	0.721931	P	1.65296	1.24566	1.58692	1.02147	P	0.871087	P	0.439797	A	0.661197	P	0.630261	P	0.493243	P	-1.54488	-1.38211	1.12152
PEX4	orf19.4041	Ubiquitin conjugating enzyme activity	2.73657	P	1.98096	P	2.62531	P	2.71298	P	3.55836	P	1.763	P	-1.0087	1.79628	-1.48912	1.55225	P	1.25849	P	1.15761	P	2.25311	P	1.83565	P	2.09394	P	1.45152	1.45861	1.80884	1.90286	P	1.75506	P	3.1597	P	1.21622	P	1.62325	P	0.87973	P	-1.56458	-1.08121	-3.59167
PHR1	orf19.3829	1,3-beta-glucanosyltransferase activity	15.6767	P	14.3725	P	19.2305	P	29.7462	P	33.9911	P	29.0154	P	1.92736	2.36604	1.51397	13.5092	P	14.8565	P	21.1155	P	11.7826	P	10.4513	P	9.95902	P	-1.05915	-1.42708	-2.08778	9.8093	P	6.60912	P	10.8365	P	9.58156	P	9.10922	P	12.7804	P	-1.04079	1.41782	1.2179
PIB1	orf19.7547	Ubiquitin-protein ligase activity	1.93543	P	2.14373	P	2.35168	P	2.87481	P	3.13565	P	1.73002	P	1.48536	1.4627	-1.35934	1.59527	P	1.39844	P	1.30985	P	2.74645	P	2.74195	P	3.73391	P	1.72162	1.96072	2.85064	1.61247	P	1.8361	P	2.18631	P	1.56564	P	1.36874	P	1.45541	P	-1.02992	-1.34145	-1.5022
PLB4.3f	orf19.1442	Lysophospholipase activity	4.58678	P	4.14496	P	3.13394	P	2.61183	P	4.5694	P	3.25713	P	-1.75492	1.09939	1.03816	1.95626	P	1.68071	P	1.22955	P	3.80706	P	4.23389	P	5.34207	P	1.94551	2.56014	4.32454	0.623722	P	0.549724	P	0.297845	A	0.500483	P	0.428858	P	0.203378	M	-1.23676	-1.26755	-1.16729
POL0	orf19.5373	--	7.93104	P	6.31726	P	6.86196	P	10.2317	P	7.88223	P	8.66238	P	1.39037	1.31094	1.43474	2.40402	P	1.71213	P	1.57881	P	6.72092	P	7.04667	P	6.39633	P	3.03679	4.21958	3.87048	12.7428	P	11.4033	P	6.62484	P	12.5787	P	10.8838	P	11.3682	P	-1.01158	-1.04166	1.69398
POL3.5eoc	orf19.5182	Delta DNA polymerase activity	0.406508	P	0.353808	P	0.53903	P	0.735115	P	0.660358	P	0.856903	P	1.80836	1.86643	1.58971	0.0718676	A	0.119226	P	0.205373	P	0.205151	P	0.199488	P	0.0475299	A	2.85457	1.67319	-4.32092	0.470348	P	0.564457	P	0.627376	P	0.727799	P	0.487976	P	0.517568	P	1.54736	-1.15673	-1.21216
POT13	orf19.2046	Acetyl-CoA C-acyltransferase activity	0.736054	P	0.555283	P	0.708299	P	0.838168	P	1.02419	P	0.966462	P	1.13873	1.84444	1.36448	0.802364	P	0.623302	P	0.738507	P	1.18517	P	0.927526	P	1.59843	P	1.4771	1.48808	2.1644	0.676892	P	0.614181	P	0.751584	P	0.606178	P	0.599198	P	0.698649	P	-1.11666	-1.025	-1.07577
PRE10	orf19.6582	Endopeptidase activity	2.57231	P	1.60074	P	0.850863	P	2.14008	P	1.23502	P	1.50168	P	-1.19067	-1.26161	1.70143	2.41726	P	2.78023	P	2.21373	P	4.42607	P	5.16014	P	5.32784	P	1.93238	1.88705	2.41048	2.13344	P	2.34853	P	2.85234	P	2.2027	P	2.21443	P	2.02838	P	1.28434	-1.11351	-1.20524
PRE5	orf19.7178	Endopeptidase activity	4.32541	P	3.60012	P	3.40345	P	3.4687	P	3.96425	P	3.29849	P	-1.24698	1.10114	-1.03182	4.52624	P	4.03533	P	4.19403	P	6.92451	P	6.08602	P	6.62463	P	1.52986	1.50818	1.57954	5.58589	P	4.96869	P	12.948	P	4.25386	P	4.46192	P	5.90811	P	-1.31313	-1.11358	-2.19157
PRY2	orf19.7218	--	1.02066	P	1.20516	P	0.976993	P	1.13664	P	1.27655	P	0.874231	P	1.11363	1.05924	-1.11754	2.24823	P	2.37126	P	2.67821	P	7.67407	P	6.31735	P	6.92328	P	3.41339	2.66413	2.58504	1.70245	P	1.20074	P	1.86312	P	1.32336	P	1.31563	P	1.42568	P	-1.28646	1.09569	-1.30683
PYC2.exon1	orf19.789	Pyruvate carboxylase activity	0.749483	P	1.41585	P	1.17502	P	1.60611	P	2.1388	P	5.60369	P	2.14295	1.51062	4.76901	0.0964539	P	0.0886549	P	0.460298	P	0.131439	P	0.130307	P	0.0797156	M	1.36271	1.46983	-5.77426	1.4591	P	1.41068	P	1.39544	P	2.40347	P	2.36373	P	2.98649	P	1.64723	1.67559	2.14018
PYC2.exon2	orf19.789	Pyruvate carboxylase activity	24.7676	P	26.0221	P	26.7732	P	31.5389	P	20.2271	P	29.7563	P	1.2734	-1.2865	1.11142	21.0638	P	18.301	P	13.7648	P	14.9645	P	22.299	P	22.8552	P	-1.40759	1.21846	1.66041	5.11656	P	4.73757	P	6.327	P	8.33108	P	8.74449	P	9.68648	P	1.62826	1.84578	1.53098
RBT1	orf19.1327	--	51.0641	P	45.3348	P	64.097	P	43.613	P	54.6215	P	52.7099	P	-1.17085	1.20485	-1.21603	1.01891	P	0.80265	P	2.35821	P	0.75222	P	0.603221	P	1.03106	A	-1.35454	-1.33061	-2.28716	0.702454	P	1.04236	P	1.29785	A	1.27124	P	1.56814	P	2.67973	P	1.80971	1.50441	2.06475
RBT4	orf19.6202	--	4.32774	P	4.05344	P	4.34182	P	15.3607	P	12.9732	P	13.6769	P	3.62208	3.27815	3.15154	3.83357	P	4.36838	P	6.07821	P	4.62966	P	2.89568	P	2.54061	P	1.21321	-1.49223	-2.41712	2.90184	P	1.84346	P	3.18568	P	2.70174	P	2.48597	P	4.28378	P	-1.07375	1.35527	1.40071
RPN4	orf19.1069	Transcription factor activity	1.26963	P	1.53041	P	1.59203	P	3.07939	P	3.9837	P	3.30492	P	2.41571	2.63516	2.20832	1.41678	P	1.44361	P	1.72985	P	4.03508	P	4.18411	P	3.71894	P	2.82904	2.80275	2.02258	2.3047	P	2.06308	P	3.28454	P	3.08929	P	3.03758	P	3.90743	P	1.49492	1.40142	1.11564
SAP190	orf19.5160	Protein phosphatase regulator activity	1.05372	P	1.47942	P	1.28841	P	1.00458	P	1.08833	P	1.44131	P	1.03444	-1.39232	1.11447	1.43877	P	1.67731	P	1.47104	P	2.62922	P	2.72786	P	3.62725	P	2.04482	1.6553	2.44879	1.60072	P	1.87983	P	0.993029	A	1.98842	P	1.90381	P	1.82905	M	1.31468	1.00222	1.36169
SLA2	orf19.7201	Structural constituent of cytoskeleton	1.59814	P	1.19595	P	0.853739	P	0.989313	P	0.794953	P	0.73393	P	-1.6154	-1.50442	-1.16324	0.810875	P	0.704484	P	0.500298	P	1.60702	P	1.54649	P	2.06362	P	1.98183	2.1952	4.12478	2.04703	P	2.24217	P	1.3346	P	2.78958	P	2.54609	P	1.55946	P	1.36274	1.13555	1.16848
SNF31	orf19.7094	Glucose transporter activity	0.254649	P	0.0995086	A	0.166804	A	0.242748	P	1.43113	P	0.532141	P	-1.04902	14.3819	3.19022	0.120095	A	0.0855978	P	0.118209	P	0.224245	P	0.149707	P	0.402695	P	1.86724	1.74896	3.40663	0.395706	P	0.0902394	P	0.173638	A	0.133205	P	0.0791583	A	0.112162	A	-2.97066	-1.13999	-1.54809
SNZ1	orf19.2947	--	2.61364	P	2.53071	P	1.93919	P	3.86641	P	5.37119	P	3.74231	P	1.47932	2.1224	1.92983	1.02506	P	1.38519	P	2.06269	P	2.31217	P	1.15739	P	1.59543	P	2.25564	-1.19682	-1.29287	2.14928	P	2.06814	P	2.02788	P	1.47683	P	2.68136	P	2.04189	P	-1.45533	1.29651	1.00691
SOD21.5f	orf19.7111	Manganese superoxide dismutase activity	3.93853	P	1.98587	P	2.67297	P	3.73969	P	5.36172	P	1.34656	P	-1.05317	2.69993	-1.98503	0.93948	P	0.548913	P	0.717612	A	1.90542	P	1.24158	P	1.15906	P	2.02816	2.26189	1.61516	1.18303	P	1.22099	P	1.80355	P	3.79826	P	2.63828	P	4.71081	P	3.21063	2.16076	2.61197
SOD22.3f	orf19.7111	Manganese superoxide dismutase activity	4.91477	P	1.55528	P	2.18694	P	4.69809	P	7.06046	P	0.444941	P	-1.04784	4.80602	-4.95697	0.502128	P	0.525306	P	0.583284	P	2.83792	P	1.43137	P	1.85348	P	5.92981	2.62752	3.06445	2.02198	P	1.80433	P	3.83967	P	5.82481	P	4.00852	P	6.43378	P	2.88435	2.31062	1.67197
SOU3	orf19.732	2,4-dienoyl-CoA reductase (NADPH) activity	0.707645	P	0.847973	P	1.24733	P	1.30038	P	2.09306	P	1.85383	P	1.89137	2.50908	1.49015	0.718676	P	0.460938	P	0.826866	P	1.58748	P	1.01537	P	1.68189	P	2.20889	2.20284	2.03405	1.24233	P	0.805249	P	0.840938	P	0.853765	P	0.747495	P	0.587162	P	-1.47973	-1.10942	-1.38987
STL2.5f	orf19.7093	Glucose transporter activity	0.359504	P	0.341523	P	0.341002	P	0.519847	P	0.643533	P	0.318055	P	1.44601	1.8843	-1.07215	0.232624	P	0.162024	P	0.147463	P	0.345027	P	0.322474	P	0.322979	P	1.48319	1.99028	2.19024	0.137014	P	0.145488	P	0.430925	M	0.107143	P	0.136273	P	0.177027	A	-1.2788	-1.06763	-2.43423
TAF19	orf19.5174	General RNA polymerase II transcription factor activity	0.360021	P	0.242015	P	0.178307	M	0.374046	P	0.271293	P	0.205143	P	1.03896	1.12098	1.1505	0.333333	P	0.373641	P	0.305075	P	0.668739	P	0.666179	P	0.630239	P	2.00622	1.78294	2.06585	1.05317	P	0.871087	P	1.51331	P	0.852317	P	0.869739	P	1.03649	P	-1.23566	-1.00155	-1.46004
TEF41	orf19.2652	Translation elongation factor activity	0.712293	P	0.519042	P	0.204601	P	2.41908	P	2.00315	P	2.77809	P	3.39619	3.85933	13.578	0.238298	P	0.233016	P	0.187463	P	1.18028	P	1.22182	P	1.31662	P	4.95298	5.24348	7.02335	0.829243	P	1.12155	P	0.727503	P	0.722973	P	0.762525	P	0.418919	P	-1.14699	-1.47083	-1.73662
TERT2	orf19.5089	Telomeric template RNA reverse transcriptase activity	0.0919422	M	0.0866093	P	0.100247	A	0.184733	P	0.216614	M	0.139184	A	2.00923	2.50105	1.38842	0.0104019	A	0.0329484	A	0.038806	A	0.0839254	P	0.0889458	P	0.0651198	P	8.06828	2.69955	1.67809	0.0541922	A	0.0359116	A	0.178707	A	0.034749	P	0.0170341	A	0.0554054	A	-1.55953	-2.10822	-3.22545
TES12	orf19.4122	--	0.142562	P	0.195332	P	0.319638	P	0.348855	P	0.284963	P	0.542202	P	2.44704	1.45887	1.6963	0.499764	P	0.341372	P	0.440597	P	0.17762	M	0.166179	P	0.221557	P	-2.81367	-2.05425	-1.98864	0.306748	P	0.252302	P	0.514575	P	0.369691	P	0.231463	P	0.37027	P	1.20519	-1.09003	-1.38973
TIM9	orf19.6696	Protein transporter activity	0.355888	P	0.232801	P	0.276089	P	0.269466	P	0.308097	P	0.441588	P	-1.32072	1.32343	1.59944	1.82506	P	3.84443	P	1.92537	P	5.53996	P	7.08675	P	5.8866	P	3.0355	1.84338	3.05738	1.18609	P	1.60589	P	0.471483	P	1.43533	P	1.17435	P	0.97973	P	1.21013	-1.36748	2.07798
TOM72	orf19.3700	Protein transporter activity	4.53409	P	4.88329	P	4.73624	P	4.68702	P	3.25237	P	4.9156	P	1.03373	-1.50146	1.03787	1.60426	P	3.09647	P	1.8591	P	2.99467	P	5.22804	P	3.37238	P	1.86671	1.68839	1.81398	1.51125	P	1.78729	P	0.577947	P	1.98552	P	1.46393	P	1.78919	P	1.31383	-1.22089	3.09577
TRP4	orf19.3099	Anthranilate phosphoribosyltransferase activity	0.855888	P	1.2629	P	1.38373	P	1.28397	P	1.45426	P	1.72778	P	1.50016	1.15152	1.24864	1.02128	P	0.730978	P	0.696716	P	1.23757	P	0.90959	P	1.51085	P	1.21178	1.24435	2.16853	0.748466	P	0.691529	P	0.56654	P	1.12838	P	1.19339	P	1.07703	P	1.50759	1.72572	1.90106
UFD1	orf19.5833	--	2.90341	P	2.61486	P	2.82744	P	1.92977	P	2.64984	P	2.63779	P	-1.50454	1.01338	-1.0719	2.06005	P	1.88757	P	2.47045	P	3.17274	P	2.73755	P	4.82073	P	1.54013	1.45031	1.95136	4.73211	P	4.74678	P	12.9835	P	4.30888	P	4.87475	P	6.13243	P	-1.09822	1.02696	-2.11719
UGA2	orf19.345	Succinate-semialdehyde dehydrogenase activity	0.421488	P	0.355037	P	0.263353	A	0.771756	P	0.987382	P	1.01258	P	1.82429	2.87296	16.0376	2.46596	P	2.15065	P	2.80925	P	2.99223	P	2.18137	P	2.26216	P	1.21897	1.0149	-1.14546	0.330777	P	0.249079	P	0.240177	A	0.750965	P	0.645291	P	0.538514	P	2.359	2.46144	3.40373
UGT51	orf19.2616	Sterol 3-beta-glucosyltransferase activity	0.190083	A	0.212531	A	0.165982	A	0.203053	A	0.376446	A	0.0374511	A	1.06824	1.77125	-4.43196	0.0723404	A	0.0611413	A	0.0895522	A	0.241119	P	0.111274	P	0.423653	P	3.33312	1.81994	4.73079	0.305726	P	0.395028	P	0.0583016	A	0.377413	P	0.426854	P	0.333784	M	1.23448	1.08057	5.72512
YAR1	orf19.7160	--	0.382231	P	0.376536	P	0.188168	P	0.245802	P	0.195584	P	0.419788	P	-1.55504	-1.92519	2.23092	0.586288	P	0.710938	P	0.471642	P	0.94627	P	1.22291	P	1.17216	P	1.614	1.72014	2.48527	1.01125	P	1.61234	P	1.54753	P	1.60521	P	1.56613	P	1.74459	P	1.58736	-1.0295	1.12734
YOX1	orf19.7017	--	0.255682	P	0.288084	P	0.493837	P	0.371756	P	0.426919	P	0.840134	P	1.45398	1.48193	1.70124	0.280851	P	0.289742	P	0.509254	P	0.352575	P	0.349195	P	0.461078	P	1.25538	1.20519	-1.10449	0.371166	P	0.242173	P	0.247148	A	0.495174	P	0.453908	P	0.477027	P	1.3341	1.87431	1.93012

## Sheet: 298 Down
Microarray Probe Name	orf19 Name	GO Annotation (Molecular Function)	F1-1	Flags	F1-2	Flags	F1-3	Flags	F5-1	Flags	F5-2	Flags	F5-3	Flags	F5-1 vs. F1-1	F5-2 vs. F1-2	F5-3 vs. F1-3	G1-1	Flags	G1-2	Flags	G1-3	Flags	G5-1	Flags	G5-2	Flags	G5-3	Flags	G5-1 vs. G1-1	G5-2 vs. G1-2	G5-3 vs. G1-3	5833-1	Flags	5833-2	Flags	5833-3	Flags	6692-1	Flags	6692-2	Flags	6692-3	Flags	6692-1 vs. 5833-1	6692-2 vs. 5833-2	6692-3 vs. 5833-3
AAT1	orf19.3554	Aspartate transaminase activity	24.3678	P	18.1235	P	17.7732	P	18.726	P	19.0715	P	17.3617	P	-1.30128	1.05231	-1.02371	23.3612	P	17.5272	P	15.3206	P	15.115	P	14.4462	P	14.2167	P	-1.54557	-1.21327	-1.07765	17.8517	P	15.1225	P	14.5146	P	8.60811	P	9.71142	P	8.15135	P	-2.07383	-1.55718	-1.78063
AAT21	orf19.6287	Aspartate transaminase activity	11.7655	P	11.6634	P	11.7634	P	8.64504	P	12.5973	P	9.65344	P	-1.36095	1.08007	-1.21857	16.7258	P	14.3923	P	15.3887	P	8.58526	P	8.94253	P	7.88847	P	-1.9482	-1.60942	-1.95078	7.38446	P	5.15378	P	5.564	P	5.24035	P	5.33768	P	5.87838	P	-1.40915	1.03568	1.0565
ADE1	orf19.7484	Phosphoribosylaminoimidazolesuccinocarboxamide synthase activity	4.58316	P	3.34029	P	3.89647	P	2.75878	P	1.85699	P	2.53885	P	-1.6613	-1.79877	-1.53474	7.51584	P	5.13417	P	5.70806	P	5.96448	P	4.13836	P	5.09094	P	-1.2601	-1.24063	-1.12122	6.76789	P	6.30847	P	14.4981	P	3.16506	P	3.28657	P	3.04865	P	-2.13832	-1.91947	-4.75558
ADE13	orf19.3870	Adenylosuccinate lyase activity	27.8497	P	21.2531	P	31.2046	P	16.5565	P	12.8675	P	17.7915	P	-1.6821	-1.65169	-1.7539	31.0142	P	23.3505	P	25.5516	P	22.9325	P	20.134	P	23.4345	P	-1.35241	-1.15976	-1.09034	16.2004	P	14.1041	P	16.3916	P	7.44498	P	7.45291	P	9.18514	P	-2.17602	-1.89242	-1.78458
ADE2	orf19.5906	Phosphoribosylaminoimidazole carboxylase activity	8.05062	P	6.79208	P	9.74158	P	6.13588	P	5.2061	P	4.41308	P	-1.31136	-1.30284	-2.19726	6.19858	P	5.30673	P	6.62328	P	5.50044	P	4.25787	P	4.79042	P	-1.1167	-1.25129	-1.39077	6.10174	P	5.0198	P	7.56337	P	2.86293	P	2.95641	P	3.32635	P	-2.13105	-1.67322	-2.29013
ADE6	orf19.6317	Phosphoribosylformylglycinamidine synthase activity	16.4576	P	15.0731	P	15.7814	P	10.7878	P	9.33649	P	10.4902	P	-1.52558	-1.61443	-1.50439	17.0331	P	14.3594	P	11.8155	P	9.37345	P	12.1475	P	12.7957	P	-1.81716	-1.18208	1.08295	7.56135	P	7.84807	P	5.24461	P	4.81178	P	4.59419	P	3.87027	P	-1.57143	-1.70826	-1.3551
ADE8	orf19.5789	Phosphoribosylglycinamide formyltransferase activity	1.40108	P	1.20762	P	1.6327	P	0.612214	P	0.703996	P	1.07658	P	-2.22142	-1.82718	-1.5249	2.15508	P	2.05724	P	2.3009	P	1.9536	P	1.36127	P	1.45734	P	-1.05238	-1.56199	-1.65321	5.92434	P	5.2035	P	15.3308	P	2.65251	P	2.89379	P	5.00541	P	-2.23348	-1.79816	-3.06285
AGP2	orf19.4679	Hydrogen:amino acid symporter activity	8.52428	P	8.88759	P	9.20214	P	3.40153	P	4.53628	P	4.10173	P	-2.50601	-1.95923	-2.24348	4.87825	P	3.83288	P	4.22239	P	0.712034	P	0.643119	P	0.553331	P	-6.87745	-5.98156	-7.62416	0.962168	P	0.735727	P	0.190114	A	0.875483	P	1.15832	P	0.878378	P	-1.09901	1.57438	4.62027
AKR1	orf19.4950	--	3.27479	P	2.76167	P	4.20707	P	2.76183	P	2.23344	P	1.72107	P	-1.18573	-1.23651	-2.44444	4.31915	P	4.107	P	1.90985	P	2.34814	P	4.27562	P	2.83121	P	-1.8394	1.04106	1.48243	2.2362	P	2.59116	P	0.927757	P	1.53764	P	1.56413	P	0.577027	P	-1.4543	-1.65662	-1.60782
ALP1	orf19.2337	Basic amino acid transporter activity	13.2541	P	14.1818	P	14.0214	P	4.70611	P	6.28601	P	7.38625	P	-2.81637	-2.25609	-1.89831	8.45839	P	6.02666	P	7.89642	P	2.58992	P	3.82339	P	4.91037	P	-3.26729	-1.58146	-1.60383	2.03374	P	1.90424	P	2.49683	P	2.06274	P	1.74749	P	2.46486	P	1.01426	-1.08969	-1.01297
ALS1.3eoc	orf19.5741	Cell adhesion molecule binding	20.1741	P	14.3016	P	12.4832	P	10.5214	P	13.8486	P	5.25936	P	-1.91744	-1.03271	-2.37351	18.5636	P	17.1505	P	18.7248	P	8.01376	P	8.21889	P	6.06325	P	-2.31646	-2.08672	-3.08824	11.6145	P	7.6372	P	13.3676	P	14.3494	P	12.1363	P	13.9203	P	1.23547	1.5891	1.04135
ALS6	orf19.7414	Cell adhesion molecule binding	0.66374	P	0.541769	P	0.683648	P	0.671756	P	1.20925	P	0.86417	P	1.01208	2.23205	1.26406	0.288889	P	0.318274	P	0.267463	P	0.0461812	A	0.0442899	A	0.138847	A	-6.25556	-7.18616	-1.92631	0.921268	P	0.896869	P	0.875792	P	0.874517	P	0.753507	P	1.07162	P	-1.05346	-1.19026	1.2236
AOX1	orf19.4774	Alternative oxidase activity	0.360537	P	0.567568	P	0.818406	P	0.407634	P	0.303891	P	0.344885	P	1.13063	-1.86767	-2.37298	0.186761	P	0.190557	P	0.204776	P	0.113233	P	0.146047	P	0.242889	P	-1.64936	-1.30477	1.18612	0.472393	P	0.563536	P	1.25729	P	0.290541	P	0.260521	P	0.57027	A	-1.62591	-2.16311	-2.20472
AOX2	orf19.4773	Alternative oxidase activity	0.338585	P	0.537469	P	0.293755	A	0.48855	P	0.833333	P	0.468418	P	1.43406	1.6126	1.68473	0.923641	P	1.99219	P	1.6997	P	0.288854	P	0.314605	P	0.325599	P	-3.20427	-6.29507	-4.90325	2.63241	P	3.64779	P	1.88086	P	1.29826	P	2.35822	P	2.43581	P	-2.02752	-1.55069	1.27744
AQY1	orf19.2849	Water channel activity	3.66271	P	1.61701	P	1.47946	P	1.13855	P	1.81703	P	0.707378	P	-3.2123	1.14958	-2.15738	5.2565	P	2.25934	P	2.69701	P	0.760879	P	0.691618	P	0.906998	P	-6.61071	-3.27336	-2.94694	1.14622	P	0.790055	P	0.987959	P	0.360521	P	0.357715	P	0.493243	P	-3.20984	-2.32263	-2.02918
ARO3.exon2	orf19.1517	3-deoxy-7-phosphoheptulonate synthase activity	15.999	P	15.5012	P	21.1257	P	11.7992	P	18.6162	P	15.1532	P	-1.35593	1.20095	-1.39415	12.1026	P	10.3319	P	12.0161	P	7.82948	P	6.91984	P	6.93076	P	-1.54577	-1.49308	-1.73374	6.94785	P	4.82781	P	10.4461	P	6.68726	P	9.03407	P	19.1784	P	-1.03897	1.87126	1.83593
ARR3	orf19.3122	Arsenite transporter activity	6.43182	P	5.55897	P	4.13887	P	3.02901	P	3.62881	P	2.76356	P	-2.12341	-1.5319	-1.49766	6.78463	P	4.87636	P	3.97761	P	1.53885	P	2.40593	P	1.88398	P	-4.50715	-2.03121	-2.13523	1.8681	P	1.77256	P	2.0076	P	1.20946	P	1.22745	P	1.05	P	-1.54457	-1.44409	-1.912
AUR1	orf19.1945	Inositol phosphoceramide synthase activity	5.74225	P	7.60012	P	6.07929	P	4.23588	P	7.1714	P	6.14701	P	-1.40471	-1.07524	-1.00538	9.97896	P	7.94616	P	8.83134	P	3.41341	P	5.21944	P	3.42833	P	-2.96085	-1.51294	-2.25194	3.75102	P	3.19429	P	2.40304	P	2.97973	P	3.20691	P	3.55068	P	-1.29481	-1.02855	1.52578
AXL2	orf19.5292	--	0.752066	P	0.81941	P	0.461791	P	0.868702	P	0.515247	P	1.54891	P	1.15509	-1.59032	3.35413	2.12861	P	2.40965	P	1.60478	P	0.949822	P	1.39348	P	1.03181	P	-2.24106	-1.72922	-1.5553	0.44683	P	0.427256	P	1.03295	P	0.71332	P	0.491984	P	0.377027	P	1.5964	1.1515	-2.73973
AYR2	orf19.5615	Acylglycerone-phosphate reductase activity	4.99897	P	3.69533	P	2.79293	P	2.7458	P	3.4469	P	1.61878	P	-1.82059	-1.07207	-1.72533	2.97778	P	2.28227	P	2.42269	P	0.964032	P	1.49488	P	1.15157	P	-3.08888	-1.52673	-2.10381	1.21881	P	1.38674	P	1.3967	P	0.939189	P	1.14529	P	0.90946	P	-1.29773	-1.21082	-1.53575
CAN1	orf19.97	L-arginine transporter activity	2.48683	P	2.11517	P	1.93303	P	1.43282	P	1.92114	P	1.31694	P	-1.72289	-1.09833	-1.46546	2.47612	P	1.53346	P	1.93373	P	0.754219	P	0.800695	P	0.700412	P	-2.84754	-1.85104	-2.70865	2.39417	P	1.84761	P	1.16857	P	1.30598	P	0.874248	P	1.02703	P	-1.76629	-2.12959	1.1214
CAN2	orf19.111	Basic amino acid transporter activity	10.4434	P	4.33661	P	9.59162	P	6.30725	P	4.39537	P	1.96031	P	-1.64371	1.03892	-3.95933	7.07447	P	4.58084	P	7.08686	P	1.37234	P	1.65026	P	1.42852	P	-4.88945	-2.75537	-4.90608	4.10838	P	2.1105	P	4.37389	P	1.12162	P	0.695391	P	0.697297	P	-3.6629	-3.03498	-6.27263
CAP1	orf19.1623	Transcription factor activity	1.203	P	1.63145	P	1.49055	P	1.49313	P	1.77603	P	1.44606	P	1.24118	1.08862	-1.03077	2.56596	P	2.28668	P	2.18687	P	1.36856	P	1.41728	P	1.19349	P	-1.87493	-1.61344	-1.83233	2.02352	P	1.95856	P	1.78454	P	1.68147	P	2.27655	P	1.59865	P	-1.20342	1.16236	-1.11628
CAT2	orf19.4591	Carnitine O-acetyltransferase activity	3.1374	P	4.2672	P	4.6894	P	2.98855	P	4.2734	P	3.73728	P	-1.04981	1.00145	-1.25476	2.79764	P	3.78974	P	3.53731	P	3.01421	P	2.74451	P	2.27807	P	1.07741	-1.38085	-1.55277	2.54703	P	2.47422	P	2.90748	P	1.54151	P	1.30962	P	1.15541	P	-1.6523	-1.88926	-2.51641
CFL1	orf19.1263	Ferric-chelate reductase activity	0.127066	P	0.191032	P	0.186524	P	0.0870229	P	0.12408	P	0.0955841	P	-1.46015	-1.53959	-1.95141	0.16974	P	0.0866168	P	0.136716	P	0.117673	P	0.091142	P	0.0890718	P	-1.44247	1.05224	-1.5349	0.169734	P	0.186004	P	0.200254	M	0.0994208	P	0.0761523	P	0.0851351	A	-1.70723	-2.44252	-2.35218
CPA1	orf19.4630	Carbamoyl-phosphate synthase activity	0.521694	P	0.560196	P	0.537387	P	0.296183	P	0.283912	P	0.278927	P	-1.76139	-1.97314	-1.92662	0.270922	A	0.207201	A	0.322985	P	0.113677	P	0.160322	A	0.194237	A	-2.38327	-1.29241	-1.66284	0.261759	P	0.242173	P	0.375158	P	0.19112	P	0.214429	P	0.3	P	-1.36961	-1.12939	-1.25053
CPA2	orf19.3221	Carbamoyl-phosphate synthase activity	1.24329	P	1.57678	P	1.25637	P	0.884733	P	0.950578	P	1.72946	P	-1.40527	-1.65876	1.37655	0.605201	P	0.544837	P	0.486567	P	0.272647	P	0.226208	P	0.320359	P	-2.21973	-2.40857	-1.51882	0.257669	P	0.280847	P	0.468948	P	0.28861	P	0.273547	P	0.377027	P	1.12008	-1.02669	-1.2438
CTA1	orf19.6229	Catalase activity	6.86105	P	7.03931	P	8.69351	P	3.67405	P	11.2492	P	4.95193	P	-1.86744	1.59806	-1.75558	3.82695	P	3.66848	P	6.27104	P	2.34458	P	1.80344	P	2.49289	P	-1.63225	-2.03416	-2.51557	2.97239	P	1.56998	P	2.50824	P	1.31467	P	1.2485	P	2.17973	P	-2.26094	-1.2575	-1.15071
CTA211.5f	orf19.362	--	0.515496	P	0.318182	P	0.784717	M	0.280916	P	0.192429	M	0.444941	P	-1.83505	-1.6535	-1.76364	0.813712	P	0.720109	P	0.675821	P	0.368117	P	0.559297	P	1.19274	P	-2.21047	-1.28752	1.76488	0.095092	P	0.122468	P	0.0126743	A	0.0801158	P	0.130261	P	0.224324	A	-1.18693	1.06363	17.6992
CYB3	orf19.5000	L-lactate dehydrogenase activity	0.276343	P	0.267199	P	0.138044	A	0.380916	P	0.774974	P	0.341532	P	1.37842	2.90036	2.47407	0.249173	M	0.273438	P	0.205373	A	0.290409	P	0.281113	P	0.194611	P	1.16549	1.02807	-1.0553	0.347648	P	0.316759	P	0.419518	M	0.144788	P	0.169339	P	0.245946	M	-2.40109	-1.87056	-1.70573
CYT2	orf19.4578	Holocytochrome-c synthase activity	0.599174	P	0.386978	P	0.642564	P	0.61145	P	0.491062	P	0.504192	P	1.02049	1.26897	-1.27444	0.732388	P	0.658967	P	0.872836	P	0.304174	P	0.311493	P	0.356662	P	-2.40779	-2.11551	-2.44724	1.2362	P	1.10589	P	2.66793	P	1.20656	P	1.12425	P	2.22162	P	-1.02456	1.0166	-1.2009
DAK2.3eoc	orf19.4777	Glycerone kinase activity	15.9075	P	9.39005	P	11.4552	P	10.8855	P	6.02839	P	4.17496	P	-1.46135	-1.55764	-2.74379	15.3239	P	10.5112	P	5.01134	P	7.8881	P	11.6061	P	8.69648	P	-1.94266	1.10417	1.73536	1.15542	P	2.7302	P	1.34221	P	2.76448	P	2.91082	P	0.789189	P	2.39262	1.06616	-1.70074
DBP2.exon1	orf19.171	RNA helicase activity	4.88998	P	11.9361	P	11.5062	P	4.97481	P	8.25342	P	13.1096	P	1.01735	-1.4462	1.13935	8.8435	P	10.0221	P	11.9869	P	5.95249	P	5.5355	P	3.67739	P	-1.48568	-1.81051	-3.25961	4.39366	P	3.72652	P	4.44106	P	4.34652	P	4.67134	P	3.90811	P	-1.01084	1.25354	-1.13637
DOG2	orf19.3392	2-deoxyglucose-6-phosphatase activity	10.405	P	8.90541	P	9.60559	P	9.52519	P	8.65825	P	9.65959	P	-1.09236	-1.02855	1.00562	4.26383	P	3.12466	P	3.42687	P	2.20027	P	2.05893	P	1.66729	P	-1.93787	-1.51761	-2.05535	2.73722	P	2.47882	P	3.28897	P	3.8668	P	3.46092	P	5.12027	P	1.41267	1.3962	1.5568
DPP1	orf19.656	Phosphatidase phosphatase activity	2.36519	P	1.59337	P	0.727198	P	1.70153	P	2.02313	P	1.25545	P	-1.39004	1.26972	1.72642	6.37163	P	4.34919	P	3.47343	P	2.81217	P	2.66874	P	1.95846	P	-2.26574	-1.62968	-1.77356	1.17076	P	0.801105	P	0.73384	P	0.968147	P	0.8998	P	0.735135	P	-1.20928	1.1232	1.00176
DRS21	orf19.783	Calcium-transporting ATPase activity	3.77273	P	5.24693	P	5.33936	P	3.35038	P	4.29548	P	3.99273	P	-1.12606	-1.2215	-1.33727	5.113	P	4.87636	P	4.43761	P	3.2167	P	4.03953	P	3.98391	P	-1.58952	-1.20716	-1.11388	3.49693	P	2.99632	P	2.90494	P	1.95946	P	2.04008	P	1.77703	P	-1.78464	-1.46873	-1.63472
DUR32	orf19.5017	Urea transporter activity	0.0635331	A	0.0491401	M	0.0887428	A	0.125954	A	0.0630915	A	0.0933482	A	1.9825	1.28391	1.0519	0.478014	P	0.321671	P	0.299104	P	0.113233	P	0.195095	P	0.13997	P	-4.22152	-1.64879	-2.13692	0.126789	P	0.108656	P	0.219265	A	0.0916988	P	0.0591182	P	0.116216	P	-1.38267	-1.83794	-1.8867
DUR33	orf19.7205	Urea transporter activity	1.08316	P	1.3016	P	1.17173	P	0.684733	P	1.42376	P	1.17775	P	-1.58187	1.09386	1.00514	1.8539	P	1.55571	P	1.64299	P	0.819272	P	0.876281	P	0.86265	P	-2.26286	-1.77535	-1.90458	0.480573	P	0.544199	P	1.01901	P	0.617761	P	0.476954	P	0.460811	P	1.28547	-1.14099	-2.21134
EBP1	orf19.125	NADPH dehydrogenase activity	2.578	P	1.05467	P	0.548891	A	0.464886	P	0.251314	P	0.188373	A	-5.54544	-4.19661	-2.91384	3.87234	P	2.95618	P	2.31343	P	0.856128	P	1.06918	P	0.867889	P	-4.52309	-2.76491	-2.66559	2.44888	P	2.30387	P	3.97085	P	0.848456	P	0.813627	P	1.01757	P	-2.88627	-2.8316	-3.9023
ECM17	orf19.4099	Sulfite reductase (NADPH) activity	3.58006	P	3.69963	P	3.84634	P	3.79237	P	3.5184	P	2.90553	P	1.0593	-1.05151	-1.3238	6.33333	P	6.81284	P	7.21433	P	4.01377	P	3.99341	P	3.4506	P	-1.5779	-1.70602	-2.09075	4.10941	P	3.37017	P	4.06464	P	3.33591	P	3.03908	P	5.82973	P	-1.23187	-1.10894	1.43426
ECM22	orf19.2623	Transcription factor activity	4.04313	P	3.8148	P	3.11298	P	2.00763	P	2.92219	P	1.42901	P	-2.05094	-1.31238	-2.21772	3.13026	P	2.74066	P	2.99343	P	1.13766	P	1.21486	P	1.21201	P	-2.82028	-2.2552	-2.46634	1.83845	P	1.27164	P	1.30355	P	0.976351	P	0.890281	P	0.926351	P	-1.78107	-1.45684	-1.31981
ECM42	orf19.6500	Amino-acid N-acetyltransferase activity	12.079	P	6.32002	P	10.0493	P	5.37023	P	3.54784	P	5.60481	P	-2.24926	-1.78137	-1.79298	0.975414	P	0.992527	P	0.897313	P	1.17762	P	1.35615	P	1.55689	P	1.2073	1.36636	1.73505	0.215746	A	0.241252	P	0.190114	A	0.239382	P	0.273547	P	0.181081	A	1.10955	1.13386	-1.04988
ENA22	orf19.6070	ATPase activity	6.11984	P	8.30528	P	6.40016	P	3.53282	P	5.79495	P	3.00894	P	-1.73228	-1.43319	-2.12705	11.3858	P	7.79212	P	9.90865	P	3.97957	P	5.19253	P	5.66579	P	-2.86106	-1.50064	-1.74886	3.12883	P	2.54236	P	2.12421	P	2.03861	P	1.83768	P	2.09054	P	-1.53479	-1.38346	-1.0161
FAA21	orf19.272	Long-chain-fatty-acid-CoA ligase activity	0.693182	P	0.753686	P	0.753492	P	1.10458	P	0.820189	P	1.15931	P	1.59349	1.08824	1.53858	1.37825	P	1.22826	P	0.921791	P	0.456039	P	0.511713	P	0.522829	P	-3.02222	-2.40029	-1.76308	0.836401	P	0.622468	P	0.489227	A	0.6139	P	0.589178	P	0.764865	P	-1.36244	-1.0565	1.56342
FCR1	orf19.6817	Transcription factor activity	7.62397	P	8.84951	P	8.48891	P	3.71985	P	5.98633	P	4.15428	P	-2.04954	-1.47829	-2.04341	6.9357	P	5.40319	P	6.9991	P	3.02309	P	3.36914	P	3.25487	P	-2.06188	-1.57505	-2.32443	2.31493	P	2.47422	P	3.81496	P	2.32336	P	2.69639	P	4.28919	P	1.00364	1.0898	1.12431
FDH12	orf19.638	Formate dehydrogenase activity	0.819731	P	0.907862	P	1.06204	P	0.480916	P	1.63407	P	0.466182	P	-1.6971	1.79846	-2.22275	0.857683	P	1.28719	P	2.11224	P	0.35746	P	0.404283	P	0.790606	P	-2.40467	-3.02893	-2.43659	1.55215	P	1.63168	P	1.62231	P	0.648649	P	0.668337	P	0.885135	A	-2.39289	-2.4414	-1.83283
FDH13.5f	orf19.1774	Formate dehydrogenase activity	0.148244	A	0.195332	A	0.373048	P	0.200763	M	0.0157729	A	0.0732253	A	1.35428	-12.384	-5.09453	0.135697	A	0.255095	A	0.192836	A	0.0515098	A	0.0549048	A	0.0913174	A	-2.6344	-4.64613	-2.11171	0.316973	P	0.415285	P	0.849176	P	0.138996	P	0.0941884	A	0.304054	A	-2.28045	-4.40909	-2.79285
FDH2	orf19.1117	Formate dehydrogenase activity	0.152376	P	0.306511	P	0.294166	P	0.183969	P	0.0746583	P	0.0245947	A	1.20734	-4.10552	-11.9605	0.0548463	P	0.210938	P	0.109254	P	0.0235346	A	0.0281845	P	0.0235778	A	-2.33045	-7.48417	-4.63375	0.0858896	P	0.0699816	P	0.328264	P	0.034749	A	0.0480962	P	0.164865	A	-2.47171	-1.45503	-1.99111
FDH4.3f	orf19.1774	Formate dehydrogenase activity	1.38688	P	1.0215	P	2.33443	P	0.748092	P	0.93796	P	1.06093	P	-1.85389	-1.08906	-2.20037	0.735697	P	1.49592	P	1.88418	P	0.296625	P	0.317716	P	0.398578	P	-2.48023	-4.70837	-4.72726	2.19427	P	2.72468	P	7.97845	P	0.705598	P	0.761523	P	1.85135	P	-3.10981	-3.57793	-4.30953
FET33	orf19.4211	Ferroxidase activity	1.22701	A	0.771806	P	1.32169	A	1.7458	P	1.20084	A	1.8161	A	1.54812	1.35449	1.14475	15.1955	P	16.7593	P	21.3152	P	8.15853	P	9.84572	P	7.85348	P	-1.8094	-1.73577	-2.84867	18.6442	P	14.1473	P	41.0063	P	10.9073	P	9.63427	P	17.8284	P	-1.70932	-1.46844	-2.30006
FOX2	orf19.1288	3-hydroxyacyl-CoA dehydrogenase activity	3.22831	P	2.60442	P	2.8258	P	2.6687	P	9.88854	P	1.91895	P	-1.20969	3.79683	-1.47258	3.55934	P	2.79688	P	2.88119	P	1.81572	P	1.43594	P	1.60591	P	-1.96029	-1.94776	-1.79412	1.07055	P	0.533149	P	0.569075	P	0.555984	P	0.391784	P	0.414865	M	-1.92551	-1.36083	-1.37171
FTR1	orf19.7219	Ferrous iron transporter activity	1.39669	P	1.32862	P	0.986853	P	0.328244	P	0.437434	P	0.357183	P	-4.25505	-3.03731	-2.76288	1.59645	P	2.26053	P	2.84776	P	0.430284	P	0.769583	P	0.576909	P	-3.76853	-3.1572	-5.16622	1.97648	P	1.42035	P	2.88213	P	0.343629	P	0.396794	P	0.374324	A	-5.60413	-3.85284	-5.36714
GAD1	orf19.1153	Glutamate decarboxylase activity	19.0119	P	15.1751	P	16.3813	P	13.6053	P	11.8644	P	9.71604	P	-1.39738	-1.27905	-1.686	18.913	P	12.3207	P	10.7522	P	8.38721	P	9.90556	P	10.5868	P	-2.25498	-1.24381	-1.01562	5.11247	P	4.76796	P	8.20913	P	3.25483	P	3.23046	P	3.13243	P	-1.57074	-1.47594	-2.62069
GAG	orf19.2668	--	0.72624	P	0.928133	P	1.17338	P	0.422901	P	0.506835	P	0.673561	P	-1.71728	-1.83123	-1.74205	0.0359338	A	0.0404212	A	0.0232836	A	0.01	A	0.0270864	A	0.0467814	A	-3.59338	-1.49231	2.0092	0.0255624	A	0.019337	A	0.0760456	A	0.027027	A	0.01	A	0.0378378	A	1.0573	-1.9337	-2.00978
GAL10	orf19.1153	UDP-glucose 4-epimerase activity	1.28926	P	1.04638	P	1.05916	P	1.55992	P	2.21872	P	1.53522	P	1.21365	2.11576	1.5765	12.3331	P	11.2582	P	10.1101	P	5.0746	P	6.39385	P	5.91991	P	-2.41453	-1.76575	-1.71338	1.79294	P	1.3186	P	1.4455	P	1.07674	P	1.09719	P	0.768919	P	-1.66564	-1.20396	-1.98512
GAL7	orf19.3675	UTP:galactose-1-phosphate uridylyltransferase activity	1.56043	P	2.06142	P	1.65489	P	1.5229	P	3.61725	P	3.8161	P	-1.02465	1.75473	2.30595	7.21513	P	8.38587	P	7.01731	P	3.26865	P	3.4257	P	3.08271	P	-2.20737	-2.44793	-2.27635	3.1953	P	2.10221	P	2.55767	P	1.89672	P	1.67535	P	1.46622	P	-1.68464	-1.25479	-1.7444
GAP4	orf19.1799	Amino acid permease activity	18.2459	P	16.5338	P	14.8661	P	11.7	P	10.5657	P	9.45836	P	-1.55948	-1.56485	-1.57174	14.9589	P	12.5438	P	10.6836	P	9.66341	P	11.6783	P	8.38323	P	-1.54799	-1.07412	-1.2744	5.70654	P	5.94383	P	0.666667	P	4.65541	P	5.06413	P	3.34459	P	-1.22579	-1.17371	5.01689
GCV1	orf19.5519	Glycine dehydrogenase (decarboxylating) activity	2.81069	P	1.42844	P	1.79951	P	1.45496	P	0.633544	P	0.810229	P	-1.94467	-2.12231	-2.20435	2.67825	P	1.54093	P	1.3391	P	1.62389	P	1.23408	P	1.67758	P	-1.64754	-1.24741	1.23602	2.03579	P	2.85635	P	1.60837	P	0.887066	P	0.926854	P	0.65	P	-2.29497	-3.08177	-2.47441
GCV2	orf19.385	Glycine dehydrogenase (decarboxylating) activity	12.2709	P	13.0365	P	24.4569	P	8.44237	P	8.95741	P	10.078	P	-1.42773	-1.46358	-2.4042	6.44728	P	5.74898	P	9.55313	P	8.3437	P	5.20992	P	8.42141	P	1.29419	-1.10101	-1.13839	6.93149	P	7.11602	P	7.23764	P	2.46622	P	3.91583	P	2.54459	P	-2.81887	-1.83398	-2.5345
GNP1	orf19.7566	Amino acid permease activity	4.26601	P	6.68489	P	13.9113	P	4.29389	P	15.9443	P	8.08105	P	1.00654	2.38512	-1.72147	6.39527	P	4.66508	P	7.50567	P	4.33526	P	3.34041	P	4.36752	P	-1.47518	-1.39656	-1.71852	5.35072	P	2.63996	P	2.96578	P	2.41313	P	1.58818	P	1.67297	P	-2.21734	-1.66226	-1.77276
GPT1	orf19.4063	L-gamma-aminobutyric acid transporter activity	0.102789	A	0.162162	P	0.327034	P	0.194656	P	0.11041	P	0.199553	P	1.89374	-1.46873	-1.63883	0.216548	P	0.15659	P	0.220896	P	0.104796	P	0.101025	P	0.132111	P	-2.06639	-1.55001	-1.67205	0.0736196	P	0.0939226	A	0.276299	A	0.0839768	A	0.0841683	A	0.156757	A	1.14069	-1.11589	-1.7626
GRP4	orf19.3150	Oxidoreductase activity	1.77531	P	1.5	P	0.622021	P	1.28702	P	2.01682	P	1.06764	P	-1.37939	1.34455	1.7164	1.22459	P	0.91678	P	0.999403	P	0.648313	P	0.609078	P	0.44274	P	-1.88888	-1.50519	-2.25732	3.42434	P	2.82781	P	2.24335	P	1.77317	P	1.67535	P	2.06351	P	-1.9312	-1.68789	-1.08715
GSL22	orf19.2495	1,3-beta-glucan synthase activity	1.26446	P	1.72666	P	1.17009	P	0.883206	P	1.88854	P	1.21297	P	-1.43167	1.09375	1.03664	1.76076	P	1.74355	P	1.76358	P	0.87833	P	1.16398	P	0.730913	P	-2.00466	-1.49791	-2.41285	0.595092	P	0.570902	P	0.510773	P	0.551158	P	0.665331	P	0.971622	P	-1.07971	1.1654	1.90226
GSL23.3f	orf19.3269	1,3-beta-glucan synthase activity	3.70093	P	5.50061	P	3.36072	P	3.62977	P	4.90011	P	2.90889	P	-1.0196	-1.12255	-1.15533	5.09078	P	4.63451	P	5.02925	P	2.63055	P	2.94583	P	2.29753	P	-1.93525	-1.57325	-2.18898	1.41718	P	1.30663	P	1.69962	P	1.28378	P	1.2014	P	1.32838	P	-1.10391	-1.08759	-1.27947
GTT1.3	orf19.6947	Glutathione transferase activity	3.04339	P	2.20147	P	2.0304	P	2.01374	P	2.63197	P	2.0967	P	-1.51131	1.19555	1.03265	2.01986	P	1.87126	P	1.8191	P	1.12389	P	1.2511	P	1.09843	P	-1.7972	-1.4957	-1.6561	1.03374	P	0.883978	P	0.776933	P	0.923745	P	0.991984	P	0.606757	P	-1.11908	1.12218	-1.28047
GYP1	orf19.3811	Rab GTPase activator activity	1.52066	P	1.37654	P	1.63435	P	1.66794	P	1.94953	P	1.24818	P	1.09685	1.41626	-1.30938	1.17778	P	0.933424	P	0.896716	P	1.07105	P	0.865666	P	1.08533	P	-1.09965	-1.07827	1.21034	0.47955	P	0.657459	P	0.774398	P	0.294402	P	0.433868	P	0.4	P	-1.6289	-1.51534	-1.93599
HGT11	orf19.4527	Glucose transporter activity	6.50207	P	14.1434	P	17.8829	P	19.7947	P	61.7597	P	29.8726	P	3.14186	4.37331	1.69011	6.44137	P	8.85088	P	13.0436	P	11.7025	P	7.32321	P	8.68806	P	1.80343	-1.23473	-1.48075	18.6166	P	11.5571	P	26.1724	P	8.03137	P	7.54459	P	8.97027	P	-2.30456	-1.53936	-2.99834
HGT12	orf19.3668	Glucose transporter activity	0.815083	P	1.42076	P	1.64092	P	1.80992	P	19.8312	P	7.05338	P	2.36266	13.9534	4.43265	0.846572	P	1.44039	P	2.98567	P	5.71781	P	3.72712	P	5.34038	P	6.75348	2.58866	1.80619	5.47597	P	2.58656	P	1.07414	P	1.75917	P	0.827655	P	0.357432	A	-3.10154	-3.11512	-2.97392
HIP1	orf19.4940	L-histidine transporter activity	5.18905	P	9.6296	P	7.53492	P	3.33969	P	5.96004	P	8.16881	P	-1.55375	-1.61569	1.08413	6.17872	P	6.29925	P	6.17791	P	2.75933	P	3.64971	P	3.55464	P	-2.23922	-1.72596	-1.73798	3.93558	P	3.26151	P	3.43726	P	3.91795	P	3.30962	P	2.18649	P	-1.0045	1.01475	-1.57205
HIS3	orf19.183	Imidazoleglycerol-phosphate dehydratase activity	0.349948	P	0.990786	P	0.794988	P	0.422519	P	0.808097	P	1.37228	P	1.26247	-1.23933	1.74255	2.28605	P	3.08882	P	3.51045	P	1.10879	P	1.06479	P	1.30146	P	-2.02903	-2.95664	-2.87437	2.60532	P	2.62891	P	1.8384	M	2.41892	P	2.41383	P	2.14392	P	-1.07605	-1.06256	1.6895
HNM1	orf19.2003	Choline transporter activity	14.3195	P	21.6754	P	22.175	P	9.93283	P	19.2171	P	19.9603	P	-1.44261	-1.12417	-1.10717	20.4329	P	19.9966	P	27.0537	P	11.669	P	12.3077	P	13.2027	P	-1.71898	-1.63686	-2.07008	12.7316	P	9.49356	P	18.1236	P	8.7751	P	8.76453	P	14.2527	P	-1.44362	-1.08377	-1.16909
HOL1	orf19.2991	Transporter activity	2.87319	P	3.0172	P	2.92523	P	2.33969	P	2.87066	P	1.84684	P	-1.22604	-1.05641	-1.58905	1.11442	P	0.874491	P	1.04	P	0.497114	P	0.502379	P	0.471744	P	-2.15665	-1.73487	-2.24099	0.520961	P	0.452118	P	0.408112	P	0.704633	P	0.681864	P	0.841892	P	1.34627	1.51066	2.09463
HSP12	orf19.3160	--	18.845	P	6.94779	P	6.3143	P	8.5584	P	7.51893	P	2.08273	P	-2.23415	1.0665	-3.02423	1.98582	P	0.696841	P	0.616119	P	0.169183	A	0.155747	A	0.172343	A	-12.3126	-4.42942	-3.51665	3.16769	P	1.50553	P	1.52471	P	0.451737	P	0.88978	P	0.963514	P	-7.01223	-1.69202	-1.58245
HSP31	orf19.3664	--	0.866219	P	1.6769	P	1.0074	P	0.309924	P	0.713985	P	0.399665	P	-2.79494	-2.34865	-2.5206	0.686052	P	0.7714	P	0.949851	P	0.451155	P	0.615666	P	0.587949	P	-1.52066	-1.25295	-1.61553	0.296523	P	0.229282	P	0.674271	P	0.428571	P	0.191383	P	0.217568	A	1.44532	-1.19803	-3.09913
HXT5.3f	orf19.2021	Fructose transporter activity	40.6105	P	37.9533	P	45.8578	P	25.8263	P	30.9574	P	27.6001	P	-1.57383	-1.23176	-1.62079	31.1357	P	21.9136	P	27.5137	P	8.13344	P	8.72548	P	9.02302	P	-3.83104	-2.50694	-3.05415	15.0736	P	12.0898	P	25.5976	P	9.65734	P	10.6528	P	20.0142	P	-1.55809	-1.13486	-1.28303
HXT5.5f	orf19.2021	Fructose transporter activity	43.2495	P	43.9681	P	58.7782	P	26.8256	P	36.9348	P	30.1741	P	-1.6175	-1.19605	-1.95807	24.113	P	20.1464	P	28.5675	P	6.20804	P	6.88873	P	4.91411	P	-3.70515	-2.978	-6.17678	14.0685	P	12.9029	P	26.2326	P	9.83108	P	9.97144	P	17.7223	P	-1.42302	-1.28717	-1.51288
IFC3	orf19.3749	Oligopeptide transporter activity	1.75568	P	1.10565	P	1.00493	P	0.837405	P	0.670873	P	0.332029	P	-2.09658	-1.64808	-3.02663	4.5721	P	2.90999	P	0.877612	P	0.680284	P	2.09151	P	0.909057	P	-6.72087	-1.39133	1.03583	0.295501	P	0.199816	P	0.277567	P	0.246139	P	0.0941884	P	0.164865	A	-1.20055	-2.12145	-1.6836
IFF4	orf19.7472	--	1.05165	P	1.33661	P	1.34675	P	1.26641	P	1.86856	P	0.908329	P	1.20421	1.39798	-1.48267	0.952246	P	0.746603	P	0.613134	P	0.596803	P	0.68631	P	0.892216	P	-1.59558	-1.08785	1.45517	0.436605	P	0.342541	P	0.621039	P	0.215251	P	0.194389	P	0.05	A	-2.02835	-1.76215	-12.4208
IFN1	orf19.1979	Phospholipid transporter activity	15.5581	P	12.8922	P	8.71282	P	5.00573	P	6.69506	P	4.87619	P	-3.10506	-1.92316	-1.78724	20.1371	P	12.2799	P	13.4555	P	7.08615	P	8.16069	P	8.30651	P	-2.84176	-1.50476	-1.61988	3.32209	P	4.61142	P	6.27883	P	3.24566	P	3.9484	P	3.23514	P	-1.02306	-1.16567	-1.92656
IFN3	orf19.1978	Phospholipid transporter activity	5.01963	P	5.31327	P	5.5226	P	3.25878	P	3.94637	P	3.75797	P	-1.52606	-1.39975	-1.45465	13.6147	P	8.45431	P	10.2791	P	3.49556	P	4.27068	P	5.10086	P	-3.85421	-1.99693	-2.03528	2.27965	P	1.76611	P	2.28517	P	2.00386	P	1.9975	P	2.08108	P	-1.14202	1.14955	-1.06917
IFR2	orf19.2396	--	8.90599	P	7.42967	P	9.11298	P	4.95114	P	4.75394	P	4.93432	P	-1.83815	-1.57962	-1.81958	16.392	P	14.5768	P	18.0203	P	8.39964	P	9.75146	P	7.47081	P	-1.95151	-1.49483	-2.41209	6.52556	P	5.84899	P	7.4379	P	5.54054	P	5.4484	P	8.78446	P	-1.0792	-1.10005	1.05106
IPF10029.5eoc	orf19.3915	--	6.51911	P	7.28993	P	4.82827	P	4.73206	P	4.37119	P	4.33482	P	-1.37765	-1.66772	-1.11383	3.16974	P	5.13111	P	4.76358	P	2.12034	P	3.34919	P	0.900075	P	-1.49492	-1.53204	-5.29243	2.60327	P	2.51473	P	2.66793	P	2.91409	P	2.46393	P	2.5527	P	1.1194	-1.02062	-1.04514
IPF10153	orf19.2170	--	18.3786	P	18.2282	P	18.4355	P	13.3969	P	17.1877	P	14.8334	P	-1.37634	-1.02363	-1.23928	17.6563	P	14.4869	P	17.6788	P	7.81061	P	8.70717	P	8.45584	P	-2.25225	-1.74011	-2.22727	6.3773	P	5.45534	P	7.42839	P	5.35956	P	5.1012	P	4.34595	P	-1.18519	-1.0679	-1.64059
IPF10355	orf19.3809	Transcription factor activity	0.167355	P	0.333538	P	0.723911	P	0.254198	M	0.369085	M	0.536613	P	1.51891	1.10658	-1.34904	0.232151	P	0.20856	P	0.399403	P	0.337478	P	0.252928	P	0.248877	P	1.4537	1.21274	-1.60482	0.842536	P	0.548803	P	1.10266	P	0.42278	P	0.349699	P	0.613514	P	-1.99285	-1.56936	-1.79729
IPF10662	orf19.5760	--	48.9277	P	44.1456	P	54.8003	P	49.3649	P	58.674	P	34.5271	P	1.00894	1.3291	-1.58717	29.86	P	18.4793	P	24.1272	P	12.7229	P	9.64202	P	7.94162	P	-2.34695	-1.91654	-3.03807	3.63753	P	2.48987	P	5.05323	P	1.79199	P	1.57164	P	2.28311	P	-2.01618	-1.59173	-2.21653
IPF11105	orf19.2262	--	1.05165	P	0.495086	P	0.799507	P	0.433588	P	0.796004	P	0.889883	P	-2.42547	1.60781	1.11304	3.3182	P	2.27174	P	3.08	P	1.71936	P	1.3825	P	1.59319	P	-1.92991	-1.64321	-1.93323	2.18405	P	1.64227	P	2.68695	P	0.888514	P	0.885271	P	1.11824	P	-2.47548	-1.86275	-2.42947
IPF11142	orf19.473	--	3.85795	P	7.92752	P	8.75349	P	2.54656	P	4.04206	P	3.65679	P	-1.50928	-1.91173	-2.44204	5.31513	P	4.15319	P	8.29851	P	2.92806	P	3.55015	P	5.29416	P	-1.81924	-1.17055	-1.53061	1.48057	P	0.986648	P	2.48479	P	1.39672	P	1.13327	P	2.08986	P	-1.05255	1.13455	-1.08514
IPF11448	orf19.2923	--	10.4638	P	10.9435	P	12.6434	P	6.83969	P	6.60357	P	6.94634	P	-1.52987	-1.65721	-1.82015	12.6293	P	9.94327	P	10.4101	P	6.0222	P	7.9019	P	7.81549	P	-2.09713	-1.25834	-1.33199	2.2638	P	2.12707	P	1.41825	P	2.35328	P	2.16934	P	1.90811	P	1.03953	1.01987	1.3454
IPF11503	orf19.3902	--	1.4344	P	1.33907	P	1.37469	P	0.69771	P	1.18927	P	0.742314	P	-2.05587	-1.12595	-1.8519	2.1617	P	1.17663	P	1.37851	P	0.527975	P	0.685578	P	0.522081	P	-4.09433	-1.71626	-2.64041	1.12832	P	0.89733	P	0.465779	P	0.238417	P	0.281563	P	0.12973	A	-4.78094	-3.18604	-3.61119
IPF11548	orf19.3854	Protein kinase activity	0.771694	P	2.07617	P	1.46426	P	0.778626	P	0.853838	P	1.47736	P	1.00898	-2.43157	1.00895	1.22931	P	1.6841	P	1.55701	P	0.75222	P	0.875915	P	0.954341	P	-1.63425	-1.92268	-1.63151	1.66973	P	1.78821	P	0.795944	P	1.55116	P	1.3517	P	0.554054	P	-1.07644	-1.32293	-1.43658
IPF11713	orf19.1152	--	41.0514	P	32.703	P	35.2823	P	19.7198	P	26.2976	P	15.367	P	-2.0823	-1.24261	-2.29232	25.9612	P	14.7891	P	13.8367	P	5.0857	P	6.82778	P	3.80445	P	-5.05437	-2.17286	-3.5114	4.36247	P	4.46455	P	2.13942	P	3.53764	P	4.43537	P	3.07297	P	-1.23288	-1.00551	1.45303
IPF11725	orf19.3475	--	22.3897	P	23.3145	P	24.6717	P	16.5233	P	24.3417	P	22.2789	P	-1.31625	1.04652	-1.11315	20.5851	P	18.5127	P	23.5522	P	11.0939	P	11.7709	P	13.8728	P	-1.88	-1.58441	-1.7541	5.43558	P	6.06123	P	6.53866	P	5.09411	P	4.9504	P	6.91486	P	-1.06812	-1.21606	1.06171
IPF11759	orf19.4737	--	36.6531	P	28.6419	P	21.8858	P	20.1595	P	15.1067	P	5.03605	P	-1.82561	-1.92072	-4.33427	27.9572	P	15.5985	P	17.746	P	10.3726	P	15.4193	P	10.2532	P	-2.68155	-1.01692	-1.74724	3.84202	P	6.49632	P	6.93283	P	3.38224	P	5.52655	P	3.17703	P	-1.12898	-1.1724	-2.18142
IPF11849	orf19.4559	--	0.27531	A	0.438575	A	0.992605	A	0.312214	A	0.602524	A	1.3829	P	1.13404	1.37382	1.3932	1.51726	P	3.85224	P	3.52776	P	1.23934	P	0.694729	P	1.68226	P	-1.22424	-5.54496	-2.09704	1.47137	P	1.1418	P	1.82763	M	0.959459	P	0.740481	P	0.656757	P	-1.53354	-1.54198	-2.78281
IPF11858	orf19.1277	--	2.72676	P	2.24846	P	1.27938	P	2.70725	P	2.47897	P	0.914757	P	-1.0131	1.10506	-1.21643	5.18132	P	4.74626	P	4.50537	P	2.4345	P	2.61274	P	1.94817	P	-2.00185	-1.79844	-2.39527	0.665644	P	0.947053	P	0.380228	P	0.47249	P	0.578156	P	0.422973	P	-1.39295	-1.61787	1.05987
IPF1193	orf19.2079	--	4.27402	P	3.81419	P	2.2309	P	3.21756	P	3.10726	P	2.36557	P	-1.35539	-1.06201	1.1202	4.10426	P	3.99066	P	3.23373	P	1.69738	P	2.29594	P	1.63866	P	-2.41363	-1.79187	-2.04114	3.58742	P	4.89963	P	1.79975	P	3.31612	P	4.31613	P	2.32027	P	-1.03047	-1.13687	1.12653
IPF12082.3f	orf19.6832	--	5.36105	P	5.00614	P	3.77239	P	3.21908	P	2.4122	P	1.83678	P	-1.6654	-2.07534	-2.05381	2.56501	P	2.38757	P	2.49194	P	3.06927	P	4.14678	P	2.48241	P	1.19659	1.73682	-1.00384	0.606339	P	0.98895	P	0.432193	P	0.811776	P	0.945892	P	0.597297	P	1.33881	-1.04552	1.38202
IPF12568	orf19.3516	--	5.08006	P	6.33477	P	6.13147	P	4.25038	P	7.2408	P	7.9251	P	-1.1952	1.14303	1.29253	9.83972	P	10.0309	P	11.8185	P	6.06838	P	5.93777	P	6.19648	P	-1.62147	-1.68934	-1.90729	4.73926	P	4.29282	P	4.3891	P	3.68243	P	3.97495	P	3.59459	P	-1.28699	-1.07997	-1.22103
IPF12577	orf19.5238	--	8.18078	P	7.12162	P	6.17666	P	4.7313	P	4.4448	P	4.24427	P	-1.72908	-1.60224	-1.45529	8.25154	P	6.34986	P	4.72836	P	4.76732	P	6.62299	P	5.9985	P	-1.73086	1.04301	1.26862	2.28119	P	2.42634	P	2.25222	P	2.23842	P	2.11022	P	2.67027	P	-1.01911	-1.1498	1.18562
IPF12579	orf19.5239	--	1.27428	P	0.933047	P	0.642564	P	1.19542	P	0.499474	P	0.644494	P	-1.06597	-1.86806	1.003	1.25816	P	1.45448	P	1.39463	P	0.743783	P	1.45205	P	1.14409	P	-1.69156	-1.00168	-1.21899	1.39877	P	1.26796	P	4.16223	P	0.722973	P	0.792585	P	0.778378	P	-1.93475	-1.59977	-5.34731
IPF12758.5f	orf19.334	--	0.67562	P	0.577088	P	1.29992	P	0.548855	P	0.809674	P	0.995528	P	-1.22853	1.40287	-1.29875	1.1513	P	1.08933	P	0.938507	P	0.610346	P	0.661054	P	0.543413	P	-1.87677	-1.65158	-1.73316	0.793456	P	0.72744	P	0.612801	P	0.456081	P	0.52004	P	0.360811	P	-1.7622	-1.4072	-1.54441
IPF12887	orf19.4780	--	10.3771	P	10.8642	P	11.244	P	5.27099	P	6.11987	P	4.59978	P	-1.96871	-1.77524	-2.44448	13.1423	P	10.1692	P	11.6621	P	7.34059	P	9.49414	P	7.21931	P	-1.79036	-1.0711	-1.6154	2.43149	P	2.0884	P	2.31432	P	2.24131	P	2.31463	P	3.03243	P	-1.08485	1.10833	1.31029
IPF1292	orf19.7381	Transcription factor activity	2.20609	P	4.53133	P	3.97864	P	2.90763	P	3.73081	P	5.6076	P	1.318	-1.21457	1.40943	3.64823	P	3.47928	P	4.56299	P	0.792629	P	1.17643	P	1.32186	P	-4.60269	-2.9575	-3.45195	2.00307	P	2.10313	P	1.9962	P	2.44112	P	2.23046	P	2.03649	P	1.21869	1.06054	1.02018
IPF13131.3	orf19.1587	Glucose transporter activity	1.73709	P	1.19287	P	3.30238	P	0.848855	P	0.981073	P	0.932364	P	-1.96976	-1.23814	-3.38668	5.04326	P	3.36702	P	4.12716	P	2.6139	P	2.06662	P	2.20284	P	-1.9364	-1.66203	-1.98627	1.62065	P	1.53913	P	2.12864	P	0.46332	P	0.390281	P	0.337162	A	-2.91734	-3.79295	-7.44639
IPF13377	orf19.2350	--	8.14876	P	5.36179	P	3.90797	P	3.83664	P	3.69716	P	1.68027	P	-2.12393	-1.45025	-2.3258	9.81986	P	5.22351	P	6.1594	P	6.31483	P	6.50915	P	6.55427	P	-1.55505	1.24613	1.06411	1.63599	P	1.19429	P	0.657795	P	0.897683	P	1.22244	P	0.763513	P	-1.82246	1.02357	1.16072
IPF1341	orf19.6420	--	8.05837	P	8.38514	P	10.9322	P	3.10115	P	5.19558	P	4.78647	P	-2.59062	-1.64243	-2.32921	0.674232	A	0.490829	A	0.866567	A	0.42429	A	0.291179	A	0.197418	A	-1.577	-1.65596	-3.80512	0.27863	A	0.327808	P	0.202788	A	0.540058	P	0.596693	P	0.730405	A	2.0515	2.88622	4.4909
IPF13493	orf19.5063	--	6.8187	P	5.11425	P	2.92194	P	1.60382	P	1.72871	P	1.89212	P	-4.25154	-2.95843	-1.54427	15.4288	P	12.2544	P	12.3636	P	11.9951	P	10.8115	P	11.0494	P	-1.28626	-1.13346	-1.11894	4.87832	P	4.44475	P	10.3042	P	2.86873	P	2.29559	P	4.18108	P	-1.70052	-1.93621	-2.46448
IPF13769	orf19.6209	Monocarboxylic acid transporter activity	1.0625	P	2.53378	P	2.11832	P	1.00763	P	1.99579	P	1.31694	P	-1.05445	-1.26956	-1.60852	1.50449	P	1.62432	P	2.14388	P	0.984014	P	0.908858	P	0.855539	P	-1.52893	-1.78721	-2.50588	1.24744	P	0.730663	P	1.93473	P	0.765444	P	0.454409	P	0.979054	P	-1.64118	-1.57774	-1.92065
IPF1384	orf19.6445	Dodecenoyl-CoA delta-isomerase activity	0.291839	P	0.239558	P	0.479047	P	0.277863	P	0.322818	P	0.27725	P	-1.0503	1.34756	-1.72785	0.296927	P	0.39572	P	0.321791	P	0.300178	P	0.191069	P	0.469686	P	1.01095	-2.07109	1.4596	0.50409	P	0.331492	P	0.612167	P	0.284749	P	0.181363	P	0.339189	P	-1.7703	-1.82778	-1.8048
IPF13879	orf19.1120	--	0.263946	P	0.194717	P	0.559573	P	0.584733	P	0.671924	P	0.749581	P	2.21535	3.45077	1.33956	0.564066	P	0.425951	P	0.423881	P	0.288632	P	0.285139	P	0.287799	P	-1.95427	-1.49384	-1.47283	0.249489	P	0.232965	P	0.149556	A	0.310811	P	0.298597	P	0.590541	M	1.24579	1.28173	3.94861
IPF1390	orf19.6449	--	0.340393	P	0.252457	P	0.566146	P	0.227481	P	0.520505	P	0.413639	P	-1.49636	2.06176	-1.3687	0.408983	P	0.191916	P	0.479403	P	0.313055	P	0.188507	P	0.242141	P	-1.30643	-1.01809	-1.97985	0.276074	P	0.0810313	P	0.30545	P	0.0637066	P	0.0460922	A	0.154054	A	-4.33352	-1.75803	-1.98275
IPF13921	orf19.4749	--	6.40857	P	7.9871	P	7.17543	P	3.41908	P	4.79811	P	4.82812	P	-1.87153	-1.67158	-1.49281	5.43097	P	4.80656	P	4.06627	P	1.52598	P	1.65758	P	1.5552	P	-3.59782	-2.87594	-2.23079	1.2362	P	0.987109	P	1.08112	P	1.00193	P	0.958918	P	1.16014	P	-1.1836	-1.017	1.00585
IPF13971	orf19.5204	--	0.432076	M	0.336302	P	0.234182	A	0.31145	A	0.343323	P	0.0967021	A	-1.32715	1.01828	-2.62082	0.496927	P	0.323539	M	0.342388	P	0.191829	A	0.212665	A	0.144087	A	-2.18433	-1.54602	-2.79172	0.177403	A	0.198435	P	0.313688	A	0.1139	P	0.153307	P	0.0939189	A	-1.48145	-1.23555	-3.12632
IPF1401	orf19.6066	--	5	P	6.72604	P	7.9811	P	3.02901	P	6.53838	P	4.73281	P	-1.65071	-1.0287	-1.68633	8.05248	P	7.6481	P	9.6	P	5.23135	P	5.14129	P	6.44049	P	-1.53927	-1.48758	-1.49057	3.94069	P	2.4825	P	6.26616	P	2.34653	P	2.41283	P	4.79595	P	-1.67937	-1.02888	-1.30655
IPF14501.5eoc	orf19.2455	--	0.32593	P	0.302826	P	0.467543	P	0.425191	P	0.487907	P	0.435998	P	1.30455	1.61118	-1.07235	0.458629	P	0.528193	P	0.426866	P	0.278863	P	0.343704	P	0.217814	P	-1.64464	-1.53677	-1.95977	0.523517	P	0.663904	P	0.652725	P	0.46139	P	0.526052	P	0.540541	P	-1.13465	-1.26205	-1.20754
IPF14598	orf19.4404	--	0.0909091	A	0.0583538	A	0.0476582	A	0.0137405	A	0.127234	A	0.0821688	A	-6.61616	2.1804	1.72413	0.236407	P	0.126698	P	0.159403	P	0.0928064	A	0.0669839	A	0.0688623	A	-2.54731	-1.89148	-2.31481	0.0562372	A	0.0672192	A	0.173638	A	0.054054	P	0.0731463	A	0.0135135	A	-1.04039	1.08818	-12.8492
IPF1471	orf19.304	--	4.03383	P	6.61241	P	5.29992	P	2.63053	P	4.39222	P	4.36976	P	-1.54397	-1.4752	-1.21588	4.85272	P	5.18801	P	6.35254	P	2.9425	P	3.45205	P	3.92066	P	-1.60435	-1.50763	-1.69231	1.83538	P	1.56031	P	2.74208	P	1.98649	P	1.68838	P	1.99054	P	1.06763	1.07585	-1.34059
IPF14744	orf19.5125	--	1.21488	P	0.554668	P	0.855382	P	0.906107	P	1.38275	P	0.502515	P	-1.34076	2.49294	-1.7022	0.716785	P	0.519361	P	0.644776	P	0.874778	P	0.550146	P	0.44985	P	1.22042	1.05927	-1.43331	1.56544	P	0.994475	P	0.397972	P	0.452703	P	0.373748	P	0.256757	A	-3.45799	-2.66082	-1.55
IPF14773.exon1	orf19.3586	--	1.07361	P	1.28409	P	1.07724	P	0.91145	P	1.75605	P	1.34656	P	-1.14897	1.36269	1.31272	1.14326	P	1.71824	P	2.97731	P	1.4163	P	1.028	P	0.562874	P	1.42176	-1.74449	-5.52965	1.36043	P	1.4489	P	2.23194	P	0.856178	P	0.880761	P	1.03378	P	-1.58838	-1.66344	-1.97914
IPF14871	orf19.4132	--	7.58109	P	4.81142	P	2.96754	P	3.76641	P	4.01788	P	2.82001	P	-1.85626	-1.30282	-1.04872	5.89858	P	4.77497	P	3.71373	P	2.1714	P	2.18924	P	2.02171	P	-2.51179	-2.05788	-1.72095	1.91667	P	2.05571	P	2.57414	P	1.56805	P	2.13778	P	2.19459	P	-1.23707	1.01196	-1.24552
IPF1505	orf19.348	--	3.83368	P	1.96007	P	1.59162	P	1.32443	P	1.51314	P	0.769704	P	-2.89459	-1.29536	-2.06783	1.52719	P	0.975204	P	0.805373	P	0.471581	P	0.643119	P	0.462949	P	-3.23844	-1.51637	-1.73966	0.126789	A	0.161142	A	0.181242	A	0.123552	P	0.129259	A	0.0202703	A	-1.0262	-1.24666	-8.94127
IPF15051	orf19.1258	--	0.26188	A	0.103194	A	0.128184	A	0.185496	A	0.0389064	A	0.154835	A	-1.41178	-2.65237	1.20791	0.0217494	A	0.0383832	A	0.01	A	0.01	A	0.045754	A	0.0187126	A	-2.17494	1.19203	1.87126	0.819018	P	0.725599	P	1.2763	P	0.321429	P	0.458918	P	0.481081	P	-2.54806	-1.58111	-2.65298
IPF15153	orf19.5867	--	3.56095	P	5.26996	P	6.07313	P	3.63664	P	6.22766	P	7.0886	P	1.02118	1.18525	1.16519	4.77116	P	4.16389	P	5.09045	P	2.40697	P	2.43814	P	1.94498	P	-1.9271	-1.74823	-2.62859	1.78681	P	1.39088	P	2.4379	P	1.90541	P	1.66032	P	2.94527	P	1.13754	1.20596	1.38144
IPF15177	orf19.750	--	1.95196	P	1.72973	P	1.95152	P	1.90153	P	1.88013	P	1.94634	M	-1.02652	1.08695	-1.00266	2.30733	P	1.68173	P	2.92418	P	1.37478	P	1.0205	P	1.46145	P	-1.67833	-1.64795	-2.00087	0.815951	P	0.815838	P	1.14068	P	0.917954	P	0.936874	P	0.764865	P	1.12501	1.14836	-1.49135
IPF15575	orf19.1247	--	2.55475	P	2.05835	P	1.90879	P	1.52595	P	1.41009	P	1.24371	P	-1.6742	-1.45973	-1.53475	4.09929	P	3.51427	P	3.95224	P	3.49556	P	2.81955	P	2.98241	P	-1.17271	-1.24639	-1.32518	3.66155	P	3.2965	P	4.48796	P	2.42278	P	3.51904	P	3.83243	P	-1.5113	1.06751	-1.17105
IPF15632	orf19.3469	--	4.14669	P	2.63022	P	4.42564	P	2.3916	P	2.20715	P	2.4768	P	-1.73386	-1.19168	-1.78683	3.2383	P	2.49898	P	2.55582	P	1.46536	P	1.60761	P	1.68937	P	-2.20989	-1.55447	-1.51288	1.66667	P	1.22744	P	2.63371	P	1.20174	P	1.1012	P	2.28649	P	-1.38688	-1.11464	-1.15186
IPF16067	orf19.3190	Specific RNA polymerase II transcription factor activity	0.957128	P	1.3016	P	1.19885	P	0.896183	P	1.08517	P	0.642817	P	-1.068	-1.19944	-1.86499	1.42506	P	1.38077	P	1.46507	P	0.880551	P	0.747438	P	0.601796	P	-1.61837	-1.84734	-2.4345	0.876278	P	0.765193	P	1.12167	P	0.366795	P	0.542084	P	0.656757	P	-2.38901	-1.41158	-1.7079
IPF1615.3eoc	orf19.980	--	9.76963	P	9.08231	P	12.5842	P	9.00763	P	8.85805	P	6.82336	P	-1.08459	-1.02532	-1.84428	7.15414	P	4.99355	P	7.07761	P	5.85613	P	4.33272	P	3.85255	P	-1.22165	-1.15252	-1.83713	5.70245	P	5.7919	P	10.7909	P	3.25	P	3.81563	P	4.57703	P	-1.7546	-1.51794	-2.35762
IPF16253	orf19.3932	--	3.39824	P	2.09152	P	1.765	P	2.20916	P	1.64458	P	1.20626	P	-1.53825	-1.27176	-1.4632	0.447754	P	0.348505	P	0.291343	P	0.210036	P	0.106149	P	0.173653	P	-2.1318	-3.28316	-1.67774	0.819018	P	0.505525	P	0.315589	P	0.297297	P	0.302605	P	0.451351	P	-2.75488	-1.67058	1.43019
IPF16752	orf19.2711	RNA polymerase II transcription elongation factor activity	1.51188	P	2.51044	P	1.83977	P	1.16412	P	1.55836	P	1.98658	P	-1.29873	-1.61095	1.0798	2.54657	P	3.02072	P	2.48776	P	1.60835	P	2.06625	P	1.43638	P	-1.58335	-1.46193	-1.73197	1.41104	P	1.4779	P	1.98099	P	1.5193	P	1.54108	P	1.62027	P	1.07672	1.04275	-1.22263
IPF17050	orf19.1049	--	0.108471	A	0.0823096	A	0.0558751	A	0.040458	A	0.01	A	0.01	A	-2.68108	-8.23096	-5.58751	0.113948	M	0.0866168	P	0.176119	P	0.01	A	0.0369693	A	0.01	A	-11.3948	-2.34294	-17.6119	0.0746421	P	0.100368	P	0.035488	A	0.0395753	A	0.0420842	A	0.0391892	A	-1.88608	-2.38494	1.1043
IPF17074	orf19.2792	--	14.9179	P	13.8667	P	10.0164	P	8.27252	P	10.7361	P	7.06987	P	-1.8033	-1.2916	-1.41678	7.57258	P	5.41984	P	5.8394	P	3.31616	P	3.5959	P	3.00187	P	-2.28354	-1.50723	-1.94525	1.64213	P	1.99355	P	2.99366	P	1.61004	P	1.88076	P	1.76486	P	-1.01993	-1.05997	-1.69626
IPF17094	orf19.2143	--	3.80527	P	5.75307	P	5.99425	P	3.16107	P	5.09253	P	4.564	P	-1.20379	-1.12971	-1.31338	3.52246	P	3.74524	P	5.36358	P	2.39432	P	2.2899	P	1.98877	P	-1.47118	-1.63555	-2.69693	3.35992	P	2.41436	P	5.24208	P	2.71525	P	2.79559	P	5.64054	P	-1.23742	1.1579	1.07601
IPF17190	orf19.3869	--	6.90599	P	9.28071	P	11.295	P	4.6855	P	8.81073	P	8.75238	P	-1.47391	-1.05334	-1.29051	11.8189	P	9.55503	P	11.8328	P	5.47069	P	4.78917	P	7.89222	P	-2.16041	-1.99513	-1.4993	2.98057	P	2.44936	P	6.17237	P	2.889	P	3.29759	P	5.86892	P	-1.0317	1.34631	-1.0517
IPF17430	orf19.73	--	0.0573347	A	0.149263	M	0.0460148	A	0.0679389	A	0.0157729	A	0.166574	P	1.18495	-9.46327	3.62	0.199527	P	0.277514	P	0.243582	P	0.131439	P	0.177526	P	0.0400449	A	-1.51802	-1.56323	-6.08272	0.861963	P	0.917127	P	0.637516	M	0.964286	P	0.906814	P	0.758108	P	1.11871	-1.01137	1.18916
IPF17706	--	--	0.424587	P	0.299754	P	0.332786	A	0.466412	P	0.370137	P	0.329793	P	1.09851	1.2348	-1.00907	0.169267	P	0.209918	P	0.22806	P	0.0488455	A	0.0186676	A	0.0490269	A	-3.46536	-11.245	-4.65172	0.398773	P	0.464088	P	0.931559	P	0.247104	P	0.433868	P	0.5	P	-1.61378	-1.06965	-1.86312
IPF18474	orf19.6610	Sturctural constituent of cytoskeleton	1.81043	P	2.04545	P	3.42975	A	1.90382	P	1.82229	P	2.04528	P	1.05158	-1.12246	-1.67691	1.96454	A	1.94565	P	3.2006	M	1.46625	P	1.47401	P	2.02882	A	-1.33984	-1.31997	-1.57757	2.73824	P	2.39227	P	5.54119	P	1.52799	P	1.4489	P	3.07027	P	-1.79205	-1.65109	-1.80479
IPF18712	orf19.2737	--	17.282	P	11.5676	P	14.0485	P	11.2634	P	15.326	P	8.17887	P	-1.53436	1.32491	-1.71766	4.41324	P	2.45245	P	2.56537	P	1.40364	P	1.43448	P	1.41093	P	-3.14414	-1.70964	-1.81822	1.70348	P	1.74862	P	0.722433	P	1.3668	P	1.48297	P	0.571622	P	-1.24633	-1.17914	-1.26383
IPF18732	orf19.711	--	0.954029	P	0.653563	P	0.938784	P	1.35534	P	0.817561	P	0.796255	P	1.40746	1.51743	-1.20086	0.778251	P	0.530401	P	0.587761	P	0.573712	P	0.608346	P	0.590943	P	-1.32993	1.12799	1.01775	0.998978	P	0.51105	P	1.11027	P	0.418436	P	0.311122	P	0.574324	A	-2.35468	-1.65777	-1.86608
IPF19749	orf19.94	--	1.2624	P	1.31143	P	0.967954	P	0.835878	P	1.33649	P	0.713248	P	-1.51026	1.01911	-1.35711	0.605674	P	0.540421	P	0.471642	P	0.43206	P	0.273426	P	0.502994	P	-1.40183	-1.97648	1.06647	1.59509	P	0.933702	P	0.671736	P	0.617761	P	0.502004	P	0.225676	P	-2.58206	-1.85995	-2.97656
IPF19772	orf19.5602	--	2.27324	P	2.55989	P	2.3106	P	1.95382	P	1.75289	P	1.77362	P	-1.14868	-1.50396	-1.20989	1.75366	P	1.57422	P	1.53104	P	1.36323	P	1.40867	P	1.72193	P	-1.30813	-1.12963	1.10402	0.75	P	0.69337	P	0.73384	P	0.5	P	0.378758	P	0.312162	P	-1.50302	-1.82638	-2.02268
IPF19814	orf19.7106	--	3.10847	P	3.11241	P	2.70666	P	1.81603	P	1.79706	P	1.52208	P	-1.71168	-1.73195	-1.77826	2.17352	P	1.54721	P	1.80716	P	2.36812	P	2.51647	P	3.11302	P	1.08953	1.62645	1.7226	0.601227	P	0.700737	P	0.515843	M	0.648649	P	0.531062	P	0.535135	P	1.07887	-1.3195	1.0374
IPF19859	orf19.3375	--	0.434401	P	0.262899	P	0.764996	P	0.342748	P	0.477392	A	0.491336	P	-1.26741	1.81588	-1.55697	0.537116	P	0.294497	P	0.530746	P	0.28508	M	0.178258	P	0.330464	P	-1.88409	-1.65209	-1.60606	0.201432	M	0.178637	P	0.475285	A	0.198842	P	0.210421	P	0.433784	A	-1.01302	1.17792	-1.09567
IPF20135	orf19.993	--	3.62448	P	2.56081	P	2.15037	P	1.53206	P	1.51314	P	1.36165	P	-2.36576	-1.69238	-1.57923	2.3182	P	1.99423	P	1.95642	P	1.26354	P	1.20626	P	1.00917	P	-1.8208	-1.68958	-1.96465	2.71881	P	2.55985	P	3.92522	P	3.14672	P	3.19038	P	3.11486	P	1.15739	1.24631	-1.26016
IPF2053	orf19.5267	--	5.37035	P	4.12439	P	3.8521	P	0.938168	P	0.767613	P	0.5436	P	-5.49343	-5.33645	-6.82508	12.0522	P	8.37296	P	8.55403	P	10.4383	P	8.69253	P	6.35123	P	-1.14788	1.03852	-1.28397	4.24233	P	3.38904	P	7.52155	P	4.12741	P	4.30411	P	5.18784	P	-1.03007	1.26847	-1.46673
IPF2275	orf19.6654	--	2.92924	P	5.15909	P	3.63763	P	1.33664	P	2.6551	P	1.86193	P	-2.19149	-1.94309	-1.95369	1.94421	P	2.25255	P	2.66687	P	0.988011	P	1.12903	P	0.647455	P	-1.9415	-1.95671	-4.0841	1.08078	P	0.825046	P	1.14322	P	0.956564	P	1.02204	P	1.28784	P	-1.12985	1.23877	1.1265
IPF2283	orf19.6660	--	1.49638	P	0.594595	P	0.366475	P	0.567176	P	0.243954	P	0.149804	P	-2.63831	-2.43733	-2.44636	0.934752	P	0.52038	P	0.647164	P	0.337478	P	0.339312	P	0.373877	P	-2.76982	-1.53363	-1.73095	0.406953	P	0.724678	P	0.205323	P	0.504826	P	0.501002	P	0.385135	P	1.2405	-1.44646	1.87575
IPF2319	orf19.6680	Transcription factor activity	2.55475	P	2.75184	P	2.17584	P	2.58092	P	2.74974	P	2.22806	P	1.01024	-1.00077	1.024	1.12009	P	1.30605	P	1.15761	P	0.726909	P	0.790264	P	0.726048	P	-1.5409	-1.65267	-1.5944	0.687117	P	0.85175	P	0.460076	P	0.761583	P	0.912826	P	0.843243	P	1.10838	1.07171	1.83283
IPF2374	orf19.6805	--	1.04236	P	1.79423	P	1.41495	P	0.609924	P	0.758149	P	2.8815	P	-1.70899	-2.36659	2.03646	0.661939	P	1.04144	P	1.47821	P	0.322824	P	0.486091	P	0.655314	P	-2.05046	-2.14248	-2.25572	1.72597	P	1.36556	P	1.60963	P	1.15637	P	0.890782	P	1.77027	P	-1.49258	-1.53299	1.0998
IPF2383	orf19.6808	--	0.893595	P	0.595209	P	0.998357	P	0.521374	P	0.247108	P	0.448295	P	-1.71392	-2.4087	-2.22701	0.470922	P	0.420856	P	0.576119	P	0.377886	P	0.472914	P	0.636602	P	-1.2462	1.12369	1.10498	0.52454	P	0.88674	P	0.799747	P	0.477799	P	0.629259	P	0.418919	P	-1.09782	-1.40918	-1.90907
IPF2522	orf19.7460	--	0.221074	P	0.20516	P	0.488907	P	0.132061	P	0.133544	P	0.229178	P	-1.67403	-1.53627	-2.1333	0.205674	P	0.194294	P	0.238209	P	0.240675	P	0.20571	P	0.292665	P	1.17018	1.05876	1.2286	0.348671	P	0.323204	P	0.667934	P	0.256757	P	0.317635	P	0.671622	P	-1.35798	-1.01753	1.00552
IPF2542	orf19.6629	Phospholipase C activity	1.56508	P	2.29361	P	2.12325	P	1.17328	P	1.46898	P	2.37228	P	-1.33394	-1.56136	1.11728	2.20284	P	2.5608	P	4.1409	P	1.41385	P	1.73682	P	2.07672	P	-1.55804	-1.47442	-1.99396	0.716769	P	0.785451	P	0.700887	P	0.702703	P	0.683367	P	0.722973	P	-1.02002	-1.14938	1.03151
IPF2645	orf19.7405	--	2.24483	P	1.66585	P	2.09449	P	1.27405	P	1.13775	P	1.09391	P	-1.76197	-1.46416	-1.91469	1.99953	P	1.78736	P	1.77373	P	1.67895	P	1.36896	P	1.25786	P	-1.19094	-1.30564	-1.41012	1.4683	P	1.63628	P	2.06464	P	1.36293	P	1.90381	P	1.23108	P	-1.07731	1.1635	-1.67709
IPF2710.repeat2	orf19.2158	Monosaccharide transporter activity	3.17769	P	4.0645	P	4.05382	P	1.60344	P	2.15931	P	1.82197	P	-1.96142	-1.85187	-2.08855	3.50733	P	3.08084	P	2.64239	P	1.1381	P	1.98865	P	1.67927	P	-3.08174	-1.54921	-1.57354	0.280164	P	0.445672	P	1.05323	M	0.173745	P	0.261523	P	0.716216	A	-1.6125	-1.70414	-1.47055
IPF2795	orf19.6763	--	9.65625	P	8.37807	P	7.29869	P	5.15611	P	5.33964	P	4.18921	P	-1.82601	-1.55918	-1.75834	4.1052	P	3.53923	P	3.33463	P	2.84503	P	2.5	P	2.67721	P	-1.41696	-1.46058	-1.28463	3.10634	P	3.28775	P	3.0564	P	3.75483	P	4.15581	P	2.7027	P	1.20341	1.24306	-1.07033
IPF2822	orf19.6781	Transcription factor activity	0.715909	P	0.792383	P	0.468365	P	0.3	P	0.33123	P	0.446059	P	-2.38636	-2.39224	-1.05001	0.521513	P	0.797894	P	0.482985	P	0.235346	P	0.259151	P	0.215943	P	-2.21594	-3.07888	-2.23663	0.477505	P	0.720074	P	0.74398	P	0.708494	P	0.512024	P	0.513513	P	1.48374	-1.40633	-1.4488
IPF2839	orf19.7296	--	0.695248	P	1.2285	P	0.892358	P	0.329008	P	0.758149	P	0.243153	A	-2.11317	-1.62039	-3.66995	1.32246	P	1.21026	P	1.98627	P	0.795293	P	0.804905	P	1.15569	P	-1.66286	-1.5036	-1.71869	1.56493	P	1.24401	P	0.705323	P	0.759653	P	0.701403	P	0.131757	A	-1.91893	-1.76693	-5.40337
IPF3092	orf19.4445	--	0.386364	P	0.550983	P	0.474117	P	0.429771	P	0.899054	P	0.484628	P	1.11235	1.63173	1.02217	0.286052	P	0.410326	P	0.352239	P	0.239343	P	0.215227	P	0.249626	P	-1.19516	-1.90648	-1.41107	1.52556	P	1.07182	P	0.629911	P	0.641892	P	0.533066	P	0.428378	P	-2.37667	-2.01068	-1.47046
IPF3506	orf19.6741	--	6.64359	P	9.61087	P	10.8652	P	4.11183	P	7.19926	P	9.43041	P	-1.56435	-1.3256	-1.14057	4.23877	P	4.4234	P	6.7197	P	0.586812	P	1.18119	P	1.35236	P	-6.38422	-3.6117	-4.98093	1.9862	P	1.81814	P	1.52535	P	2.18098	P	2.5992	P	4.19392	P	1.08334	1.45829	2.79581
IPF3539	orf19.2813	--	0.134298	A	0.0128993	A	0.0665571	A	0.0633588	A	0.0935857	A	0.059251	A	-2.11964	7.25512	-1.12331	0.0917258	A	0.0550272	A	0.08	A	0.0772647	M	0.0402635	A	0.010479	A	-1.18716	-1.36668	-7.63429	0.288344	P	0.350829	P	0.439797	P	0.1361	P	0.157315	P	0.282432	P	-2.11861	-2.23011	-1.55718
IPF3624	orf19.6713	--	1.61131	P	1.65356	P	2.26048	P	1.94847	P	2.24132	P	1.54835	P	1.20906	1.35287	-1.457	1.55106	P	1.41236	P	2.19821	P	0.786634	P	0.747804	P	0.747567	P	-1.85546	-1.8675	-2.81571	2.17638	P	1.66621	P	3.53739	P	0.908784	P	1.10972	P	1.675	P	-2.40164	-1.49916	-2.09212
IPF3631	orf19.6718	--	1.82025	P	1.61732	P	1.41413	P	1.42824	P	0.943218	P	1.30464	P	-1.27447	-1.71469	-1.08393	2.08794	P	2.43478	P	3.11642	P	0.165631	A	0.536237	P	0.506362	P	-12.606	-4.5405	-6.15452	1.4499	P	2.88306	P	1.70596	P	2.639	P	2.26754	P	1.96622	P	1.82013	-1.27145	1.15256
IPF3634	orf19.6720	--	6.08109	P	6.69103	P	7.14174	P	1.52252	P	1.8959	P	1.11263	P	-3.90835	-3.49808	-5.7966	6.86359	P	5.46467	P	7.38716	P	1.6532	P	1.4526	P	1.28031	P	-4.20653	-3.76802	-5.98858	2.16769	P	2.03591	P	1.57414	P	0.714286	P	0.755511	P	0.493243	P	-3.03476	-2.69475	-3.19142
IPF3661	orf19.899	--	0.991735	P	0.501843	P	0.406738	P	0.403817	P	0.322818	P	0.217999	P	-2.4559	-1.55457	-1.86578	0.675177	P	0.487092	P	0.446567	P	0.50222	P	0.531113	P	0.443488	P	-1.34438	1.09037	-1.00694	0.515337	P	0.525783	P	0.547528	A	0.367761	P	0.493988	P	0.308108	A	-1.40128	-1.06436	-1.77707
IPF3844	orf19.301	--	11.2017	P	10.4767	P	11.984	P	9.31832	P	11.0925	P	7.96311	P	-1.20439	1.05932	-1.50771	7.78251	P	6.241	P	8.92478	P	4.14831	P	4.08162	P	3.24551	P	-1.81812	-1.53192	-2.71814	3.36605	P	2.69797	P	6.17617	P	2.63658	P	2.6999	P	3.89797	P	-1.29037	1.00012	-1.44825
IPF3937	orf19.868	--	9.71307	P	9.62776	P	10.9704	P	9.36298	P	9.99474	P	8.18977	P	-1.03596	1.04454	-1.31521	15.8579	P	13.6731	P	10.8331	P	5.17562	P	6.81589	P	5.33308	P	-2.96828	-2.02048	-2.1651	4.47393	P	4.3582	P	6.91128	P	3.71187	P	3.99248	P	5.56081	P	-1.21475	-1.10966	-1.31934
IPF4065	orf19.1862	--	4.35382	P	0.962531	P	0.361545	P	1.51374	P	0.588854	P	0.171604	M	-2.8762	-1.63458	-2.10685	2.98227	P	1.22486	P	0.526567	P	0.367673	P	0.616581	P	0.261602	P	-8.30428	-1.92631	-1.93342	0.362986	P	1.14917	P	0.257288	P	0.485521	P	1.72846	P	0.241892	P	1.33758	1.50409	-1.06365
IPF407	orf19.7504	--	0.391529	P	0.463759	P	0.585867	A	0.480916	P	0.699264	P	0.618781	P	1.2283	1.50782	1.05618	0.864303	P	1.15115	P	0.824478	P	1.04307	P	1.33785	P	1.90681	P	1.20684	1.16218	2.31275	1.00204	P	0.743094	P	1.26616	P	0.678571	P	0.43487	P	0.528378	P	-1.4767	-1.70877	-2.39631
IPF409	orf19.7502	--	4.36777	P	1.23649	P	0.976993	P	0.603053	P	0.436383	P	0.243712	P	-7.24275	-2.83349	-4.00881	2.32293	P	2.18342	P	1.6406	P	0.69627	P	0.811127	P	0.763847	P	-3.33625	-2.69184	-2.14781	2.5726	P	2.14181	P	1.87199	P	1.07529	P	0.807615	P	0.494595	P	-2.39247	-2.65201	-3.7849
IPF4119.5	orf19.2959.1	--	50.6565	P	35.2264	P	26.7712	P	31.6546	P	34.48	P	11.1582	P	-1.60179	-1.03439	-2.40318	23.161	P	15.3427	P	14.9373	P	4.73734	P	5.11255	P	3.41467	P	-4.97221	-3.04898	-4.56453	17.8998	P	13.361	P	11.2326	P	8.0444	P	9.30711	P	7.85743	P	-2.24696	-1.46045	1.69302
IPF4351	orf19.5908	Specific RNA polymerase II transcription factor activity	0.957645	P	1.10964	P	1.78472	P	0.920611	P	1.1204	P	1.08357	P	-1.07658	-1.02717	-1.57297	2.33121	P	2.59273	P	3.21075	P	0.895648	P	0.793009	P	1.19349	P	-2.56694	-3.51847	-2.85936	2.89571	P	2.64088	P	10.1191	P	1.80936	P	2.0501	P	3.96081	P	-1.53806	-1.31906	-2.08397
IPF4537	orf19.905	--	17.469	P	14.6701	P	10.5004	P	7.79313	P	8.8244	P	6.55394	P	-2.24159	-1.66245	-1.60215	24.0898	P	15.6895	P	14.5654	P	9.6643	P	14.3715	P	11.6265	P	-2.49266	-1.09171	-1.25277	3.74029	P	4.20902	P	1.56274	P	3.72297	P	4.03908	P	2.24189	P	-1.00465	-1.04208	1.43459
IPF4667	orf19.1847	Carboxy-lyase activity	5.03512	P	3.17629	P	4.43468	P	2.31641	P	1.94269	P	2.44718	P	-2.18641	-1.63408	-1.84162	2.28605	P	1.76664	P	1.84358	P	0.639876	P	0.538067	P	0.636602	P	-3.57265	-3.28331	-2.89597	0.399795	P	0.415746	P	0.604563	A	0.33639	P	0.366733	P	0.467568	A	-1.0209	-1.16859	3.21212
IPF4674	orf19.1852	--	5.34814	P	4.49693	P	4.60477	P	3.87481	P	4.1346	P	3.36165	P	-1.38023	-1.08763	-1.36979	5.03782	P	3.62228	P	5.26269	P	3.38366	P	2.36896	P	2.84394	P	-1.48887	-1.52906	-1.85049	4.14826	P	3.49263	P	2.51458	P	3.06564	P	3.6022	P	2.38649	P	-1.35315	1.03137	-1.05367
IPF4704	orf19.5278	--	1.91994	P	1.58415	P	1.24076	P	1.18779	P	1.66456	P	1.06596	P	-1.6164	1.05076	-1.16398	2.06005	P	1.61685	P	2.04418	P	1.9032	P	1.43997	P	1.90681	P	-1.08241	-1.12283	-1.07204	1.5501	P	1.44936	P	1.06591	P	0.912162	P	0.878757	P	0.544595	P	-1.69937	-1.64932	-1.95725
IPF4928	orf19.7660	--	1.74432	P	1.8016	P	1.80033	P	1.63817	P	1.86646	P	1.24148	P	-1.0648	1.036	-1.45015	1.72246	P	1.79416	P	1.93552	P	1.01776	P	1.0959	P	1.28593	P	-1.6924	-1.63715	-1.50516	1.2546	P	1.19982	P	1.29785	P	0.872587	P	0.753507	P	1.04595	P	-1.4378	-1.59231	-1.24083
IPF4991	orf19.2531	--	1.25878	P	0.528255	P	0.42235	P	0.834351	P	0.585699	P	0.198435	A	-1.50869	1.10874	-2.12841	0.529078	P	0.335258	P	0.324776	P	0.0936945	A	0.0519766	A	0.0392964	A	-5.64684	-6.45018	-8.26478	1.26074	P	1.10313	P	0.276299	M	0.55695	P	0.601202	P	0.294595	A	-2.26364	-1.83487	1.06622
IPF4999	orf19.5843	--	4.19215	P	2.96683	P	4.13065	P	2.98473	P	1.36488	P	4.3052	P	-1.40453	-2.17369	1.04226	3.23782	P	2.62942	P	2.52418	P	0.492895	P	0.39019	P	0.324476	P	-6.56899	-6.7388	-7.77925	2.26687	P	1.05157	P	1.76299	P	1.84846	P	0.981964	P	2.96351	P	-1.22636	-1.07088	1.68096
IPF5282	orf19.5663	--	25.0553	P	24.3759	P	24.9951	P	17.016	P	15.6404	P	9.7697	P	-1.47245	-1.55852	-2.55843	24.9168	P	12.3016	P	12.4316	P	11.7957	P	13.5809	P	9.92777	P	-2.11236	1.10399	-1.25221	1.92025	P	2.30295	P	2.77947	P	1.91409	P	2.43587	P	3.58514	P	-1.00321	1.05772	1.28986
IPF5330	orf19.3448	--	17.4468	P	18.957	P	9.34429	P	9.00611	P	3.17876	P	5.22862	P	-1.93722	-5.96365	-1.78714	19.8756	P	20.0493	P	5.42328	P	4.87744	P	11.9173	P	10.3885	P	-4.07501	-1.68237	1.91553	0.523517	P	2.28269	P	0.542459	P	1.11969	P	1.08918	P	0.927027	P	2.13878	-2.09579	1.70894
IPF5353.3	orf19.3003	--	7.47056	P	9.12715	P	10.6294	P	5.76183	P	7.52471	P	7.58748	P	-1.29656	-1.21296	-1.40092	5.04539	P	4.5411	P	4.96179	P	2.91785	P	2.61969	P	2.58346	P	-1.72915	-1.73345	-1.9206	2.78834	P	2.35635	P	4.64259	P	2.53282	P	2.49499	P	4.34189	P	-1.10089	1.05884	-1.06925
IPF5360.3	orf19.3007.2	--	3.66529	P	3.0559	P	4.72802	P	4.07099	P	3.08623	P	2.31023	P	1.11069	1.00992	-2.04656	2.20142	P	1.44226	P	1.21075	P	0.74778	P	0.735725	P	0.38997	P	-2.94394	-1.96032	-3.10472	1.09816	P	0.838858	P	0.288973	A	0.503861	P	0.450902	P	0.141892	A	-2.17949	-1.8604	-2.03657
IPF5453	orf19.5692	--	1.20041	P	1.7027	P	1.71241	P	1.37099	P	1.83912	P	1.36557	P	1.1421	1.08012	-1.25399	1.54846	P	1.57371	P	1.74209	P	0.673179	P	0.878843	P	0.916542	P	-2.30022	-1.79066	-1.90072	0.40184	P	0.367403	P	0.38403	P	0.457529	P	0.397796	P	0.433784	P	1.13858	1.08272	1.12956
IPF5806	orf19.815	--	8.95713	P	9.19687	P	8.7009	P	6.46145	P	9.38591	P	10.0266	P	-1.36601	1.02059	1.1554	9.3513	P	8.86141	P	9.59254	P	5.3841	P	5.02837	P	4.67365	P	-1.72672	-1.76676	-2.06421	4.04601	P	3.68831	P	5.06971	P	3.67761	P	4.18537	P	6.02297	P	-1.10982	1.15119	1.205
IPF5849	orf19.5496	--	12.953	P	11.2862	P	10.7765	P	6.0374	P	7.07466	P	6.52487	P	-2.14546	-1.59531	-1.6516	13.7319	P	8.89538	P	10.6872	P	6.49156	P	8.09151	P	9.125	P	-2.11535	-1.09935	-1.1712	2.71881	P	2.94843	P	1.83777	P	3.13803	P	3.35571	P	3.64595	P	1.15419	1.13813	1.9839
IPF5966	orf19.6793	--	0.34969	P	0.403563	P	0.705012	P	0.291603	P	0.383807	P	0.359978	P	-1.1992	-1.05147	-1.95849	0.221749	P	0.217052	P	0.24597	P	0.12833	A	0.110542	P	0.144087	A	-1.72796	-1.96353	-1.7071	0.194274	P	0.111418	A	0.140684	A	0.125483	P	0.157315	P	0.331081	A	-1.54821	1.41193	2.35336
IPF5972	orf19.7314	--	5.15238	P	5.98219	P	4.8258	P	4.05649	P	6.12513	P	3.77306	P	-1.27016	1.0239	-1.27902	4.32388	P	5.1036	P	5.02806	P	2.70648	P	3.08053	P	2.29154	P	-1.5976	-1.65673	-2.19418	3.182	P	2.84254	P	3.25349	P	2.11004	P	2.58116	P	1.79054	P	-1.50803	-1.10126	-1.81704
IPF5988	orf19.7305	--	4.14695	P	3.55866	P	3.13681	P	1.33817	P	1.21556	P	0.951649	P	-3.09971	-2.92799	-3.29608	5.18558	P	3.89402	P	3.86925	P	0.613455	P	0.755124	P	0.767964	P	-8.36903	-5.14869	-5.04232	1.62014	P	1.57274	P	0.917617	P	0.910714	P	0.911323	P	0.961487	P	-1.79331	-1.72572	1.09774
IPF6003	orf19.1490	--	15.1049	P	17.6179	P	16.9318	P	15.7145	P	20.5247	P	16.1632	P	1.04036	1.16499	-1.04755	7.98014	P	7.12636	P	7.53194	P	4.67052	P	4.70644	P	4.26497	P	-1.70862	-1.51417	-1.766	2.82413	P	2.69705	P	1.54246	P	3.44691	P	3.16233	P	3.62162	P	1.22052	1.17251	2.34795
IPF6108	orf19.4811	--	2.58368	P	2.54668	P	2.69762	P	1.40229	P	1.04101	P	1.83343	P	-1.84247	-2.44636	-1.47135	2.41229	P	2.64096	P	2.71164	P	2.50799	P	2.34041	P	2.34244	P	1.03967	-1.12842	-1.15761	1.43252	P	1.29374	P	0.858048	P	1.47201	P	1.35471	P	1.02703	P	1.02757	1.04713	1.19693
IPF6181	orf19.4174	Nucleoside transporter activity	12.4607	P	10.1499	P	8.4774	P	6.91908	P	6.17035	P	3.93348	P	-1.80092	-1.64494	-2.15519	17.2525	P	12.751	P	9.50925	P	6.36501	P	11.0417	P	10.332	P	-2.71052	-1.1548	1.08652	2.0317	P	2.45396	P	3.29024	P	1.94305	P	2.24048	P	2.56892	P	-1.04562	-1.09528	-1.28079
IPF6274	orf19.6316	--	2.10744	P	1.71314	P	1.57518	P	1.20305	P	1.42166	P	1.06931	P	-1.75174	-1.20503	-1.47308	1.43215	P	1.30571	P	1.19403	P	0.577265	P	0.654832	P	0.394835	P	-2.48093	-1.99396	-3.02412	0.559305	P	0.593002	P	0.25602	A	0.632239	P	0.581162	P	0.428378	P	1.1304	-1.02037	1.67322
IPF6339	orf19.2724	--	1.84866	P	2.03317	P	2.85785	P	1.82977	P	2.09411	P	1.56903	P	-1.02252	1.03282	-1.82246	3.91206	P	4.51478	P	5.34746	P	1.22336	P	1.17204	P	1.29603	P	-3.29926	-3.82386	-4.26535	3.91462	P	3.01013	P	9.48542	P	1.14768	P	1.33768	P	3.44054	P	-3.24298	-2.25482	-2.3748
IPF6459	orf19.1890	--	4.73295	P	5.41401	P	5.96302	P	3.05878	P	5.04101	P	4.57798	P	-1.54733	-1.07399	-1.30255	4.85674	P	3.45788	P	3.96896	P	2.40853	P	2.04173	P	2.35629	P	-2.01648	-1.69361	-1.68441	1.97955	P	1.5267	P	2.33967	P	1.77606	P	1.59419	P	2.22703	P	-1.11457	1.0442	-1.05058
IPF6572	orf19.6874	--	4.94525	P	4.9527	P	5.75349	P	4.08168	P	4.36383	P	3.99497	P	-1.21157	-1.13494	-1.44018	4.58487	P	4.22283	P	5.53313	P	3.23979	P	3.13324	P	2.15307	P	-1.41518	-1.34775	-2.56988	3.66258	P	2.93278	P	3.49937	P	1.87838	P	1.78958	P	2.34189	P	-1.94986	-1.63881	-1.49425
IPF6679	orf19.1306	--	2.86674	P	1.98526	P	3.10025	P	1.81985	P	1.57992	P	2.23561	P	-1.57148	-1.26964	-1.38731	2.66903	P	2.13774	P	2.0609	P	2.73557	P	1.75549	P	1.84768	P	-1.05284	-1.23788	-1.12533	6.47699	P	6.28453	P	3.95881	P	2.76786	P	3.01052	P	2.30878	P	-2.38863	-2.12786	-1.65722
IPF6881	orf19.4246	--	12.0057	P	8.48342	P	8.33854	P	10.2229	P	9.87697	P	9.28787	P	-1.17557	1.14868	1.12213	7.72364	P	5.491	P	4.77493	P	2.84236	P	3.09773	P	2.43993	P	-2.63583	-1.78195	-1.94417	5.04806	P	4.45028	P	4.04119	P	3.33205	P	4.17936	P	2.96216	P	-1.47295	-1.07522	-1.4163
IPF6960	orf19.6654	--	5.13636	P	6.17598	P	6.55546	P	2.68817	P	3.4858	P	3.27166	P	-1.89198	-1.76233	-1.99857	6.46549	P	4.46501	P	4.58388	P	2.59902	P	3.44711	P	3.63323	P	-2.59431	-1.2894	-1.2086	1.74949	P	1.30203	P	2.07288	P	1.57288	P	1.31764	P	2.45743	P	-1.09846	1.05493	1.17363
IPF7109	orf19.7350	--	13.4463	P	14.7678	P	14.9433	P	13.842	P	16.2671	P	11.8077	P	1.02943	1.10152	-1.26555	12.6662	P	11.0883	P	10.8388	P	6.54085	P	6.88543	P	4.66542	P	-1.93647	-1.6104	-2.32322	7.02249	P	5.88214	P	7.18505	P	4.62355	P	4.8978	P	3.97838	P	-1.51885	-1.20098	-1.80602
IPF7204	orf19.2475	--	6.05837	P	3.82248	P	4.90633	P	1.85496	P	1.74553	P	2.75629	P	-3.26603	-2.18987	-1.78005	2.21702	P	1.28499	P	2.3594	P	6.22114	P	8.34151	P	7.53892	P	2.80608	6.49151	3.19527	0.54908	P	0.677716	P	0.74398	M	0.818533	P	0.738477	P	1.10135	P	1.49074	1.08965	1.48035
IPF7405	orf19.4666	--	7.72469	P	6.8965	P	4.97823	P	3.6584	P	4.39274	P	4.33678	P	-2.02288	-1.4889	1.04693	9.51915	P	7.22113	P	6.58836	P	3.51532	P	3.33382	P	3.38286	P	-2.78429	-2.24481	-1.90236	2.01636	P	2.03545	P	1.14322	P	1.86969	P	1.9489	P	2.68649	M	-1.0309	1.00878	1.85513
IPF7452	orf19.2045	--	6.59504	P	9.84459	P	12.6417	P	3.13969	P	4.50578	P	7.74902	P	-2.10054	-2.18488	-1.6314	12.6052	P	11.8516	P	13.5904	P	7.87833	P	7.99561	P	10.5531	P	-1.59998	-1.48226	-1.28781	3.87832	P	3.40608	P	2.74144	P	3.7278	P	3.36673	P	5.7973	P	-1.04038	-1.01169	2.11469
IPF7530	orf19.4531	ATP binding	1.00749	P	1.77334	P	1.28718	P	0.753817	P	1.11094	P	1.41056	P	-1.34266	-1.60537	1.0984	3.25603	P	4.0248	P	4.13821	P	1.33814	P	1.62299	P	1.8808	P	-2.44225	-2.47998	-2.11921	1.36503	P	0.992173	P	1.24461	P	0.965734	P	0.975952	P	0.993243	P	-1.38705	-1.01413	-1.09105
IPF7616	orf19.1159	Homoserine O-acetyltransferase activity	1.32025	P	1.54914	P	2.49384	P	1.72748	P	2.4143	P	2.01453	P	1.30845	1.55848	-1.23792	1.60142	P	1.32099	P	1.87701	P	0.710036	P	0.539165	P	0.946856	P	-2.25541	-2.45007	-1.98237	0.651329	P	0.479742	P	1.06591	P	0.454633	P	0.359719	P	0.675676	P	-1.43265	-1.33366	-1.57754
IPF7681	orf19.1397	Electron carrier activity	0.614669	P	0.820639	P	1.29581	P	0.512214	P	0.842271	P	1.66518	P	-1.20003	1.02636	1.28505	0.911584	P	0.838315	P	1.30567	P	0.517318	P	0.45937	P	0.68226	P	-1.76213	-1.82492	-1.91374	0.580777	P	0.507367	P	0.7782	P	0.665058	P	0.513026	P	1.06757	P	1.14512	1.01115	1.37184
IPF7711	orf19.681	--	0.382231	M	0.468673	A	0.907149	A	0.362595	M	0.284963	A	0.39128	A	-1.05415	-1.64468	-2.31841	0.356501	P	0.253057	P	0.50209	M	0.260213	A	0.200952	P	0.193862	A	-1.37004	-1.25929	-2.58993	0.579755	P	0.495396	P	1.13815	P	0.390927	P	0.326653	P	0.587838	M	-1.48303	-1.51658	-1.93616
IPF7715	orf19.2296	--	10.3843	P	6.45885	P	8.47905	P	7.34275	P	8.08623	P	3.99832	P	-1.41422	1.25196	-2.12065	1.8279	P	1.04857	P	1.43284	P	0.769094	P	0.629941	P	0.642216	P	-2.37669	-1.66456	-2.23108	1.57566	P	1.2965	P	4.59949	P	0.998069	P	1.001	P	1.38919	P	-1.57871	-1.2952	-3.31092
IPF7721	orf19.431	Transcription factor activity	2.93053	P	4.26228	P	4.22597	P	2.16603	P	3.75237	P	2.80129	P	-1.36406	-1.13885	-1.53102	4.54657	P	4.62874	P	6.01463	P	2.75155	P	2.79575	P	2.75206	P	-1.65673	-1.64075	-2.15842	2.33129	P	2.54328	P	3.49683	P	2.01979	P	2.21693	P	2.38716	P	-1.13735	-1.1357	-1.25532
IPF7733	orf19.4855	--	0.41374	P	0.312654	P	0.516845	P	0.238168	P	0.203996	P	0.257686	P	-1.73718	-1.53265	-2.00572	0.431679	P	0.638587	P	0.49791	P	0.400089	P	0.576501	P	0.501497	P	-1.07896	-1.1077	1.0072	0.783231	P	1.02947	P	0.793409	P	1.05309	P	0.743487	P	1.28649	P	1.34454	-1.38465	1.62147
IPF7785	orf19.2962	--	0.159607	M	0.192875	P	0.124897	A	0.0671756	A	0.0536278	A	0.181107	A	-2.37597	-3.59654	1.45005	0.172577	M	0.0879755	P	0.13194	M	0.0879219	A	0.0786969	A	0.160554	A	-1.96284	-1.1179	1.21687	0.152352	P	0.158379	P	0.30038	M	0.103282	P	0.104208	P	0.148649	A	-1.47511	-1.51983	-2.02074
IPF7999	orf19.4190	--	0.545454	P	0.702703	P	0.811011	P	0.420611	P	0.472135	P	0.677473	P	-1.29682	-1.48835	-1.19711	0.83026	P	0.919837	P	1.01851	P	0.433837	P	0.371157	P	0.495135	P	-1.91376	-2.4783	-2.05703	0.740286	P	0.712707	P	1.19899	P	0.989382	P	0.727455	P	1.27027	P	1.33649	1.02069	1.05945
IPF8302	orf19.6007	--	6.91529	P	9.99816	P	6.82169	P	3.07328	P	5.102	P	7.96311	P	-2.25013	-1.95966	1.16732	15.0965	P	15.4144	P	15.4054	P	7.53508	P	9.73316	P	10.2515	P	-2.00349	-1.5837	-1.50274	5.61656	P	6.47514	P	4.46388	P	5.61004	P	5.3477	P	7.12568	P	-1.00116	-1.21083	1.5963
IPF8307	orf19.6005	Glucose transporter activity	1.39979	P	1.04361	P	0.84963	P	1.18397	P	1.14406	P	0.603689	P	-1.18229	1.09625	-1.4074	0.491253	P	0.332201	P	0.338507	P	0.222913	P	0.22877	P	0.141093	P	-2.20379	-1.45212	-2.39918	0.221881	P	0.210866	P	0.474018	P	0.155405	P	0.155311	P	0.145946	A	-1.42776	-1.3577	-3.2479
IPF8369	orf19.6077	--	9.46849	P	7.1812	P	6.99918	P	3.83588	P	4.86961	P	2.19564	P	-2.4684	-1.4747	-3.18776	4.74917	P	2.97062	P	3.0203	P	1.34036	P	1.57705	P	1.36115	P	-3.50463	-1.89369	-2.24319	1.6319	P	1.08471	P	0.923954	P	0.76834	P	0.776553	P	0.936487	P	-2.12393	-1.39683	1.01356
IPF8535	orf19.5302	--	0.847107	P	0.502457	P	1.24651	P	1.18397	P	1.15983	P	0.982113	P	1.39766	2.30832	-1.26921	0.322459	P	0.430707	P	0.419702	P	0.28952	P	0.277818	P	0.309506	P	-1.11377	-1.55032	-1.35604	0.238241	P	0.297422	P	0.47782	P	0.140927	P	0.10521	P	0.172973	A	-1.69053	-2.82692	-2.7624
IPF8901	orf19.3758	--	1.9375	P	1.77887	P	1.41495	P	0.295038	P	0.419558	P	0.283958	P	-6.16058	-3.36927	-4.14988	0.728605	P	0.620754	P	0.931343	P	0.425622	P	0.433748	P	0.265906	P	-1.58247	-1.5014	-3.45417	0.439162	P	0.677256	P	0.601394	P	0.552606	P	0.31012	P	0.458108	M	1.22614	-2.05454	-1.26808
IPF9057	orf19.1189	DNA bending activity	1.57386	P	0.871007	P	0.852095	P	0.516031	P	0.378549	P	0.32588	P	-3.04994	-2.30091	-2.61475	1.81466	P	1.32846	P	0.748657	P	0.9627	P	1.38324	P	1.34431	P	-1.88497	1.04123	1.79563	2.20552	P	2.33057	P	3.43599	P	0.695946	P	1.20441	P	1.13784	P	-3.1691	-1.93503	-3.01976
IPF9126	orf19.5537	--	1.21901	P	1.44779	P	2.49959	P	1.30153	P	1.18297	P	1.53158	P	1.06769	-1.22386	-1.63203	0.843026	P	0.863111	P	0.815522	P	0.465364	P	0.528917	P	0.508982	P	-1.81154	-1.63185	-1.60226	0.489775	P	0.399632	P	0.385298	A	0.624517	P	0.571142	P	0.687838	P	1.27511	1.42917	1.78521
IPF9132	orf19.5541	--	2.74948	P	4.4312	P	3.36647	P	2.17099	P	4.53102	P	4.70989	P	-1.26646	1.02253	1.39906	6.33522	P	5.43648	P	5.06328	P	2.73845	P	3.74378	P	2.24925	P	-2.31343	-1.45214	-2.2511	3.27812	P	2.5709	P	3.70849	P	3.02124	P	3.01102	P	4.14189	P	-1.08503	1.17119	1.11687
IPF9145	orf19.6245	--	2.05269	P	1.67383	P	1.28924	P	1.50992	P	1.29443	P	0.987703	P	-1.35946	-1.29311	-1.30529	1.88842	P	1.71162	P	1.37254	P	0.816608	P	1.12921	P	0.813997	P	-2.31251	-1.51577	-1.68617	2.30368	P	1.72836	P	1.8365	P	1.30598	P	2.2014	P	0.556757	P	-1.76394	1.27369	-3.29857
IPF9167	orf19.2737	--	11.9256	P	8.33907	P	12.2071	P	8.74733	P	13.5731	P	6.7602	P	-1.36334	1.62765	-1.80573	3.01087	P	2.07507	P	1.63463	P	1.70115	P	1.14275	P	1.00823	P	-1.7699	-1.81585	-1.62128	1.49693	P	1.34807	P	2.06464	P	1.12452	P	1.23447	P	1.01757	P	-1.33118	-1.09202	-2.02899
IPF9282	orf19.1510	--	8.58213	P	10.535	P	7.94166	P	6.52672	P	9.76236	P	5.70486	P	-1.31492	-1.07915	-1.39209	6.16123	P	5.10428	P	6.02269	P	3.70515	P	3.41801	P	2.0509	P	-1.66288	-1.49335	-2.93661	1.94274	P	1.77716	P	3.02281	P	1.19015	P	1.27856	P	1.24865	P	-1.63234	-1.38998	-2.42087
IPF9425.3	orf19.6888	--	0.204545	A	0.174447	A	0.173377	A	0.40916	P	0.242902	A	0.136948	A	2.00034	1.39241	-1.26601	0.534279	P	0.518682	P	0.576119	P	0.364121	P	0.303807	P	0.242141	P	-1.46731	-1.70728	-2.37928	0.247444	P	0.3407	P	0.273764	A	0.202703	P	0.250501	P	0.209459	A	-1.22072	-1.36007	-1.307
IPF946	orf19.7561	--	4.41632	P	5.40049	P	7.02219	P	6.90611	P	6.46162	P	5.97289	P	1.57587	1.19988	-1.16954	3.18582	P	4.34817	P	5.03463	P	1.47091	P	0.964312	P	0.803144	P	-2.14006	-4.53118	-5.50838	0.908487	P	1.26796	P	1.74335	P	0.922297	P	1.61573	P	0.745946	P	1.0675	1.24656	-2.57952
IPF9483	orf19.3395	--	8.90393	P	7.80651	P	5.20542	P	3.48244	P	4.82334	P	2.07127	P	-2.55734	-1.60895	-2.51115	6.87116	P	5.36328	P	5.62806	P	2.56461	P	2.7101	P	2.50749	P	-2.6546	-1.98972	-2.26057	2.65235	P	1.8918	P	2.83714	P	1.19064	P	0.958417	P	1.51081	P	-2.23567	-1.9704	-1.84494
IPF9605	orf19.3071	Protein tyrosine phosphatase activity	11.2836	P	7.65602	P	3.53739	P	4.36641	P	3.99264	P	2.30855	P	-2.58418	-1.91753	-1.5323	4.15035	P	2.6644	P	2.28239	P	2.12922	P	2.51061	P	2.15195	P	-1.94924	-1.06125	-1.06062	0.521472	P	0.627072	P	0.462611	A	0.658301	P	0.624248	P	0.722973	P	1.26239	-1.00452	1.56281
IPF9616	orf19.4910	--	9.33239	P	8.96407	P	8.55136	P	4.18015	P	4.796	P	4.11235	P	-2.23027	-1.86872	-2.07549	16.079	P	11.5207	P	15.8588	P	12.6374	P	11.2224	P	11.1475	P	-1.26027	-1.02682	-1.43457	3.97955	P	3.40239	P	5.43536	P	5.33977	P	5.1994	P	8.93446	P	1.34239	1.52973	1.79304
IPF9703	orf19.4880	--	0.431818	P	0.486486	P	0.734593	P	0.382443	P	0.370137	P	0.470095	P	-1.12911	-1.31434	-1.56265	0.500709	P	0.299592	P	0.322985	P	0.271758	M	0.24817	P	0.32485	P	-1.84248	-1.20721	1.00577	0.526585	P	0.530387	P	0.973384	P	0.281853	P	0.252505	P	0.532432	P	-1.86829	-2.1005	-1.82818
IPF9706	orf19.4883	--	1.22107	P	1.207	P	0.547247	P	0.287023	P	0.633018	P	0.257686	P	-4.25427	-1.90674	-2.1237	0.331442	P	0.261889	P	0.245373	P	0.406306	P	0.270864	P	0.371632	P	1.22587	1.03427	1.51456	0.397751	P	0.392265	P	0.375158	P	0.431467	P	0.333667	P	0.468919	P	1.08477	-1.17562	1.24992
IPF9821.3f	orf19.4142	--	0.47469	P	0.662776	P	0.740345	P	0.359542	P	0.401682	P	0.688094	P	-1.32026	-1.65	-1.07594	0.533333	P	0.618546	P	0.860299	P	0.217584	P	0.310395	P	0.290045	P	-2.45116	-1.99277	-2.96609	0.349693	P	0.221915	P	0.816223	M	0.360039	P	0.350701	P	0.57973	P	1.02958	1.58034	-1.40794
IPF9898	orf19.3406	--	0.57438	P	1.38575	P	0.92728	P	0.587405	P	0.823344	P	1.064	P	1.03598	-1.66985	1.17529	0.909929	P	1.07065	P	1.52716	P	0.630107	P	0.849012	P	1.59674	P	-1.16303	-1.26184	1.0226	0.447341	P	0.43232	P	0.770596	P	0.275097	P	0.256513	P	0.397297	A	-1.62929	-1.64618	-1.9092
IPF993	orf19.4595	--	3.83574	P	2.10627	P	1.33443	P	2.51374	P	1.32808	P	0.906652	P	-1.52591	-1.58595	-1.47182	4.01702	P	2.92969	P	1.40836	P	2.15853	P	3.7511	P	2.29042	P	-1.861	1.28037	1.6263	0.522495	P	0.941989	P	0.562738	P	0.792471	P	1.02505	P	0.181081	A	1.51671	1.08818	-3.10766
IPT1	orf19.4769	Transferase activity	4.59866	P	8.85012	P	9.25226	P	3.27939	P	5.88854	P	8.88821	P	-1.40229	-1.50294	-1.04096	8.10024	P	7.61651	P	11.7469	P	5.42007	P	4.14971	P	4.86078	P	-1.49449	-1.83543	-2.41666	3.62883	P	2.73204	P	7.16857	P	3.00869	P	3.20341	P	4.50811	P	-1.20612	1.17253	-1.59015
KRE2.3f	orf19.4377	--	0.729339	A	0.885749	M	2.02547	M	0.558015	A	0.948475	A	3.07099	P	-1.30702	1.07082	1.51618	1.61655	P	1.24898	P	2.17075	P	0.914743	M	0.699121	P	0.851796	P	-1.76722	-1.7865	-2.54843	1.909	P	0.799263	P	5.41952	P	2.02799	P	1.41483	P	3.06081	P	1.06233	1.77017	-1.77062
KRE2.5f	orf19.4349.6	--	0.603822	P	0.653563	P	1.56039	P	0.436641	P	0.567823	P	2.99776	P	-1.38288	-1.151	1.92116	0.47234	P	0.5625	P	1.09672	P	0.293517	P	0.341874	P	0.240644	P	-1.60924	-1.64534	-4.55743	1.3773	P	0.567219	P	2.07731	P	1.35425	P	0.983968	P	3.03108	P	-1.01702	1.73472	1.45914
MAE1	orf19.3419	Malate dehydrogenase activity	27.2051	P	33.6812	P	35.2621	P	31.9481	P	41.9432	P	28.3667	P	1.17434	1.2453	-1.24308	19.7338	P	18.5795	P	22.5684	P	12.3672	P	12.7771	P	13.7784	P	-1.59565	-1.45413	-1.63795	6.97546	P	8.78637	P	12.2421	P	7.03668	P	11.2766	P	9	P	1.00878	1.28341	-1.36023
MAL31	orf19.3981	Alpha-glucoside:hydrogen symporter activity	0.141787	A	0.121929	A	0.262531	A	0.124046	A	0.962145	P	0.372834	A	-1.20991	24.1068	5.55078	0.733097	M	0.960598	P	1.38448	P	0.385435	M	0.29429	A	0.54491	A	-1.90382	-3.30978	-2.49631	1.19018	P	0.554328	P	0.415716	P	0.42471	P	0.273547	P	0.183784	P	-2.80234	-2.02644	-2.26198
MEP3	orf19.1614	Ammonium transporter activity	12.4607	P	12.0289	P	14.9992	P	9.15191	P	8.18402	P	4.80715	P	-1.36155	-1.4698	-3.12018	10.7721	P	4.34443	P	5.83045	P	4.07593	P	3.82943	P	3.60329	P	-2.64286	-1.13449	-1.61809	3.83333	P	3.91437	P	2.13181	P	1.84846	P	1.5521	P	1.35405	P	-2.0738	-2.52197	-1.57439
MET1	orf19.5811	Uroporphyrin-III C-methyltransferase activity	1.35331	P	1.44902	P	2.18324	P	1.04771	P	1.37119	A	1.47876	M	-1.18589	-1.06126	-1.60874	1.49929	P	1.50238	P	1.96746	P	0.526199	A	0.570461	P	0.947792	A	-2.94891	-2.94812	-2.1711	0.687117	P	0.451197	A	1.07541	A	0.560811	P	0.50501	P	1.08243	A	-1.15005	1.10768	-1.00148
MET10	orf19.4076	Sulfite reductase (NADPH) activity	3.13223	P	3.60565	P	3.97576	P	1.59695	P	1.61935	P	2.4005	P	-1.85928	-2.3245	-1.68837	4.37494	P	4.67001	P	4.16925	P	2.76488	P	3.05051	P	4.12818	P	-1.67021	-1.50269	1.12061	2.29039	P	1.86971	P	1.91445	P	1.70705	P	1.93938	P	2.51014	P	-1.32923	1.05488	1.33866
MET14	orf19.946	Adenylylsulfate kinase activity	1.22856	P	1.0949	P	1.04355	P	0.690076	P	0.641956	P	0.840414	P	-1.79754	-1.66683	-1.18367	4.43735	P	5.07048	P	4.8194	P	2.13166	P	1.85011	P	1.57036	P	-2.05024	-2.75064	-3.059	0.521984	P	0.855893	P	0.970849	P	0.608591	P	1.04609	P	1.61149	P	1.23894	1.23268	1.84327
MET15	orf19.5645	O-acetylhomoserine aminocarboxypropyltransferase activity	7.94034	P	7.0086	P	8.25596	P	6.41489	P	8.60673	P	5.4374	P	-1.23898	1.2352	-1.51935	9.51158	P	9.02123	P	10.9146	P	5.41985	P	5.29539	P	5.91635	P	-1.75773	-1.6875	-1.81581	2.32566	P	2.20304	P	5.04183	P	2.0333	P	2.26553	P	3.36892	P	-1.13868	1.03116	-1.2852
MET2	orf19.2618	Homoserine O-acetyltransferase activity	8.33368	P	7.04853	P	11.8817	P	8.72214	P	7.61619	P	6.16378	P	1.04661	1.08054	-1.92766	5.06619	P	3.80027	P	4.28955	P	2.91385	P	2.34297	P	2.35853	P	-1.73866	-1.62199	-1.81874	2.98159	P	2.93554	P	4.52598	P	1.88514	P	1.66333	P	2.17568	P	-1.58163	-1.76486	-2.08027
MET3	orf19.5025	Sulfate adenylyltransferase (ATP) activity	0.364928	P	0.429975	P	0.350452	M	0.274809	A	0.291798	M	0.275293	A	-1.43436	-1.3432	-1.30239	5.02033	P	5.12381	P	4.14866	P	0.642984	P	0.665996	P	0.51628	P	-7.82521	-7.80893	-8.14413	0.117587	M	0.129374	P	0.412548	P	0.109556	P	0.158317	P	0.220946	P	-1.02633	1.21198	-1.7171
MLS1	orf19.4833	Malate synthase activity	5.13378	P	2.74908	P	4.14256	P	3.38817	P	2.99106	P	1.31191	P	-1.49655	1.07521	-3.2189	2.38369	P	1.20143	P	1.67075	P	1.56306	P	1.39129	P	1.73728	P	-1.53523	1.16457	1.09554	1.43456	P	1.15976	P	1.00951	P	0.670849	P	0.675852	P	0.443243	P	-2.16712	-1.68093	-2.41699
MSC2	orf19.3132	Cation:cation antiporter activity	4.20558	P	5.4914	P	4.94412	P	3.65038	P	7.82755	P	3.27613	P	-1.15209	1.42542	-1.50913	6.63357	P	5.00238	P	6.39582	P	4.48224	P	3.40227	P	2.68376	P	-1.47997	-1.47031	-2.38316	1.76176	P	1.75322	P	1.48289	P	1.55888	P	1.45892	P	2.42838	P	-1.13014	-1.20173	1.6376
MTD1	orf19.3810	Methylenetetrahydrofolate dehydrogenase (NAD+) activity	7.95893	P	7.13022	P	16.8599	P	5.50191	P	4.63039	P	7.21185	P	-1.44606	-1.54273	-2.27706	7.14988	P	5.1965	P	6.81015	P	6.38877	P	3.43924	P	3.3939	P	-1.03755	-1.50141	-2.04604	9.11401	P	7.44107	P	15.4512	P	2.83929	P	2.83216	P	4.61081	P	-3.21291	-2.63342	-3.3186
MUP1	orf19.5280	L-methionine porter activity	30.5558	P	30.6904	P	35.4462	P	20.4466	P	15.3596	P	15.9804	P	-1.49442	-1.99812	-2.2181	17.1267	P	11.9052	P	18.6352	P	7.3135	P	9.06149	P	8.71332	P	-2.3418	-1.31383	-2.1387	13.863	P	9.08379	P	13.1077	P	9.8195	P	8.3487	P	23.4959	P	-1.41178	-1.08805	1.79253
MUP3	orf19.321	L-methionine porter activity	6.34969	P	4.53747	P	2.32539	P	2.71069	P	2.67823	P	1.26272	P	-2.34247	-1.6942	-1.84158	5.29693	P	2.93105	P	2.81493	P	2.53597	P	2.71083	P	2.4113	P	-2.08872	-1.08123	-1.16739	1.62168	P	1.85083	P	1.14322	P	1.03668	P	1.43587	P	0.863514	P	-1.5643	-1.28899	-1.32392
NTA1	orf19.850	Protein N-terminal asparagine amidohydrolase activity	0.245868	P	0.29484	P	0.411668	P	0.245802	P	0.208202	P	0.319732	P	-1.00027	-1.41613	-1.28754	0.322459	P	0.350543	P	0.26806	M	0.211368	M	0.214129	P	0.171781	M	-1.52558	-1.63707	-1.56047	0.226994	P	0.234807	P	0.657795	P	0.30888	P	0.218437	P	0.224324	P	1.36074	-1.07494	-2.93234
OAC1	orf19.7411	Oxaloacetate carrier activity	0.043905	A	0.215602	A	0.196385	A	0.0435115	A	0.064143	A	0.038569	A	-1.00904	-3.36127	-5.09177	0.422695	P	0.40659	P	0.546269	P	0.249556	M	0.150805	M	0.156063	M	-1.69379	-2.69612	-3.50031	0.591002	P	0.464088	P	1.20279	P	0.294402	P	0.302605	P	0.190541	P	-2.00747	-1.53364	-6.31251
OPT1	orf19.2602	Oligopeptide transporter activity	39.0868	P	40.6333	P	48.8965	P	24.6916	P	43.6661	P	22.083	P	-1.58309	1.07305	-2.21838	32.8981	P	21.6953	P	29.8415	P	7.22913	P	8.98975	P	6.9113	P	-4.5215	-2.41021	-4.36866	4.6411	P	3.90193	P	4.75856	P	8.10473	P	9.20842	P	13.9405	P	1.77221	2.37675	3.042
OSM2	orf19.5005	Fumarate reductase (NADH) activity	1.69783	A	1.04791	A	1.5152	A	2.11069	A	3.28707	M	2.29961	A	1.24317	3.13678	1.51769	2.3948	P	2.17969	P	2.19403	P	2.22691	P	1.70717	P	2.37275	P	-1.07539	-1.27678	1.08146	1.03374	P	0.881216	P	1.28771	M	0.59749	P	0.513026	P	0.108108	A	-1.73014	-1.71768	-11.9113
PAD1	orf19.5731	Carboxy-lyase activity	0.496643	P	0.461302	P	0.506984	P	0.619847	P	0.465825	P	0.401062	P	1.24801	1.01217	-1.12238	0.384161	P	0.402004	P	0.398209	P	0.227798	P	0.18631	P	0.21482	P	-1.68112	-2.04636	-1.82288	0.362474	P	0.402394	P	0.86692	P	0.294402	P	0.398798	P	0.394595	P	-1.18351	1.01053	-2.21243
PAP12	orf19.3197	RNA binding	4.68518	P	5.96253	P	6.03287	P	4.81565	P	5.68034	P	5.95892	P	1.03288	-1.04065	-1.01833	3.28771	P	3.58067	P	3.30448	P	0.0274245	A	0.0289751	A	0.0222156	A	-114.891	-116.923	-119.694	2.65746	P	2.38582	P	1.37706	P	2.84652	P	2.77104	P	2.87162	P	1.06672	1.15689	2.0861
PCK1	orf19.7514	Phosphoenolpyruvate carboxykinase (ATP) activity	34.9551	P	35.2088	P	33.3016	P	24.1828	P	43.4285	P	14.2236	P	-1.44657	1.23431	-2.35165	18.4161	P	16.6595	P	17.5588	P	3.88233	P	4.32211	P	6.00505	P	-4.75615	-3.87918	-2.88436	12.8645	P	10.93	P	15.2598	P	6.33591	P	8.09319	P	8.30608	P	-2.04612	-1.35544	-1.82582
PHO87	orf19.2454	Inorganic phosphate transporter activity	22.5687	P	23.9244	P	19.0929	P	12.2847	P	12.4795	P	12.2281	P	-1.83713	-1.9171	-1.5614	18.7674	P	16.0591	P	13.7791	P	7.58037	P	10.5296	P	7.13922	P	-2.47578	-1.52513	-1.93006	8.51636	P	7.59945	P	4.29278	P	7.32529	P	8.92184	P	8.39865	P	-1.1626	1.17401	1.95646
PIK1	orf19.3199	1-phosphotidylinositol 4-kinase activity	2.84272	P	2.55682	P	2.85661	P	3.05649	P	2.15825	P	2.05478	P	1.08076	-1.18031	-1.37161	1.58251	P	1.23896	P	1.2794	P	0.0749378	A	0.038675	M	0.112784	P	-19.0879	-30.4792	-11.4641	1.11708	P	1.17403	P	0.974651	P	1.04681	P	1.14479	P	1.27973	P	-1.03337	-1.04061	1.41199
PMT2	orf19.6812	Dolichyl-phosphate-mannose-protein mannosyltransferase activity	34.3626	P	31.3145	P	35.9564	P	23.3847	P	16.8644	P	22.4421	P	-1.46945	-1.85685	-1.60218	30.3712	P	19.426	P	16.2012	P	15.6909	P	20.0399	P	14.2949	P	-1.93559	1.0316	-1.13335	7.03783	P	5.89042	P	5.37009	P	6.15637	P	6.20441	P	7.30135	P	-1.14318	1.0533	1.35963
POL21.3	orf19.2669	Di-, tri-valent inorganic cation transporter activity	0.331612	P	0.412776	P	0.40756	P	0.18626	P	0.241851	P	0.271101	P	-1.78037	-1.70674	-1.50335	0.0236407	A	0.01	A	0.0113433	A	0.01	A	0.01	A	0.01	A	-2.36407	1	-1.13433	0.0306748	A	0.014733	A	0.0684411	A	0.01	A	0.01	A	0.108108	P	-3.06748	-1.4733	1.57958
POT1	orf19.1704	Acetyl-CoA C-acyltransferase activity	0.894886	P	0.867629	P	0.958094	P	0.768321	P	1.64301	P	1.45724	P	-1.16449	1.89011	1.96156	0.558629	P	0.734375	P	1.42776	P	0.831927	P	0.555271	P	0.597118	P	1.50743	-1.318	-2.30794	1.61963	P	1.1395	P	1.35615	P	0.903475	P	0.70491	P	0.587162	P	-1.77818	-1.62067	-2.09176
POX18	orf19.3330.3	--	0.440083	M	0.310197	A	0.762531	M	0.396947	P	0.113565	A	0.410844	M	-1.10867	-2.73145	-1.85601	0.251064	A	0.13519	A	0.25194	M	0.160746	A	0.169839	A	0.255988	P	-1.56187	1.2563	1.01607	0.182004	P	0.133518	P	0.338403	P	0.112934	P	0.0661323	P	0.0513514	A	-1.61159	-2.01895	-6.58995
PRC3	orf19.2474	--	7.66787	P	6.38084	P	5.18242	P	4.11527	P	4.25447	P	3.41476	P	-1.86327	-1.4998	-1.51765	5.96974	P	3.9409	P	3.33194	P	3.18561	P	4.33309	P	4.99775	P	-1.87397	1.09952	1.49995	0.831288	P	0.78453	P	1.31432	P	1.1612	P	1.31162	P	0.925676	P	1.39686	1.67186	-1.41985
PRP9	orf19.3178	--	0.24845	P	0.146806	P	0.175842	A	0.159542	P	0.165089	P	0.230296	P	-1.55727	1.12454	1.30968	0.233097	P	0.227582	P	0.2	P	0.0728242	A	0.104685	M	0.11976	A	-3.20082	-2.17396	-1.67	0.355828	P	0.321363	P	0.500634	P	0.312741	P	0.317635	P	0.205405	P	-1.13777	-1.01174	-2.4373
PST2	orf19.5285	--	1.65393	P	1.12654	P	1.23747	P	0.871756	P	0.902208	P	0.5545	P	-1.89724	-1.24864	-2.23169	0.690307	P	0.889946	P	0.677612	P	0.40675	P	0.443997	P	0.376871	P	-1.69713	-2.0044	-1.79799	0.433538	P	0.541436	P	0.406844	P	0.340734	P	0.317635	P	0.321622	P	-1.27237	-1.70459	-1.26498
PUT2	orf19.3974	1-Pyrroline-5-carboxylate dehydrogenase activity	8.02428	P	9.05344	P	10.0025	P	5.82977	P	13.3449	P	10.8072	P	-1.37643	1.47401	1.08045	17.8312	P	13.1681	P	18.3087	P	11.8708	P	7.93814	P	10.2028	P	-1.50211	-1.65884	-1.79447	3.76483	P	3.26059	P	3.84664	P	4.12162	P	3.24649	P	2.08108	P	1.09477	-1.00434	-1.84839
RBT2	orf19.1415	Ferric-chelate reductase activity	0.852273	P	1.32248	P	1.44289	P	0.43626	P	0.607781	P	0.539687	P	-1.98492	-2.22545	-2.83094	0.880851	P	0.822351	P	0.920299	P	0.323046	P	0.266288	P	0.367328	P	-2.75768	-3.10875	-2.56597	1.76636	P	1.22974	P	2.17047	P	0.416023	P	0.376753	P	0.547297	P	-4.28494	-3.24231	-3.21063
RDH54	orf19.5367	DNA topoisomerase activity	0.809401	P	0.92629	P	0.886606	P	0.531298	P	0.602524	P	0.534936	P	-1.52344	-1.53735	-1.65741	0.745626	P	0.602921	P	0.528955	P	0.367673	P	0.476574	P	0.678518	P	-2.02796	-1.26512	1.28275	0.327198	P	0.345304	P	0.512041	P	0.527992	P	0.350701	P	0.571622	P	1.61368	1.01563	1.11636
RNR2	orf19.5845	Ribonucleoside-diphosphate reductase activity	0.198864	A	0.128378	A	0.193919	A	0.080916	A	0.0946372	A	0.098379	A	-2.45765	-1.35653	-1.97115	0.123404	A	0.151834	A	0.125373	A	0.162966	A	0.130673	A	0.0632485	A	1.32059	-1.16194	-1.98223	0.349693	P	0.253223	P	0.657795	M	0.149614	P	0.166333	P	0.171622	A	-2.3373	-1.52239	-3.83282
RNR22	orf19.1868	Ribonucleoside-diphosphate reductase activity	21.6581	P	6.4438	P	3.94248	P	7.27748	P	2.95163	P	1.17664	P	-2.97475	-2.1815	-3.32265	11.4395	P	4.50679	P	2.86716	P	5.13544	P	6.15428	P	2.24027	P	-2.16545	1.36401	-1.29686	0.144683	A	0.737569	P	0.206591	A	0.411197	P	0.797595	P	0.197973	A	2.81129	1.07745	-1.20334
ROM2	orf19.906	Rho-guanyl-nucleotide exchange factor activity	2.23089	P	2.51351	P	2.91947	P	2.3916	P	3.43954	P	2.32197	P	1.07204	1.36842	-1.25733	2.97352	P	2.5788	P	3.31642	P	1.99378	P	1.66032	P	1.55539	P	-1.4914	-1.5532	-2.13221	3.20859	P	3.09669	P	2.98352	P	3.08301	P	2.92685	P	1.33514	P	-1.04073	-1.05803	-2.23462
RTA2	orf19.24	Phospholipid-translocating ATPase activity	10.0243	P	13.8876	P	11.7108	P	5.07786	P	7.21136	P	6.93292	P	-1.97411	-1.92579	-1.68915	14.6076	P	13.6382	P	14.3116	P	12.0382	P	12.7152	P	12.5434	P	-1.21344	-1.07259	-1.14097	10.2096	P	4.26335	P	4.97719	P	3.88707	P	2.61924	P	3.75811	P	-2.62656	-1.62771	-1.32439
RTA3	orf19.23	Phospholipid-translocating ATPase activity	0.630682	P	0.652334	P	0.649137	P	0.208397	P	0.3102	P	0.438793	P	-3.02635	-2.10295	-1.47937	0.377305	P	0.34341	P	0.231045	P	0.388544	P	0.497072	P	0.526198	P	1.02979	1.44746	2.27747	0.529652	P	0.302026	P	0.586819	P	0.251931	P	0.207415	P	0.389189	P	-2.10237	-1.45614	-1.5078
SAP7	orf19.756	Aspartic-type endopeptidase activity	3.03642	P	3.918	P	3.55834	P	2.89008	P	3.02576	P	3.27865	P	-1.04992	-1.31177	-1.08349	1.90756	P	1.46162	P	1.37821	P	0.644538	P	0.673865	P	0.722305	P	-2.96144	-2.15853	-1.80318	0.765849	P	0.500921	P	0.858048	A	0.36583	P	0.334168	P	0.37027	A	-2.05381	-1.57151	-2.37799
SEO2	orf19.700	Transporter activity	1.79855	P	2.35319	P	3.46261	P	0.971756	P	1.17876	P	2.14366	P	-1.85083	-1.99633	-1.61528	1.96998	P	2.72886	P	2.58164	P	0.921847	P	0.981973	P	0.962762	P	-2.31871	-2.83685	-2.70928	3.17638	P	2.78545	P	2.52091	P	1.4778	P	1.32214	P	0.92973	A	-2.13726	-2.53693	-2.77422
SER2	orf19.5838	Phosphoserine phosphatase activity	4.21539	P	2.82371	P	3.66393	P	2.0687	P	1.204	P	2.19676	P	-2.0377	-2.34528	-1.66788	5.4922	P	5.30537	P	5.81433	P	6.07771	P	5.34883	P	5.5857	P	1.10661	1.00819	-1.04093	8.20603	P	6.99586	P	13.3384	P	3.90975	P	4.28407	P	4.13311	P	-2.09901	-1.63512	-3.40176
SFT2	orf19.2342	--	13.5935	P	11.0301	P	8.87674	P	7.46794	P	6.91588	P	5.14086	P	-1.82025	-1.59489	-1.7267	18.7948	P	14.3702	P	8.84597	P	6.12567	P	11.4378	P	9.40606	P	-3.0682	-1.25638	1.06332	2.9182	P	3.87753	P	2.38657	P	2.87934	P	3.04208	P	2.77162	P	-1.0135	-1.27463	1.16134
SHM2	orf19.5750	Glycine hydroxymethyltransferase activity	29.1036	P	20.9066	P	20.9984	P	14.1653	P	10.1057	P	11.7848	P	-2.05237	-2.04393	-1.7882	27.8305	P	21.7862	P	17.3245	P	15.4549	P	17.7608	P	16.1439	P	-1.8027	-1.22664	-1.05529	23.1232	P	17.8826	P	19.4176	P	10.6211	P	11.756	P	19.7595	P	-2.20398	-1.53774	1.05846
SKN1.3	orf19.7362	--	0.817149	M	1.67076	P	1.72062	P	1.11756	P	1.51104	P	2.58971	P	1.36763	-1.1057	1.5051	1.65248	P	2.10496	P	2.23761	P	0.812167	P	0.97511	P	0.865644	M	-2.03466	-2.15869	-2.58491	1.52352	P	1.0488	P	1.88086	P	1.23359	P	0.97495	P	0.972973	P	-1.23503	-1.07575	-1.93311
SMF3	orf19.5022	Manganese ion transporter activity	13.7252	P	16.5666	P	14.5789	P	10.0565	P	13.4117	P	8.35439	P	-1.32142	-1.35002	-1.64411	5.34279	P	5.92595	P	9.15045	P	3.61812	P	3.74707	P	4.85086	P	-1.46913	-1.53543	-2.13377	4.09765	P	4.15332	P	7.39987	P	3.65154	P	3.6007	P	5.63243	P	-1.07771	-1.16908	1.21726
SMP3	orf19.5792	Alpha-1,2-mannosyltransferase activity	2.21539	P	2.95147	P	2.8143	P	1.66183	P	2.26604	P	3.01565	P	-1.3331	-1.30248	1.07155	4.6279	P	5.17629	P	4.80358	P	2.71758	P	3.4989	P	2.2515	P	-1.70294	-1.4794	-2.13351	1.46012	P	1.06538	P	1.62991	P	1.39093	P	1.33066	P	2.17297	P	-1.04975	1.249	1.33318
SOU1	orf19.2896	2,4-dienoyl-CoA reductase (NADPH) activity	11.7624	P	9.43366	P	9.447	P	3.72824	P	4.16719	P	3.98155	P	-3.15494	-2.26379	-2.37269	2.15816	P	1.75221	P	1.68448	P	0.241785	P	0.270681	P	0.216504	A	-9.24496	-6.61441	-8.4744	1.05419	P	0.755065	P	0.595691	P	0.498069	P	0.609218	P	0.510811	P	-2.11656	-1.2394	-1.16617
SSU1	orf19.7313	Sulfite transporter activity	1.41477	P	1.4742	P	1.54807	P	1.33969	P	1.57939	P	1.64729	P	-1.05604	1.07135	1.06409	1.79149	P	1.84749	P	1.52955	P	1.19982	P	1.25842	P	1.10067	P	-1.49313	-1.4681	-1.38965	0.91002	P	0.780847	P	1.41191	P	0.547297	P	0.466934	P	0.954054	P	-1.66275	-1.67229	-1.47991
SSY1	orf19.814	Amino acid binding	6.94215	P	4.96683	P	2.89565	P	3.5458	P	3.35857	P	1.40861	P	-1.95785	-1.47885	-2.05568	7.92624	P	5.19667	P	2.02209	P	3.7238	P	6.26208	P	3.27433	P	-2.12854	1.20502	1.61928	1.19018	P	1.75783	P	1.15463	P	1.11197	P	1.33066	P	0.627027	P	-1.07034	-1.32102	-1.84143
STL1	orf19.5753	Glucose transporter activity	1.97882	P	4.15909	P	5.73952	P	1.1771	P	2.65405	P	3.3488	P	-1.6811	-1.56707	-1.71391	3.8052	P	4.4499	P	6.48239	P	0.851021	P	0.508602	P	0.594686	P	-4.47636	-8.74353	-10.7675	5.78937	P	3.75506	P	4.74271	P	3.42375	P	3.34369	P	6.51487	P	-1.69095	-1.12303	1.37366
SUL1	orf19.2738	Sulfate transporter activity	0.479339	P	0.498157	P	0.732128	P	0.19313	P	0.28286	P	0.259922	P	-2.48195	-1.76114	-2.81673	2.28416	P	1.30316	P	1.93612	P	0.136323	P	0.234993	P	0.244948	P	-17.9103	-5.99371	-8.07385	0.156442	P	0.104052	P	0.404309	A	0.108108	P	0.0991984	P	0.263514	A	-1.44709	-1.04892	-1.5343
SUN42	orf19.5032	--	41.468	P	45.7248	P	50.447	P	28.2428	P	30.939	P	31.8189	P	-1.46827	-1.4779	-1.58544	40.0567	P	31.2011	P	37.157	P	21.2758	P	23.5802	P	19.5052	P	-1.88274	-1.32319	-1.90498	18.2249	P	14.1077	P	13.3853	P	15.2056	P	15.5481	P	14.9068	P	-1.19857	1.1021	1.11367
TAF25	orf19.3242	General RNA polymerase II transcription factor activity	1.0124	P	0.938575	P	1.1668	P	0.88855	P	0.82755	P	0.917272	P	-1.13938	-1.13416	-1.27204	0.686525	P	0.719769	P	0.77791	P	0.453819	P	0.460835	P	0.477545	P	-1.51277	-1.56188	-1.62898	1.93558	P	1.8895	P	4.35615	P	1.78764	P	1.64228	P	2.28784	P	-1.08276	-1.15053	-1.90405
Tca5b	orf19.2428.2	--	0.0495868	A	0.0337838	A	0.176664	A	0.021374	A	0.138801	A	0.177194	A	-2.31995	4.10852	1.003	0.193381	A	0.0451766	A	0.187463	A	0.119449	A	0.0827233	A	0.108907	A	-1.61893	1.83111	-1.72131	0.856851	P	0.653775	P	1.07985	P	0.381274	P	0.373748	P	0.62027	P	-2.24734	-1.74924	-1.74093
TES12	orf19.4122	--	0.793388	P	0.879914	P	1.06779	P	0.751527	P	0.774448	P	1.36864	P	1.62311	1.13338	1.45254	1.19196	P	1.18937	P	1.53343	P	0.609458	M	0.690337	P	0.8125	P	-2.20248	-1.84688	-1.92819	1.18865	P	0.982505	P	1.71863	P	1.09073	P	0.909319	P	1.45541	P	1.04011	-1.08453	-1.2588
TPK2	orf19.2277	cAMP-dependent protein kinase activity	4.89204	P	3.49939	P	3.26541	P	2.39771	P	2.2734	P	1.43041	P	-2.0403	-1.53928	-2.28285	2.75839	P	2.81861	P	2.40657	P	1.86234	P	2.04429	P	2.45397	P	-1.48114	-1.37877	1.0197	1.51227	P	1.77532	P	2.09886	P	1.21332	P	1.67134	P	1.37297	P	-1.24639	-1.06221	-1.5287
UGA12.3f	orf19.802	4-aminobutyrate transaminase activity	3.67614	P	3.36056	P	3.14626	P	3.49847	P	1.91167	P	2.97149	P	-1.05078	-1.75792	-1.05882	5.20946	P	4.52853	P	3.9397	P	3.19805	P	2.75842	P	2.37126	P	-1.62895	-1.64171	-1.66144	1.20245	P	0.775322	P	1.64259	P	0.983591	P	1.001	P	0.860811	P	-1.22251	1.29108	-1.90818
UGA12.5f	orf19.802	4-aminobutyrate transaminase activity	3.57335	P	3.6769	P	3.66146	P	3.55878	P	3.49001	P	3.32588	P	-1.00409	-1.05355	-1.1009	3.08416	P	3.43478	P	3.58328	P	1.87567	P	1.81991	P	1.26534	P	-1.6443	-1.88733	-2.83186	0.810838	P	0.696133	P	1.36248	A	0.795367	P	0.687375	P	0.952703	A	-1.01945	-1.01274	-1.43013
VCX1	orf19.405	Calcium ion transporter activity	25.5398	P	24.0491	P	23.3048	P	12.3725	P	14.2029	P	13.886	P	-2.06423	-1.69325	-1.6783	20.2548	P	16.0275	P	14.3899	P	9.84192	P	12.5286	P	11.7388	P	-2.05802	-1.27928	-1.22584	5.00818	P	3.86004	P	8.37389	P	4.59749	P	3.99198	P	4.67297	P	-1.08933	1.03418	-1.79198
VPS184	orf19.5543	Protein binding	0.142045	A	0.298526	M	0.823336	M	0.719847	P	0.433228	A	0.291224	A	5.06773	1.45123	-2.82716	0.0510638	A	0.0197011	A	0.038806	A	0.0279751	A	0.0219619	A	0.0306886	A	-1.82533	1.11476	-1.26451	0.547035	P	0.501842	P	0.939163	P	0.344595	P	0.323647	P	0.405405	A	-1.58747	-1.55058	-2.3166
YHM1	orf19.685	Transporter activity	10.4672	P	11.5307	P	12.1923	P	7.50534	P	9.3654	P	10.2513	P	-1.39628	-1.20902	-1.16231	19.6499	P	16.08	P	20.9496	P	10.4054	P	9.78862	P	10.8408	P	-1.81634	-1.70021	-2.01746	10.3277	P	8.60267	P	15.7421	P	9.47249	P	9.86824	P	20.2149	P	-1.09477	1.14169	1.38763
YOR100	orf19.2599	Carnitine:acyl carnitine antiporter activity	10.5573	P	14.0301	P	13.046	P	7.63969	P	11.7834	P	12.7753	P	-1.38191	-1.19067	-1.02119	12.5428	P	11.4552	P	11.4991	P	5.33082	P	6.2683	P	5.8387	P	-2.35288	-1.82747	-1.96946	3.37014	P	3.66943	P	4.60076	P	2.65251	P	2.21443	P	3.33784	P	-1.27055	-1.65705	-1.37837
ZRT2	orf19.1585	Low affinity zinc ion transporter activity	40.0294	P	30.6603	P	38.5703	P	20.3901	P	15.1409	P	16.5204	P	-1.96318	-2.025	-2.3347	37.6719	P	20.001	P	19.7713	P	11.4338	P	16.1098	P	15.6624	P	-3.29477	-1.24154	-1.26234	3.22188	P	3.28821	P	1.84537	P	3.44015	P	4.09619	P	2.67297	P	1.06775	1.24572	1.44847
