# Supplementary material for: The Transcription Factor Mrr1p Controls Expression of the MDR1 Efflux Pump and Mediates Multidrug Resistance in Candida albicans
Source: PLOS journal article supplement (doi:10.1371/journal.ppat.0030164), 2007-10-29
Supplement: S4 (10.1371/journal.ppat.0030164.s004) [file journal.ppat.0030164.st004.xls]

## Sheet: 189 KO Down
Microarray Probe Name	orf19 Name	GO Annotation (Molecular Function)	F5-1	Flags	F5-2	Flags	F5A-1	Flags	F5A-2	Flags	F5B-1	Flags	F5B-2	Flags	F5Δmrr1-A1 vs. F5-1	F5Δmrr1-A2 vs. F5-2	F5Δmrr1-B1 vs. F5-1	F5Δmrr1-B2 vs. F5-2	G5-1	Flags	G5-2	Flags	G5A-1	Flags	G5A-2	Flags	G5B-1	Flags	G5B-2	Flags	G5Δmrr1-A1 vs. G5-1	G5Δmrr1-A2 vs. G5-2	G5Δmrr1-B1 vs. G5-1	G5Δmrr1-B2 vs. G5-2
AAF1	orf19.7436	--	1.75416	P	4.3018	P	0.50227	P	1.15413	P	0.792711	P	1.46354	P	-3.51097	-3.74996	-2.21719	-2.92152	1.832	P	1.36898	P	0.32931	P	0.719348	P	0.399713	P	0.837176	P	-5.56343	-1.91591	-4.33978	-1.79174
ACO1	orf19.6385	Aconitate hydratase activity	32.889	P	42.607	P	36.2531	P	24.2737	P	34.4624	P	22.2164	P	1.10229	-1.75527	1.04784	-1.91781	57.152	P	35.6938	P	20.8103	P	23.9291	P	14.735	P	10.915	P	-2.74633	-1.49165	-1.9825	-1.73766
AKL1	orf19.5357	Protein serine/threonine kinase activity	0.596005	P	1.50676	P	0.363224	P	0.837238	P	0.363326	P	0.899305	P	-1.64088	-1.79968	-1.64041	-1.67547	1.004	P	1.15642	P	0.618391	P	0.595051	P	0.620344	P	0.789625	P	-1.62357	-1.94339	-1.61846	-1.46451
ALS7	orf19.7400	Carbohydrate binding	0.752497	P	0.781532	P	0.511918	P	0.37238	P	0.382688	P	0.444444	P	-1.46996	-2.09875	-1.86574	-1.84657	1.06667	P	1.01136	P	1.31092	P	0.913386	P	1.42837	P	0.865274	P	1.23599	-1.07673	1.34555	-1.14121
AMYG1	orf19.4899	Alpha-glucosidase activity	2.64484	P	4.4786	P	0.696935	P	2.35512	P	0.561503	P	2.6331	P	-3.79496	-1.90165	-4.71028	-1.70089	0.981333	P	1.36765	P	1.04368	P	0.816648	P	1.06734	P	2.30259	P	1.06353	-1.67471	1.08764	1.68362
ARD8	orf19.6322	2,4-dienoyl-CoA reductase (NADPH) activity	4.23751	P	9.52477	P	2.68331	P	2.86436	P	2.65262	P	3.87442	P	-1.57921	-3.32527	-1.6829	-2.44208	6.55533	P	8.40575	P	2.09828	P	3.68166	P	3.05158	P	5.91499	P	-3.14023	-2.25974	-2.24889	-1.6965
BFR2	orf19.7624	--	0.261931	P	0.316441	P	0.393871	P	0.0517879	A	0.511389	P	0.127315	P	1.63759	-4.83133	2.08195	-2.45703	0.428667	P	0.299465	P	0.178161	P	0.17604	P	0.194842	A	0.146254	A	-2.35785	-1.67247	-2.01178	-2.20664
CDC1	orf19.3083	--	0.81687	P	1.68919	P	0.903519	P	0.815043	P	0.389522	P	0.943287	P	1.10607	-2.07252	-2.09711	-1.79075	0.717333	P	0.775401	P	0.302299	P	0.499438	P	0.277937	M	0.322767	P	-2.37293	-1.55255	-2.58092	-2.40236
CDR11.5f	orf19.918	ATP binding	0.45172	P	0.468468	P	0.0908059	P	0.536991	P	0.230638	P	0.444444	P	-4.94796	1.16135	-1.95864	-1.04804	1.07533	P	1.05481	P	0.551724	P	0.591114	P	0.419771	P	0.717579	P	-1.94896	-1.78686	-2.56013	-1.48859
CDR3.5eoc	orf19.1313	ATP binding	0.762486	P	0.73536	P	0.229285	P	0.424168	A	0.379271	P	0.418981	P	-3.3255	-1.73365	-2.0104	-1.75511	0.357333	P	0.17246	P	0.355172	P	0.231721	P	0.265043	P	0.619597	A	-1.00608	1.34362	-1.34821	3.5927
CHO2	orf19.169	Methylene-fatty-acyl-phospholipid synthase activity	3.08435	P	1.3277	P	2.55619	P	0.860666	P	2.56948	P	0.722222	P	-1.20662	-1.54265	-1.20038	-1.83836	3.86133	P	1.88503	P	1.04828	P	1.26884	P	1.89255	P	0.587896	P	-3.68351	-1.48563	-2.04028	-3.20639
CHS3.5f	orf19.4937	Chitin synthase activity	0.256382	P	0.301802	P	0.01	A	0.0369914	A	0.111617	A	0.144676	A	-25.6382	-8.15871	-2.29697	-2.08605	0.556	P	0.0347594	A	0.11954	A	0.195726	P	0.239255	P	0.481268	M	-4.65115	5.63087	-2.32388	13.8457
CHS4	orf19.7349	Enzyme activator activity	1.58491	P	1.54842	P	0.797957	P	0.538841	P	0.896355	P	1.06366	P	-1.9862	-2.87362	-1.76817	-1.45575	1.416	P	0.609626	P	0.829885	P	0.626547	P	0.620344	P	0.397695	P	-1.70626	1.02776	-2.28261	-1.5329
CLN21	orf19.6028	Cyclin-dependent protein kinase regulator activity	0.688124	P	1.90653	P	0.0476731	A	0.217016	A	0.430524	A	0.417824	P	-14.4342	-8.78521	-1.59834	-4.563	0.125333	A	0.0106952	A	0.016092	A	0.0551181	A	0.106017	A	0.0389049	A	-7.78857	5.15354	-1.1822	3.63761
CNH1.3f	orf19.367	Cation:cation antiporter activity	1.09101	P	1.68468	P	0.582293	P	0.848335	P	0.390661	P	0.921296	P	-1.87365	-1.98587	-2.79273	-1.8286	0.816	P	0.537433	P	0.381609	P	0.438695	P	0.501433	P	0.829971	P	-2.13831	-1.22507	-1.62734	1.54432
CNH1.5f	orf19.367	Cation:cation antiporter activity	0.475028	P	0.798423	P	0.144154	A	0.324291	A	0.0444191	A	0.25463	A	-3.29527	-2.46206	-10.6942	-3.13563	0.546667	A	0.505348	P	0.208046	A	0.248594	P	0.2851	P	0.827089	P	-2.62762	-2.03282	-1.91745	1.63667
CPH1	orf19.4433	Transcription factor activity	1.14428	P	1.84234	P	0.583428	P	0.604192	A	0.620729	M	0.943287	P	-1.96131	-3.04926	-1.84345	-1.95311	1.19067	P	0.569519	P	0.352874	P	0.291339	A	0.464183	A	0.923631	M	-3.3742	-1.95483	-2.56508	1.62177
CTR1	orf19.3646	Copper ion binding	10.6204	P	23.5462	P	7.93984	P	10.6782	P	7.67084	P	14.0324	P	-1.33761	-2.20507	-1.38452	-1.67799	15.4653	P	15.5321	P	5.48851	P	9.93251	P	6.22565	P	7.00072	P	-2.81777	-1.56376	-1.69624	-1.7404
DHH1	orf19.6197	Protein binding	4.14095	P	5.01126	P	1.41998	P	2.77559	P	2.61162	P	3.27083	P	-2.91621	-1.80548	-1.51122	-1.62265	4.592	P	3.09893	P	3.28506	P	3.20023	P	2.65329	P	4.29251	P	-1.39784	1.03269	-1.73068	1.38516
DLD3	orf19.5805	D-lactate dehydrogenase (cytochrome) activity	0.937847	P	2.01914	P	0.492622	P	0.495684	P	0.27164	P	0.523727	P	-1.90379	-4.07345	-2.77735	-2.53379	0.931333	P	1.03075	P	1.25	P	0.868954	P	0.824499	P	1.15634	P	1.31013	-1.10409	-1.08567	1.05677
DNA2	orf19.1192	ATP-dependent DNA helicase activity	0.694784	P	1.31869	P	0.265607	P	0.611591	P	0.422551	P	0.900463	P	-2.61583	-2.15617	-1.64426	-1.46446	0.650667	P	0.552139	P	0.318391	P	0.496063	P	0.459885	P	0.442363	P	-2.04361	-1.11304	-1.41485	-1.24816
DRS1	orf19.7635	ATP-dependent RNA helicase activity	0.352386	P	0.413851	P	0.371737	P	0.189273	A	0.385535	P	0.160301	M	1.03965	-2.15868	1.11623	-2.59628	0.379333	P	0.36631	P	0.155747	P	0.183915	P	0.118195	P	0.121037	A	-2.38214	-1.84841	-3.22489	-2.39511
DRS23	orf19.323	Phospholipid-translocating ATPase activity	1.4889	P	1.76351	P	0.908627	P	0.623305	A	0.600228	P	0.674768	P	-1.60472	-2.76768	-1.57913	-2.08613	1.372	P	0.885027	P	0.625287	P	0.825647	P	1.11175	P	1.00144	P	-2.19419	-1.07192	-1.23409	1.13154
EBP4	orf19.3433	NADPH dehydrogenase activity	5.70033	P	15.3435	P	2.20204	P	9.52281	P	3.55923	P	8.27083	P	-2.58866	-1.61123	-1.60157	-1.85513	6.072	P	12.9826	P	4.73218	P	6.08886	P	5.24928	P	12.9597	P	-1.28313	-2.13219	-1.15673	-1.00177
EFG1	orf19.610	Transcription factor activity	9.90566	P	8.98086	P	4.51419	P	3.08138	P	5.3508	P	6.06134	P	-2.19434	-2.91456	-1.85125	-1.48166	11.696	P	4.80615	P	3.05747	P	2.14961	P	5.00287	P	6.02738	P	-3.82538	-2.23583	-2.33786	1.2541
FAS2.53f	orf19.5949	3-oxoacyl-[acyl-carrier-protein] reducatase activity	2.06215	P	3.0411	P	0.118048	P	2.49877	P	1.37244	P	3.69502	P	-16.9531	-1.23316	-1.40513	1.21539	6.31667	P	6.05882	P	2.05402	P	3.11417	P	2.30874	P	3.45605	P	-2.86804	-1.95263	-2.65752	-1.78722
FRE30.3	orf19.6139	Ferric-chelate reductase activity	3.12042	P	6.87613	P	1.71112	P	1.22626	P	1.72665	P	1.8287	P	-1.80996	-5.47962	-1.78222	-3.78212	2.37333	P	2.02941	P	0.545977	P	1.07762	P	1.19986	P	1.22983	P	-4.34695	-1.88324	-2.95055	-2.48767
FRE30.53	orf19.6140	Ferric-chelate reductase activity	1.39345	P	2.57601	P	0.242338	P	0.647349	P	0.609909	P	0.770833	P	-4.99786	-4.25136	-2.08299	-2.49955	1.83467	P	1.07353	P	0.390805	P	0.575366	P	0.555158	A	0.677954	A	-4.33309	-1.74537	-3.38502	-1.68426
FRE7	orf19.7077	Ferric-chelate reductase activity	0.380688	P	0.885135	P	0.254257	P	0.399507	A	0.170843	A	0.188079	P	-1.49726	-2.21557	-1.81844	-3.28339	1.2	P	0.831551	P	0.4	P	0.525309	P	0.65616	P	0.693083	P	-3	-1.58297	-2.38966	-1.67816
GAC1	orf19.7053	Protein phosphatase type 1 activity	0.478357	P	1.55293	P	0.324631	P	0.409371	A	0.308656	P	0.474537	P	-1.47354	-3.79345	-1.54981	-3.27251	1.05333	P	0.402406	P	0.268966	P	0.275591	P	0.219198	P	0.335735	A	-3.91624	-1.46016	-4.8054	-1.19858
GAL1	orf19.3670	Galactokinase activity	1.17314	P	0.88964	P	0.795687	P	0.578298	P	0.0398633	A	0.0729167	A	-1.47438	-1.53837	-20.3804	-4.44788	1.388	P	1.08422	P	1.35862	P	1.51969	P	1.10602	P	0.815562	P	-1.02162	1.40163	-1.25495	-1.32942
GAP6	orf19.6659	Amino acid permease activity	5.90955	P	5.22072	P	3.32633	P	2.04994	P	3.77107	P	2.0353	P	-1.8122	-2.44757	-1.57775	-2.36573	4.97267	P	4.68315	P	2.54483	P	2.53543	P	2.34814	P	2.25216	P	-1.96727	-1.87045	-1.46102	-1.52735
GDH2	orf19.2192	Glutamate dehydrogenase activity	12.6193	P	15.4437	P	8.21339	P	5.93711	P	7.08884	P	5.24537	P	-1.53643	-2.60121	-1.78017	-2.94425	16.1667	P	15.2393	P	15.2529	P	15.4567	P	16.4255	P	13.1182	P	-1.05991	1.01426	1.01601	-1.1617
GPX1	orf19.86	Glutathione peroxidase activity	16.5194	P	12.4324	P	6.07208	P	11.8594	P	10.5051	P	8.83623	P	-2.82489	-1.07943	-1.60033	-1.41484	23.6373	P	24.4913	P	12.0247	P	12.1631	P	22.3768	P	19.1326	P	-1.77009	-2.01507	-1.5721	-1.68533
GRP2	orf19.4309	Oxidoreductase activity	36.4373	P	38.5597	P	17.4438	P	20.3453	P	20.5461	P	22.9931	P	-2.08884	-1.89527	-1.84694	-1.82996	57.33	P	53.3944	P	15.3557	P	14.2705	P	16.3711	P	18.0382	P	-3.72209	-3.67261	-3.45016	-2.92867
GTS1	orf19.6393	Specific RNA polymerase II transcription factor activity	0.310766	P	0.798423	P	0.128263	A	0.47349	A	0.167426	A	0.458333	P	-2.42287	-1.68625	-1.85614	-1.74201	0.412	A	0.509358	P	0.27931	P	0.553431	P	0.296562	M	0.59366	A	-1.47506	1.08653	-1.38926	1.16551
GUT1	orf19.558	Glycerol kinase activity	0.841288	P	1.26689	P	0.427923	P	0.362515	A	0.512528	P	0.334491	A	-1.96598	-3.49473	-1.64145	-3.78752	1.29733	P	0.566845	P	0.265517	A	0.294713	A	0.426934	M	0.886167	A	-4.88606	-1.92338	-3.03872	1.56333
HEM12	orf19.5369	Uroporphyrinogen decarboxylase activity	3.28524	P	7.51577	P	1.61067	P	4.41554	P	1.96469	P	4.68056	P	-2.03967	-1.70212	-1.67214	-1.60574	8.01733	P	7.76337	P	5.10345	P	6.72216	P	6.47851	P	10.732	P	-1.57096	-1.15489	-1.23753	1.38239
HGT11	orf19.4527	Glucose transporter activity	4.91639	P	10.8502	P	1.19523	P	0.984381	A	1.25664	P	3.75424	P	-4.09315	-9.45667	-3.94738	-2.73936	4.83022	P	2.76827	P	0.537931	P	0.851144	P	0.847182	A	0.479347	A	-8.46123	-3.0919	-5.66027	-6.30198
HGT12	orf19.3668	Glucose transporter activity	0.635405	P	0.959459	P	0.1521	P	0.379778	A	0.144077	A	0.415509	P	-4.17609	-2.34934	-4.37617	-2.19656	2.05	P	0.838904	P	0.164943	A	0.151856	A	0.31447	A	0.196686	A	-12.415	-5.59452	-6.52387	-4.22572
HIK1.5eoc	orf19.5181	Osmosensor activity	0.837958	P	1.60698	P	0.103292	P	0.74106	P	0.374715	P	0.820023	P	-8.11254	-2.16849	-2.05644	-1.77257	2.134	P	1.23997	P	0.597126	P	0.864454	P	0.881089	P	2.40778	P	-3.69036	-1.46221	-2.54268	1.89889
HSP78.5f	orf19.882	ATP-dependent peptidase activity	0.220866	P	0.171171	A	0.15891	P	0.220715	P	0.154897	P	0.243056	P	-1.38988	1.28944	-1.42588	1.41996	0.345333	P	0.339572	P	0.224138	P	0.224972	P	0.209169	P	0.210375	P	-1.54072	-1.5094	-1.65098	-1.61413
IFA17.5f	orf19.4511	--	0.295228	P	0.309685	M	0.0783201	A	0.11344	A	0.148064	A	0.18287	P	-3.7695	-2.72994	-1.99392	-1.69347	0.230667	A	0.0842246	A	0.103448	M	0.15748	P	0.12894	A	0.108069	A	-2.22978	1.86977	-1.78895	1.28311
IFD1	orf19.1048	Aryl-alcohol dehydrogenase activity	49.2786	P	67.6149	P	14.849	P	32.0598	P	18.6834	P	25.9352	P	-3.30566	-2.08172	-2.6238	-2.58559	78.088	P	63.621	P	12.896	P	12.3695	P	17.5057	P	22.2024	P	-6.08067	-5.15015	-4.48374	-2.87009
IFD2	orf19.771	Aryl-alcohol dehydrogenase activity	11.6509	P	9.15484	P	2.76901	P	3.80271	P	3.13895	P	4.36053	P	-4.21452	-2.3311	-3.83344	-2.02696	6.274	P	12.6671	P	3.21207	P	3.11192	P	3.86461	P	3.59366	P	-1.97274	-4.13292	-1.62703	-3.37579
IFD4	orf19.4477	Aryl-alcohol dehydrogenase activity	13.1731	P	13.4572	P	4.85698	P	2.94945	P	10.8776	P	14.809	P	-2.71221	-4.56262	-2.42555	-1.93855	37.5933	P	39.0495	P	10.1489	P	10.1772	P	11.3789	P	16.688	P	-3.99811	-4.39656	-3.44088	-2.86627
IFD5	orf19.1048	Aryl-alcohol dehydrogenase activity	22.7214	P	18.1903	P	1.51078	P	1.48829	P	1.4385	P	1.89005	P	-15.0395	-12.2223	-15.7953	-9.62427	73.5493	P	63.998	P	15.0241	P	15.0922	P	18.0996	P	23.8581	P	-4.91817	-4.24638	-4.10972	-2.68765
IFD6	orf19.4476	Aryl-alcohol dehydrogenase activity	28.798	P	26.9628	P	0.92168	A	0.644883	P	1.06606	P	1.26505	P	-31.2451	-41.8104	-27.0135	-21.3137	46.0853	P	53.4652	P	3.61264	P	2.41732	A	3.64613	P	0.684438	A	-12.7567	-22.1175	-12.6395	-78.1155
IFD7	orf19.629	Aryl-alcohol dehydrogenase activity	25.2814	P	20.6233	P	0.890465	P	1.87546	M	3.60421	P	3.14815	A	-10.5448	-4.25919	-5.81627	-5.99851	42.3907	P	34.2429	P	5.01456	P	4.90514	P	4.60984	P	6.57061	P	-8.01104	-8.15771	-9.58747	-6.53384
IFK3	orf19.857	--	0.438402	P	0.42455	P	0.240636	P	0.0480888	A	0.172551	P	0.0775463	A	-1.82185	-8.82845	-2.05127	-5.60334	0.382667	P	0.21123	P	0.183908	P	0.110236	P	0.194842	P	0.0360231	A	-2.08075	-1.91616	-1.96398	-5.86374
IMP2	orf19.1981	Peptidase activity	0.374029	P	0.390766	P	0.38252	P	0.506782	P	0.263098	P	0.37963	P	1.0227	1.29689	-1.42163	-1.02933	0.542667	P	0.598931	P	0.228736	P	0.373453	P	0.239255	P	0.214697	P	-2.37246	-1.60376	-1.81033	-2.07675
IPF10062	orf19.1086	--	2.35849	P	3.14302	P	1.22815	P	1.68187	P	1.59112	P	2.01736	P	-1.92036	-1.86876	-1.48229	-1.55798	2.66533	P	2.10294	P	1.3092	P	1.6243	P	1.76934	P	2.85014	P	-2.03586	-1.29468	-1.5064	1.35531
IPF11006	orf19.4658	--	0.426193	P	0.456081	P	0.289444	P	0.95931	P	0.497722	P	0.706018	P	-1.47246	2.10338	1.16783	1.54801	1.06	P	0.834225	P	0.504598	P	0.510686	P	0.468481	P	0.665706	P	-2.10068	-1.63354	-2.97141	-2.26838
IPF11090.exon1	orf19.4622	--	1.19645	P	2.42342	P	0.141884	P	1.82861	P	1.03531	P	2.77199	P	-8.43257	-1.32528	-1.15565	1.14383	2.16533	P	2.70588	P	0.898851	P	1.83577	P	1.02722	P	1.71758	P	-2.409	-1.47398	-2.10795	-1.5754
IPF11569	orf19.9	--	0.312986	P	0.288288	P	0.240636	P	0.0480888	A	0.364465	P	0.259259	P	-1.30066	-5.99492	1.16448	-1.11197	0.474667	P	0.379679	P	0.256322	P	0.197975	P	0.212034	P	0.146974	A	-1.85184	-1.91781	-2.23863	-2.58331
IPF11610	orf19.2146	H3/H4 histone acetyltransferase activity	1.18535	P	2.44032	P	0.761634	P	1.4254	P	0.757973	P	1.53877	P	-1.55632	-1.71202	-1.76903	-2.05234	1.54667	P	1.27607	P	0.939655	P	1.01237	P	0.829513	P	1.05836	P	-1.61897	-1.27671	-1.85243	-1.21362
IPF11694	orf19.4355	Nicotinamide mononucleotide permase activity	0.375139	P	0.564189	P	0.171396	P	0.361282	P	0.144647	P	0.190972	P	-2.18872	-1.56163	-2.59348	-2.9543	0.422667	P	0.315508	A	0.175862	A	0.167604	A	0.121776	A	0.81268	P	-2.4034	-1.88246	-3.47084	2.57578
IPF12105	orf19.5633	--	0.50222	P	0.717342	P	0.287741	P	0.316276	A	0.274487	P	0.340278	P	-1.79165	-2.28661	-1.57695	-1.84335	0.589333	P	0.311497	P	0.26092	P	0.147357	P	0.230659	P	0.43804	P	-2.25868	-2.1139	-2.555	1.40624
IPF12316	orf19.5069	--	0.258602	P	0.260135	A	0.103292	A	0.474723	P	0.150342	P	0.239583	P	-2.5036	1.82491	-1.72009	-1.08578	0.894667	P	0.856952	P	0.370115	P	0.401575	P	0.302292	P	0.386167	P	-2.41727	-2.13398	-2.95961	-2.21912
IPF12513	orf19.5605	--	1.06104	P	1.63401	P	0.399546	P	0.51418	P	0.915717	P	0.967593	P	-2.65562	-3.17789	-1.72856	-2.74571	1.65067	P	1.50735	P	1.24368	P	1.37964	P	1.33811	P	1.52594	P	-1.51837	-1.157	-1.23098	1.06663
IPF12606.5eoc	orf19.3288	--	1.77137	P	2.17005	P	1.20318	P	0.591862	P	1.05125	P	0.491898	P	-1.47224	-3.66647	-1.685	-4.41157	1.98533	P	0.772727	P	0.554023	P	0.566929	P	0.583095	P	0.652738	P	-3.58349	-1.363	-3.40482	-1.18382
IPF1264	orf19.7371	Transcription factor activity	1.81743	P	1.76295	P	0.993757	P	0.496301	A	1.23747	P	0.850694	A	-1.82838	-3.40473	-1.47112	-1.97863	1.984	P	0.563503	A	0.331609	M	0.448819	A	0.240688	A	0.590058	A	-6.06614	-1.35414	-8.21334	1.09656
IPF1292	orf19.7381	Transcription factor activity	2.23085	P	1.71396	P	1.25539	P	0.790382	P	1.15604	P	0.847222	P	-1.77702	-2.16853	-1.92974	-2.02304	0.504	P	0.23262	P	0.145977	P	0.195726	P	0.0959885	M	0.195965	M	-3.4526	-1.1885	-5.25063	-1.18705
IPF13042	orf19.2410	--	0.258602	P	0.273649	P	0.181612	P	0.310727	A	0.444191	P	0.429398	P	-1.42392	1.1355	1.71767	1.56916	0.408	P	0.319519	P	0.196552	P	0.204724	P	0.116046	P	0.15706	A	-2.07579	-1.56073	-3.51585	-2.03437
IPF13116	orf19.3463	--	0.556049	P	0.43018	P	0.640182	P	0.12947	A	0.699317	P	0.179398	P	1.1513	-3.32263	1.25765	-2.39791	0.358667	P	0.160428	M	0.102299	A	0.100112	A	0.160458	P	0.0590778	A	-3.50607	-1.60248	-2.23526	-2.71553
IPF13202	orf19.215	--	0.794673	P	1.53266	P	0.46538	P	0.94328	P	0.544419	P	0.81713	P	-1.70758	-1.62482	-1.45967	-1.87566	1.07467	P	0.668449	P	0.46092	P	0.592801	P	0.375358	P	1.07349	P	-2.33157	-1.12761	-2.86304	1.60594
IPF13361	orf19.2330	snoRNA binding	0.529412	P	0.372748	P	0.746879	P	0.350185	P	0.801253	P	0.347801	P	1.48773	-1.34974	1.71234	-1.22916	1.148	P	0.490642	P	0.224138	P	0.269404	P	0.332378	P	0.284582	P	-5.34749	-1.79899	-4.10207	-1.6681
IPF13383.53eoc	orf19.1840	--	3.23196	P	5.70777	P	0.866061	P	3.09679	P	3.01025	P	5.95949	P	-3.91824	-1.82203	-1.59942	-1.47656	3.72267	P	3.44652	P	2.71379	P	3.25534	P	2.48997	P	5.04755	P	-1.37176	-1.05873	-1.49506	1.46453
IPF13565	orf19.1609	--	0.116537	P	0.123874	P	0.0692395	P	0.0653514	A	0.0444191	A	0.0694444	M	-1.6831	-1.8955	-2.62358	-1.78378	0.02	A	0.0334225	A	0.0678161	A	0.0922385	P	0.0659026	A	0.106628	A	3.39081	2.75977	3.29513	3.19032
IPF13756.5f	orf19.4479	--	0.173141	P	0.153153	P	0.0499433	A	0.115906	A	0.283599	P	0.0925926	A	-3.46675	-1.32135	1.63797	-1.65405	0.324	P	0.15508	P	0.0494253	A	0.102362	P	0.0501433	A	0.0634006	A	-6.55535	-1.51501	-6.46149	-2.44604
IPF1382	orf19.6444	--	0.412875	P	0.77027	P	0.408627	P	0.591862	P	0.353075	P	0.393518	P	-1.0104	-1.30144	-1.16937	-1.95739	0.356	P	0.403743	P	0.156322	A	0.205849	P	0.216332	P	0.227666	A	-2.27735	-1.96135	-1.64562	-1.7734
IPF14888	orf19.4339	--	0.798002	P	0.467342	P	0.712826	P	0.374846	A	0.95672	P	0.375	P	-1.11949	-1.24676	1.19889	-1.24625	1.896	P	0.927808	P	0.367816	P	0.408324	P	0.45702	P	0.582133	P	-5.15475	-2.27223	-4.14861	-1.59381
IPF14895	orf19.93	--	7.29634	P	6.40541	P	8.50965	P	3.89889	P	6.22779	P	3.59722	P	1.16629	-1.64288	-1.17158	-1.78065	8.86667	P	5.07888	P	3.36092	P	3.20247	P	3.5745	P	0.172911	A	-2.63817	-1.58592	-2.48053	-29.3728
IPF15013	orf19.5626	--	9.24195	P	13.9234	P	5.45062	P	7.03576	P	4.77847	P	4.14005	P	-1.69558	-1.97895	-1.49149	-2.33394	5.51	P	3.92246	P	2.39138	P	2.83521	P	1.93195	P	1.51873	P	-1.87929	-1.37046	-2.38715	-2.82713
IPF15153	orf19.5867	--	3.50832	P	3.86149	P	1.79001	P	2.15536	P	1.20273	P	1.49306	P	-1.95995	-1.79157	-1.57614	-1.48586	1.44933	P	0.80615	P	1.31379	P	1.23622	P	1.16046	P	1.06628	P	-1.10317	1.53349	-1.24893	1.32269
IPF15183	orf19.1806	--	2.399	P	2.01408	P	1.14415	P	1.06042	A	0.798405	P	1.06019	P	-2.31382	-1.99475	-2.01289	-1.52425	1.50667	P	0.77139	A	1.21034	P	0.647919	P	1.30946	P	1.24063	P	-1.24482	-1.19057	-1.15061	1.60831
IPF15273	orf19.1822	Transcription factor activity	0.782464	P	3.06644	P	0.23723	P	0.241677	A	0.481777	P	0.934028	P	-3.29833	-12.6882	-1.62412	-3.28303	0.168	A	0.122995	A	0.124138	A	0.100112	A	0.146132	A	0.0302594	A	-1.35333	-1.22856	-1.14965	-4.06468
IPF15423	orf19.2108	Copper, zinc superoxide dismutase activity	0.302997	P	0.23536	P	0.254257	P	0.266338	P	0.156036	P	0.295139	P	-1.1917	1.13162	-1.94183	1.25399	0.829333	P	0.609626	P	0.357471	P	0.359955	P	0.335244	P	0.373199	A	-2.32	-1.69362	-2.47382	-1.63351
IPF1588	orf19.972	--	0.495006	P	0.727477	P	0.333712	P	0.408138	P	0.133257	A	0.201389	A	-1.48333	-1.78243	-2.46913	-2.11605	0.330667	A	0.215241	A	0.154023	A	0.0978628	A	0.215616	P	0.169308	A	-1.71195	-2.86763	-1.08105	-1.72486
IPF16	orf19.5984	--	2.2364	P	1.86374	P	2.27923	P	1.82491	P	1.38724	P	1.48264	P	1.01915	-1.02128	-1.61212	-1.25704	0.572	P	0.347594	P	0.241379	P	0.181102	P	1.03152	P	1.00288	P	-2.36971	-1.91932	-1.79929	-1.589
IPF16173.3f	orf19.4508	--	0.311876	P	0.345721	P	0.0805902	P	0.154131	A	0.175399	M	0.204861	P	-3.86989	-2.24304	-1.7781	-1.68759	0.044	A	0.0681818	A	0.0885057	P	0.0832396	P	0.126075	A	0.0302594	A	2.01149	1.22085	2.86533	-2.25325
IPF16189.5f	orf19.5576	--	0.136515	P	0.245495	P	0.129398	P	0.273736	M	0.16287	P	0.275463	P	-1.055	1.11504	1.19306	1.12207	0.521333	P	0.417112	P	0.164368	P	0.264342	P	0.32808	P	0.240634	P	-3.17175	-1.57793	-1.58904	-1.73339
IPF1634	orf19.6578	Inorganic phosphate transporter activity	7.47836	P	6.53266	P	4.97843	P	2.69914	P	3.46583	P	1.72396	P	-1.50215	-2.42028	-2.02529	-3.60773	6.79467	P	2.64439	P	1.34828	P	1.73678	P	1.67335	P	1.16427	P	-5.03952	-1.52258	-4.22223	-2.57241
IPF16981.exon2	orf19.2458	Transcription factor activity	2.08713	P	2.55293	P	1.07151	P	1.59679	P	1.10194	P	1.61111	P	-1.91526	-1.70854	-1.90908	-1.60092	1.74467	P	2.43382	P	2.90862	P	2.41057	P	1.65115	P	1.86744	P	1.74967	-1.00276	-1.12549	-1.42014
IPF17186	orf19.251	--	25.0416	P	29.3176	P	2.1958	P	2.75092	P	2.81492	P	4.62731	P	-10.9146	-11.0415	-8.66946	-6.18905	17.412	P	26.4084	P	3.18563	P	2.82565	P	3.08381	P	3.46974	P	-5.50948	-9.51228	-5.62395	-7.38102
IPF17914.3eoc	orf19.5124	--	2.10211	P	3.2027	P	1.02497	P	2.07028	P	0.838838	P	1.43287	P	-2.05089	-1.54699	-2.20073	-1.9396	1.912	P	2.16377	P	1.22529	P	1.10911	P	2.12034	P	2.73343	P	-1.55621	-1.97207	1.1422	1.30634
IPF17998	orf19.3147	--	1.13763	P	1.88063	P	0.706016	P	0.715167	P	0.460137	P	0.805555	P	-1.61133	-2.62964	-2.47236	-2.33458	0.096	A	0.387701	P	0.234483	P	0.390326	P	0.302292	P	0.389049	A	2.44253	1.00677	3.14888	1.00348
IPF18316.3f	orf19.5145	--	0.943396	P	1.01802	P	0.505108	P	0.55857	P	0.363895	P	0.427083	P	-1.86771	-1.82254	-2.06277	-1.68921	0.748667	P	0.501337	P	0.391954	P	0.23622	P	0.760029	P	0.495677	P	-1.73723	-2.11873	1.15551	-1.02465
IPF1837	orf19.5877	Alcohol O-acetyltransferase activity	3.56493	P	3.10135	P	2.40522	P	1.95931	P	1.38724	P	1.20833	P	-1.48216	-1.58288	-2.08816	-1.89189	1.936	P	2.14438	P	1.22069	P	0.827897	P	1.47278	P	2.18732	P	-1.58599	-2.59016	-1.31452	1.02002
IPF18586	orf19.761	--	0.286349	P	1.21171	P	0.175936	A	0.578298	A	0.165148	A	0.479167	A	-1.62757	-2.0953	-1.73389	-2.52879	0.646667	A	0.462567	P	0.0816092	A	0.177728	A	0.200573	A	0.618156	A	-7.92394	-2.60267	-3.2241	1.33636
IPF18690	orf19.6621	Structural constituent of cytoskeleton	2.1687	P	2.23536	P	0.015891	A	1.04192	P	1.36902	P	2.05208	P	-136.473	-2.14542	-1.52576	-1.45864	0.764	A	1.10963	P	0.624138	P	1.16423	P	0.906877	P	1.06052	A	-1.22409	1.04921	1.18701	-1.0463
IPF1922	orf19.7148	--	1.50499	P	1.84009	P	0.900114	P	1.00123	A	0.644647	P	0.66088	P	-1.67201	-1.83782	-2.3346	-2.7843	1.08133	A	0.485294	P	0.337931	A	0.28234	A	0.584527	A	0.974063	A	-3.19986	-1.71883	-1.84993	2.00716
IPF19538	orf19.6957.3	--	1.68368	P	1.23311	P	1.1101	P	0.610358	P	0.785877	P	0.578704	P	-1.51669	-2.0203	-2.14243	-2.13081	4.168	P	2.72995	P	0.545977	P	0.401575	P	1.00716	P	0.884726	P	-7.63402	-6.7981	-4.13836	-3.08564
IPF1956	orf19.7159	--	0.278579	P	0.148649	A	0.173666	P	0.261406	A	0.128702	A	0.100694	A	-1.60411	1.75855	-2.16454	-1.47624	0.44	P	0.284759	P	0.151724	P	0.191226	P	0.341691	P	0.193804	P	-2.9	-1.48912	-1.4948	-1.71137
IPF19664	orf19.2510	Chaperone binding	0.126526	P	0.0900901	P	0.0170261	A	0.01	A	0.0865604	P	0.0543981	A	-7.4313	-9.00901	-1.46171	-1.65612	0.156	P	0.102941	P	0.165517	P	0.112486	P	0.131805	P	0.100865	A	1.06101	1.09272	-1.18357	-1.02059
IPF19700	orf19.1600	--	0.317425	P	0.593468	P	0.217934	P	0.366215	A	0.291572	A	0.346065	A	-1.45652	-1.62055	-1.61397	-1.49037	0.665333	A	0.414438	M	0.34023	P	0.438695	P	0.373925	A	0.414986	A	-1.95554	1.05853	-1.77932	1.00132
IPF19810	orf19.1430	--	0.516093	P	0.431306	P	0.219069	P	0.223181	A	0.247153	P	0.219907	P	-2.35585	-1.93254	-2.08816	-1.96131	0.04	A	0.0106952	A	0.0505747	A	0.01	A	0.0372493	A	0.132565	A	1.26437	-1.06952	-1.07385	12.3948
IPF2050	orf19.5265	Structural constituent of cytoskeleton	1.04162	P	2.16892	P	0.444949	P	1.07891	P	0.615034	P	1.47685	P	-2.34153	-2.00769	-1.67104	-1.45107	0.494667	P	0.5	P	0.457471	P	0.452194	P	0.618911	P	0.527378	P	-1.08131	-1.10572	1.25117	1.05476
IPF2111	orf19.4106	--	0.18202	P	0.148649	P	0.0783201	P	0.213317	A	0.148064	A	0.165509	P	-2.32405	1.43504	-1.22933	1.11343	0.274667	P	0.243316	P	0.172414	P	0.112486	A	0.133238	P	0.0403458	A	-1.59307	-2.16307	-1.89135	-3.01537
IPF2130	orf19.7204	--	1.19423	P	0.743243	P	0.429058	P	0.908755	P	0.502278	P	0.511574	P	-2.78337	1.22269	-2.37763	-1.45286	3.16667	P	4.0615	P	1.47471	P	0.926884	P	2.04441	P	1.13112	P	-2.14731	-4.38188	-1.54894	-3.59067
IPF2142	orf19.7197	--	0.0344062	A	0.127252	M	0.0828604	M	0.175092	A	0.265376	P	0.01	A	2.4083	1.37595	7.71302	-12.7252	0.473333	P	0.131016	P	0.0402299	A	0.0832396	P	0.012894	A	0.0763689	A	-11.7657	-1.57396	-36.7096	-1.71557
IPF2186	orf19.7166	--	3.702	P	5.23761	P	1.25142	P	1.51171	P	1.00342	P	1.56944	P	-2.91101	-3.48934	-3.6807	-3.35318	10.94	P	7.68182	P	1.53391	P	1.48706	P	2.30587	P	2.95461	P	-6.96074	-5.06631	-4.79435	-2.65964
IPF3080	orf19.7042	--	1.12986	P	1.51014	P	0.745743	P	1.2984	P	0.979499	P	0.655093	P	-1.51507	-1.16308	-1.1535	-2.30522	5.42133	P	3.1631	P	0.524138	P	0.503937	P	0.581662	P	1.20029	P	-10.3433	-6.27678	-9.32042	-2.63528
IPF3092	orf19.4445	--	0.289678	P	0.216216	P	0.167991	P	0.0702836	A	0.167426	P	0.0173611	A	-1.72437	-3.07634	-1.73019	-12.4541	0.170667	P	0.145722	A	0.0448276	A	0.106862	P	0.0630373	A	0.0461095	A	-3.80718	-1.36365	-2.70739	-3.16034
IPF3239	orf19.2875	Signal recognition particle binding	0.105438	P	0.14527	A	0.202043	P	0.350185	P	0.20615	P	0.290509	P	1.91622	2.41058	1.95517	1.99978	0.664	P	0.643048	P	0.432184	P	0.301462	P	0.408309	P	0.327089	P	-1.53638	-2.1331	-1.62622	-1.96597
IPF3277	orf19.4384	Fructose transporter activity	0.744728	P	0.994369	P	0.208286	P	0.213317	A	0.235763	P	0.340857	P	-3.47123	-4.24656	-2.52316	-2.90034	0.812667	P	0.233957	P	0.302874	P	0.172103	P	0.219914	P	0.418588	A	-2.62743	-1.42209	-3.48104	1.76483
IPF3329	orf19.7388	MAP kinase kinase activity	3.0444	P	5.76689	P	1.88422	P	1.70284	P	2.01822	P	2.53935	P	-1.61573	-3.38664	-1.50845	-2.27101	2.732	P	1.64037	P	1.26322	P	1.94038	P	1.17765	P	2.34294	P	-2.16273	1.18289	-2.31987	1.4283
IPF3426	orf19.6173	--	4.60599	P	5.80068	P	3.59591	P	1.55734	P	2.28246	P	1.91204	P	-1.2809	-3.72474	-2.018	-3.03377	4.38133	P	2.79545	P	1.6023	P	1.77278	P	1.77077	P	1.69452	P	-2.7344	-1.57688	-2.47425	-1.6497
IPF3448	orf19.6185	--	0.523862	P	0.711149	P	0.115778	A	0.0369914	A	0.179954	A	0.342593	P	-4.42926	-18.6178	-2.83924	-2.09053	0.348667	A	0.251337	P	0.136207	A	0.0809899	A	0.147564	A	0.195965	A	-2.5027	-2.90102	-2.33443	-1.24468
IPF3642	orf19.6726	DNA binding	0.928968	P	1.86937	P	0.5437	P	1.25277	P	0.465831	P	0.748843	P	-1.7086	-1.49218	-1.99421	-2.49635	0.858667	A	0.86631	P	0.511494	P	1	P	0.616046	P	0.488473	P	-1.67874	1.15432	-1.39384	-1.77351
IPF3687	orf19.886	Cytoskeletal adaptor activity	1.7697	P	4.68863	P	1.12656	P	2.41615	P	0.628702	P	2.21991	P	-1.60109	-1.89616	-2.29319	-1.71665	2.16267	P	1.95455	P	0.764368	P	1.2261	P	0.977077	P	2.82133	P	-2.82935	-1.59412	-2.2134	1.44347
IPF3912	orf19.6514	Specific RNA polymerase II transcription factor activity	6.91731	P	7.01745	P	5.71453	P	4.79963	P	5.79499	P	5.38137	P	-1.19363	-1.43683	-1.18608	-1.29476	10.004	P	7.70388	P	4.06322	P	4.37177	P	3.6447	P	3.07637	P	-2.18689	-1.76237	-1.90523	-2.52529
IPF3967	orf19.673	NADPH dehydrogenase activity	0.226415	P	0.376126	P	0.143019	P	0.324291	P	0.071754	P	0.248843	P	-1.58311	-1.15984	-3.15544	-1.5115	0.344	P	0.175134	P	0.233333	P	0.119235	P	0.206304	P	0.0590778	A	-1.47429	-1.46881	-1.66744	-2.96446
IPF4160	orf19.5459	--	0.795782	P	0.942568	P	0.568672	P	0.27127	P	0.379271	P	0.709491	P	-1.39937	-3.47465	-2.09819	-1.32851	0.872	P	0.530749	P	0.336782	P	0.340832	P	0.518625	P	0.351585	P	-2.58922	-1.55721	-1.68137	-1.50959
IPF4253	orf19.1630	--	1.12986	P	1.27928	P	0.593644	P	0.762022	P	0.32574	P	0.505787	P	-1.90326	-1.6788	-3.46858	-2.52928	1.46933	P	0.906417	P	0.463218	P	0.614173	P	0.468481	P	0.695965	A	-3.17201	-1.47583	-3.13638	-1.30239
IPF4290	orf19.541	--	0.472808	P	0.587838	P	0.635641	P	0.284834	P	0.462984	P	0.259259	P	1.39267	-2.05118	-1.00105	-2.02649	1.09933	P	1.13436	P	0.616092	P	0.700787	P	0.624642	P	0.672911	P	-1.79734	-1.61133	-2.29678	-2.00859
IPF4799	orf19.3342	--	1.16426	P	1.20946	P	0.721907	P	0.791615	P	0.571754	P	0.623843	P	-1.61276	-1.52784	-2.0363	-1.93873	0.872	P	0.716578	P	0.728736	P	0.647919	P	0.830946	P	0.693083	P	-1.19659	-1.10597	-1.04941	-1.0339
IPF486	orf19.7065	--	0.471143	P	0.344032	P	0.371737	P	0.543157	P	0.478929	P	0.478009	P	-1.09449	1.53039	1.15938	1.58655	0.524667	P	0.524733	P	0.232184	P	0.291339	P	0.346705	M	0.311239	A	-2.19825	-1.7564	-1.86518	-1.98877
IPF5064	orf19.804	Transporter activity	0.782464	P	0.942568	P	0.507378	P	0.51418	M	0.357631	P	0.4375	P	-1.54217	-1.83315	-1.7286	-1.48005	0.74	P	0.44385	P	0.4	P	0.434196	P	0.315186	M	0.645533	M	-1.85	-1.02224	-2.34782	1.45439
IPF5149	orf19.6530	Signal recognition particle binding	0.520533	P	0.564189	P	0.38479	P	0.602959	A	0.36902	P	0.445602	P	-1.35277	1.06872	-1.41058	-1.26613	1.01067	P	0.81016	P	0.248276	P	0.374578	P	0.492837	P	0.353026	A	-4.07074	-2.16286	-2.05071	-2.2949
IPF5217	orf19.7270	--	2.32464	P	3.21509	P	1.78263	P	1.06042	P	1.06663	P	1.53067	P	-1.24798	-3.04751	-2.1038	-1.90859	3.922	P	2.57286	P	1.14885	P	1.09224	P	1.64756	P	1.13833	P	-3.18306	-2.28067	-1.57647	-1.74874
IPF5228.5	orf19.7265	--	0.869034	P	1.18806	P	0.46765	P	0.443896	A	0.517084	P	1.1169	P	-1.8583	-2.67644	-2.3632	-2.28876	1.004	P	1.32487	P	0.834483	P	0.76378	P	1.09742	P	1.22911	P	-1.20314	-1.73462	1.09305	-1.07791
IPF525	orf19.7085	--	0.36515	P	0.572072	P	0.124858	P	0.0332922	A	0.150342	A	0.241898	P	-2.92452	-17.1833	-2.4288	-2.36493	2.124	P	2.70588	P	1.08103	P	1.10742	P	1.08453	P	0.93804	A	-1.7233	-2.59478	-1.72667	-3.3852
IPF5291	orf19.3674	UDP-glucose 4-epimerase activity	0.0899001	A	0.0867117	A	0.0715097	P	0.0406905	A	0.0580865	A	0.0925926	A	-1.25717	-2.13101	-1.54769	1.06782	0.482667	P	0.183155	P	0.178161	P	0.0978628	P	0.190544	P	0.04683	A	-2.70916	-1.87155	-2.5603	-3.86961
IPF564	orf19.7104	--	0.864595	P	1.89865	P	0.566402	P	1.24414	P	0.510251	P	1.05324	P	-1.52647	-1.52607	-1.69445	-1.80267	1.13467	P	1.79947	P	0.664368	P	1.13498	P	0.723496	P	1.58357	P	-1.70789	-1.58546	-1.56831	-1.13633
IPF5987	orf19.7306	--	16.9956	P	14.3632	P	2.32406	P	2.27065	P	1.90148	P	2.08391	P	-7.39402	-6.36834	-9.02796	-6.94579	31.06	P	37.5388	P	3.7523	P	3.15186	P	4.32808	P	3.80403	P	-8.64979	-12.4799	-7.39589	-10.4975
IPF6011	orf19.1486	--	1.34628	P	1.52027	P	0.572077	P	0.145499	A	0.768793	P	0.731482	P	-2.35332	-10.4486	-1.75116	-2.07834	3.6	P	1.04278	P	0.631035	P	0.56243	P	0.948424	P	1.28674	A	-5.70492	-1.85406	-3.79577	1.23395
IPF6067	orf19.6734	General transcriptional repressor activity	0.570477	P	1.60811	P	0.288309	P	1.00123	P	0.644647	P	1.8206	P	-1.9787	-1.60613	-1.86114	-1.76286	1.38533	P	0.846257	P	0.37931	M	0.514061	P	0.315186	A	1.16571	M	-3.65224	-1.64622	-4.39529	1.37749
IPF6298	orf19.1964	--	4.56937	P	4.15991	P	7.71169	P	3.3619	P	5.11788	P	4.54745	P	2.99312	-1.09361	1.48042	1.31934	12.9927	P	6.4111	P	3.2023	P	3.61305	P	3.52865	P	2.64841	P	-3.6809	-1.75185	-2.11148	-1.7905
IPF6521.5eoc	orf19.1693	Transcription factor activity	0.875694	P	1.57995	P	0.014756	A	0.949445	P	0.54328	P	0.938657	P	-59.3451	-1.66408	-1.61186	-1.68321	1.74133	P	0.735294	P	0.711494	P	0.620922	P	0.853868	P	1.20029	P	-2.44743	-1.1842	-2.03935	1.63239
IPF6700	orf19.2459	--	0.532741	P	0.953829	P	0.355278	P	0.378545	P	0.240319	P	0.528935	P	-1.49951	-2.51972	-2.21681	-1.8033	0.578667	P	0.426471	P	0.512644	P	0.502812	P	0.577364	P	0.544669	P	-1.12879	1.17901	-1.00226	1.27715
IPF690.5f	orf19.7590	--	3.72975	P	3.77252	P	0.851873	P	2.41122	P	2.2631	P	1.39873	P	-4.3379	-1.59149	-1.64452	-2.50538	3.57333	P	1.68316	P	2.1908	P	2.66254	P	1.51074	P	1.47478	P	-1.57848	1.60911	-2.33015	-1.18368
IPF708	orf19.5370	--	0.680355	P	1.14752	P	0.457435	A	0.701603	A	0.292711	A	0.780093	P	-1.48733	-1.63557	-2.32433	-1.47101	1.05733	P	0.784759	P	0.408046	P	0.478065	P	0.971347	P	1.44524	P	-2.59121	-1.64153	-1.08852	1.84164
IPF7493	orf19.4682	Glucose transporter activity	0.660377	P	0.515203	P	0.41941	P	0.265105	A	0.122437	A	0.210648	A	-1.49432	-2.25705	-6.04086	-2.44487	0.802667	P	0.274733	P	0.121264	A	0.0939258	A	0.0974212	A	0.103026	A	-7.45063	-3.35478	-9.10523	-2.58394
IPF7666	orf19.4056	Transcription factor activity	0.309656	P	1.06869	P	0.0522134	A	0.0912454	A	0.110478	M	0.335648	P	-4.75293	-8.14985	-2.00922	-1.66412	0.328	A	0.0508021	A	0.0402299	A	0.0517435	A	0.0386819	A	0.131124	A	-8.15314	1.01853	-8.47941	2.58107
IPF7685	orf19.1396	ARF GTPase activator activity	1.16981	P	1.73198	P	0.667423	P	0.965475	P	0.82574	P	1.6169	P	-1.75273	-1.79392	-1.85907	-1.72875	1.22667	P	1.42914	P	0.628736	P	0.741845	P	0.711318	P	1.56268	P	-2.02724	-1.93943	-1.7437	1.07878
IPF7686	orf19.1395	Inorganic phosphate transporter activity	3.27913	P	4.36881	P	1.9319	P	2.0524	P	2.57061	P	4.08218	P	-1.71978	-1.99815	-1.72012	-1.54539	1.44667	P	1.07353	P	2.24828	P	1.3667	P	1.89112	P	2.86888	P	1.55411	1.27309	1.30722	2.67238
IPF776	orf19.5338	Transcription factor activity	1.88235	P	4.25901	P	1.13848	P	1.51048	P	1.02278	P	1.40046	P	-1.65339	-2.81964	-1.84043	-3.04114	3.64133	P	1.15775	P	0.325287	P	1.12148	P	0.30659	P	1.33285	P	-11.1942	-1.03234	-11.8769	1.15124
IPF7817	orf19.3131	NADPH dehydrogenase activity	10.2469	P	15.0788	P	2.83598	P	3.22873	P	1.86105	P	4.09491	P	-3.75644	-4.67801	-5.54614	-3.59018	6.37	P	8.10562	P	1.77356	P	3.0045	P	1.97493	P	3.97478	P	-3.64876	-2.79917	-3.29277	-2.14688
IPF7863	orf19.1449	--	2.07603	P	2.02196	P	0.122588	P	0.258323	A	0.135535	P	0.240741	P	-16.9291	-6.90742	-15.4786	-7.98494	0.659333	M	0.758021	P	0.218391	P	0.167042	P	0.219914	A	0.179395	A	-2.86916	-4.49232	-3.00898	-4.28598
IPF7998	orf19.4191	--	2.06104	P	2.06982	P	1.49376	P	0.998767	P	2.8508	P	1.22222	P	-1.37977	-2.07238	1.38318	-1.69349	2.98	P	2.06016	P	0.918391	P	1.29359	P	0.412607	P	0.428674	A	-3.24481	-1.59259	-4.70349	-3.17394
IPF823	orf19.7245	tRNA (5-methylaminomethyl-2-thiouridylate)-methyltransferase activity	0.213097	P	0.398649	P	0.289444	P	0.377312	P	0.226651	P	0.229167	P	1.35828	-1.05655	1.06361	-1.73956	0.438667	P	0.397059	P	0.202299	P	0.205849	P	0.222063	P	0.259366	P	-2.16841	-1.92888	-1.97542	-1.53088
IPF8405	orf19.1721	Carbonate dehydratase activity	1.07547	P	0.850225	P	1.62997	P	0.879162	P	1.3041	P	0.667824	P	1.51558	1.03403	1.21258	-1.27313	5.42133	P	1.86096	P	0.883908	P	1.18335	P	1.32808	P	1.18876	P	-6.13337	-1.57262	-4.08208	-1.56546
IPF8464	orf19.6855	--	0.369589	P	0.468468	P	0.192963	P	0.0480888	A	0.136674	P	0.146991	A	-1.91534	-9.74174	-2.70416	-3.18706	0.293333	P	0.258021	A	0.124138	P	0.244095	P	0.0759312	A	0.0345821	A	-2.36296	-1.05706	-3.86315	-7.46112
IPF8627	orf19.3969	Specific transcriptional repressor activity	0.188679	P	0.900901	P	0.0998865	A	0.224414	A	0.143508	P	0.47338	P	-1.88894	-4.01445	-1.81747	-1.52012	0.292	P	0.161765	P	0.133333	P	0.172103	P	0.143266	P	0.213256	P	-2.19	1.06391	-2.03816	1.31831
IPF9063	orf19.203	--	1.54772	P	1.63345	P	1.63905	P	0.970407	P	0.867312	P	1.09259	P	1.0025	-1.77451	-1.90102	-1.53314	2.676	P	1.73797	P	1.18966	P	0.963442	P	0.737822	P	0.658501	P	-2.40177	-1.83405	-1.79808	-1.52672
IPF9070	orf19.2735	tRNA-intron endonuclease activity	0.468369	P	0.489865	P	0.312145	P	0.334155	A	0.294989	P	0.230324	M	-1.50048	-1.46598	-1.58775	-2.12685	0.785333	P	0.350267	P	0.152874	A	0.213723	A	0.207736	A	1.13401	P	-5.13714	-1.63888	-3.78043	3.23754
IPF9238	orf19.6143	--	0.18535	P	0.298423	P	0.107832	P	0.117139	A	0.01	A	0.109954	A	-1.71887	-2.54759	-18.535	-2.71408	0.188	A	0.241979	P	0.116092	P	0.128234	P	0.159026	P	0.0677233	A	-1.61941	-1.88701	-1.1822	-3.57305
IPF9538	orf19.271	2,4-dienoyl-CoA reductase (NADPH) activity	26.4739	P	26.3592	P	0.16118	P	0.0480888	A	0.094533	A	0.19213	A	-164.25	-548.137	-280.049	-137.195	3.104	P	1.97594	P	0.203448	A	0.119235	A	0.121776	A	0.148415	A	-15.2569	-16.5718	-25.4893	-13.3136
IPF9560	orf19.1942	--	1.30855	P	1.31081	P	0.719637	P	0.839704	P	0.791572	P	0.709491	P	-1.81834	-1.56104	-1.6531	-1.84754	0.98	P	0.532086	P	0.693103	P	0.526434	P	0.647564	P	0.736311	P	-1.41393	-1.01074	-1.51336	1.38382
LAT1	orf19.6561	Dihydrolipoyllysine-residue acetyltransferase activity	14.3485	P	21.1858	P	13.4614	P	7.27374	P	10.5592	P	9.7419	P	-1.04431	-3.10469	-1.37095	-2.16258	28.6033	P	22.1136	P	8.68908	P	8.28796	P	12.5716	P	9.00576	P	-3.31706	-2.69384	-1.55949	-1.68341
LEU42	orf19.1375	2-isopropylmalate synthase activity	5.20977	P	7.13401	P	2.76107	P	4.68126	P	3.67768	P	4.70486	P	-1.96167	-1.56008	-2.04612	-2.21953	4.148	P	7.10027	P	6.10919	P	6.55793	P	7.57307	P	10.4207	P	1.4728	-1.0827	1.82571	1.46766
LSC2.3eoc1	orf19.1860	Succinate-CoA ligase (ADP-forming) activity	14.6093	P	16.0743	P	14.3031	P	7.67324	P	11.5957	P	7.63079	P	-1.02141	-2.09485	-1.25989	-2.10651	21.0133	P	12.8516	P	8.02069	P	8.44769	P	10.9291	P	4.69092	P	-2.61989	-1.52132	-1.69656	-2.24982
MDL2.3f	orf19.5599	ATP binding	0.278579	P	0.183559	P	0.300795	P	0.213317	A	0.253986	P	0.119213	P	1.07974	1.16212	-1.09683	-1.53975	0.428	P	0.298128	P	0.229885	P	0.170979	P	0.222063	P	0.198847	A	-1.8618	-1.74366	-1.92738	-1.49928
MDR1	orf19.5604	Multidrug transporter activity	17.2423	P	23.0154	P	0.936814	P	0.50596	P	0.544799	M	0.323302	M	-21.4129	-47.473	-34.9612	-83.7034	55.5689	P	38.0628	P	0.372797	A	0.275591	A	0.448424	A	0.997118	M	-168.932	-149.359	-142.984	-43.8814
MET3	orf19.5025	Sulfate adenylyltransferase (ATP) activity	0.591565	P	0.427928	P	1.60159	P	0.864365	P	0.675399	P	0.512731	P	2.70738	2.01988	1.14172	1.19817	2.17333	P	1.78342	P	0.929885	P	1.21597	P	2.22493	P	1.2219	P	-2.33721	-1.46666	-1.95542	-1.96174
MRP1.5f	orf19.1662	Structural constituent of ribosome	0.0432852	A	0.0596847	A	0.0874007	P	0.0924784	A	0.0364465	P	0.0324074	A	2.01918	1.54945	-1.18764	-1.8417	0.229333	M	0.231283	P	0.113793	P	0.149606	P	0.136103	P	0.0605187	A	-2.01535	-1.54595	-1.685	-3.82168
MRR1	orf19.7372	RNA polymerase II transcription factor activity	0.854051	P	0.873874	P	0.01	A	0.0240444	A	0.0381549	A	0.010787	A	-74.6161	-35.6038	-17.106	-75.5839	1.73333	P	0.734626	P	0.0279885	A	0.024685	A	0.0150287	A	0.0785303	A	-69.8797	-19.626	-83.4538	-5.91145
MSB1	orf19.1133	--	0.875694	P	1.90146	P	0.528377	A	0.745993	A	0.799544	P	1.0162	P	-1.87918	-2.42132	-1.6269	-2.76377	1.83467	P	1.0254	P	0.724138	P	0.970754	P	0.845272	P	1.80259	P	-2.53359	-1.05629	-2.1705	1.75794
NDH1	orf19.339	NADH dehydrogenase activity	18.3346	P	17.7455	P	15.3922	P	11.3342	P	17.2853	P	9.68576	P	-1.18849	-1.56016	-1.05869	-1.79657	23.9307	P	19.6384	P	13.6839	P	12.8425	P	14.4298	P	8.48991	P	-1.75395	-1.5336	-1.5358	-2.0915
NOP4	orf19.5198	RNA binding	0.985572	P	0.536036	P	0.751419	P	0.221948	A	1.44419	P	0.454861	P	-1.31161	-2.41514	1.46533	-1.17846	1.032	P	0.501337	P	0.291954	P	0.340832	P	0.208453	A	0.188761	A	-3.5348	-1.47092	-4.44018	-2.38657
NUC2	orf19.6531	--	8.7636	P	10.1881	P	10.0551	P	6.35882	P	7.62415	P	6.27662	P	1.12481	-1.55523	-1.15417	-1.61488	17.87	P	12.4693	P	6.77644	P	7.00563	P	6.17908	P	4.41931	P	-2.79947	-1.84258	-1.55039	-1.62147
OGG1	orf19.7190	Oxidized purine base lesion DNA N-glycosylase activity	0.599334	P	0.712838	P	0.269012	P	0.181258	A	0.416856	P	0.372685	P	-2.2279	-3.93273	-1.43775	-1.91271	0.569333	P	0.191176	P	0.132184	M	0.087739	A	0.104585	A	0.0878962	A	-4.30713	-2.17892	-5.44376	-2.17502
ORM1	orf19.5751	--	2.59489	P	2.71847	P	1.95914	P	1.21455	P	1.93622	P	1.78588	P	-1.32451	-2.23825	-1.34019	-1.5222	3.60933	P	2.64037	P	1.60345	P	1.73791	P	2.26361	P	1.68588	P	-2.25098	-1.51928	-1.5945	-1.56617
PEX13	orf19.7282	Protein binding	0.335183	P	0.760135	P	0.227015	P	0.300863	P	0.275626	P	0.765046	P	-1.47648	-2.52651	-1.98921	-1.9062	0.468	P	1.08556	P	0.537931	P	0.808774	P	0.498567	P	0.564841	P	1.14943	-1.34223	1.06531	-1.92189
PHR1	orf19.3829	1,3-beta-glucanosyltransferase activity	4.57658	P	12.1791	P	1.53973	P	1.53453	P	1.97893	P	7.23669	P	-2.75321	-7.78276	-2.25187	-1.70151	2.76467	P	1.61096	P	1.3023	P	1.26715	P	1.37393	P	2.63401	P	-1.95558	-1.29392	-1.97772	1.63015
PRP12	orf19.4379	Exonuclease activity	1.79245	P	3.43018	P	1.02611	P	1.95684	P	0.953303	P	2.04977	P	-1.74685	-1.75291	-1.88026	-1.67345	0.913333	P	1.31551	P	1.17586	P	0.928009	P	1.02149	P	1.44236	P	1.28744	-1.41756	1.11842	1.09643
PRP5	orf19.6831	ATP-dependent RNA helicase activity	0.425083	P	0.203829	P	0.38933	P	0.303329	P	0.389522	P	0.258102	P	-1.09183	1.48816	-1.0913	1.26627	0.552	P	0.350267	P	0.236782	P	0.229471	P	0.302292	P	0.224784	A	-2.33126	-1.52641	-1.82605	-1.55824
PRY2	orf19.7218	--	0.531632	P	0.756757	P	0.303065	P	0.483354	M	0.205011	P	0.282407	P	-1.75419	-1.56564	-2.59318	-2.67966	5.348	P	3.87166	P	1.34368	P	0.555681	P	3.41404	P	5.40346	P	-3.98012	-6.96742	-1.56647	1.39564
RBT4	orf19.6202	--	3.91232	P	3.99212	P	2.10783	P	1.61036	P	1.35991	P	3.10301	P	-1.85609	-2.47902	-3.19927	-1.59283	1.78133	P	0.990642	P	1.3	P	0.793026	P	1.47564	P	1.85735	P	-1.37026	-1.24919	-1.20716	1.87489
RIP1	orf19.5893	Ubiquinol-cytochrome-c reductase activity	14.2542	P	20.866	P	15.4813	P	15.0838	P	15.4009	P	12.6539	P	1.08609	-1.38333	1.08045	-1.64897	16.228	P	15.0321	P	10.1	P	10.3431	P	21.2607	P	14.2752	P	-1.60673	-1.45335	-1.46285	-1.57775
RKI1	orf19.1701	Ribose-5-phosphate isomerase activity	2.55494	P	1.34347	P	1.48241	P	0.837238	P	1.59453	P	0.916667	P	-1.72351	-1.60464	-1.60231	-1.4656	1.66533	P	1.0107	P	0.966667	P	1.20472	P	0.906877	P	0.644092	P	-1.72276	1.19198	-1.83634	-1.56918
RPC31	orf19.2831	DNA-directed RNA polymerase activity	0.137625	P	0.253378	P	0.164586	P	0.0616523	A	0.313212	P	0.158565	P	1.1959	-4.1098	2.27584	-1.59795	0.446667	P	0.278075	P	0.131034	P	0.178853	P	0.189112	P	0.0835735	A	-3.40877	-1.55477	-2.36192	-3.32731
RPN4	orf19.1069	Transcription factor activity	4.05771	P	2.83502	P	2.3723	P	3.19544	P	2.47665	P	1.9375	P	-1.69499	1.17947	-1.58525	-1.34298	5.03867	P	4.20789	P	2.37529	P	2.15636	P	2.02865	P	1.93228	P	-2.02375	-1.83066	-2.33407	-2.13463
SEC31	orf19.6217	--	3.92453	P	8.24662	P	1.92281	P	4.60419	P	2.1344	P	5.09606	P	-2.04103	-1.79111	-1.83871	-1.61823	6.63467	P	4.3877	P	2.33563	P	2.74803	P	2.87393	P	6.71037	P	-2.84063	-1.59667	-2.30857	1.52936
SEN1	orf19.5938	ATP-dependent RNA helicase activity	0.224195	P	0.349099	P	0.105562	P	0.0887793	A	0.145786	M	0.170139	A	-2.12383	-3.93221	-1.53784	-2.05185	0.0386667	A	0.13369	P	0.0494253	A	0.0708662	A	0.120344	A	0.334294	A	1.27824	-1.88651	3.11234	2.50052
SIS2	orf19.7378	Protein phosphatase inhibitor activity	2.0333	P	4.05068	P	1.15664	P	2.15906	P	1.10706	P	1.97454	P	-1.75793	-1.87613	-1.83666	-2.05146	1.16133	P	1.74733	P	1.22759	P	1.04949	P	0.952722	P	1.14265	P	1.05705	-1.66492	-1.21896	-1.52919
SNF3	orf19.5962	Glucose transporter activity	0.82131	P	1.19032	P	0.475596	P	0.367448	A	0.370159	P	0.569444	P	-1.72691	-3.23941	-2.2188	-2.09031	0.976	P	0.604278	P	0.329885	P	0.307087	P	0.481375	P	0.57781	M	-2.95861	-1.96778	-2.02752	-1.04581
SOD22.3f	orf19.7111	Manganese superoxide dismutase activity	2.34462	P	15.0918	P	1.29285	P	2.79408	P	1.77563	P	12.213	P	-1.86202	-5.17848	-1.5139	-1.54033	0.622667	P	9.08155	P	0.355172	P	4.57143	P	0.924069	P	8.683	P	-1.75314	-1.98659	1.48405	-1.0459
SOU3	orf19.732	2,4-dienoyl-CoA reductase (NADPH) activity	0.899001	P	0.704955	P	0.545971	P	0.782984	P	0.455581	P	0.760417	P	-1.64661	1.11069	-1.97331	1.07867	0.889333	P	0.602941	P	0.525287	P	0.337458	P	0.762178	P	0.82853	P	-1.69304	-1.78672	-1.59718	-1.67328
TAF90	orf19.536	General RNA polymerase II transcription factor activity	2.20311	P	2.4741	P	1.79796	P	2.1418	P	1.76993	P	1.6956	P	-1.22534	-1.15515	-1.24474	-1.45913	1.30133	P	1.16444	P	0.597701	P	0.654668	P	0.87106	P	0.747839	P	-2.17723	-1.77867	-1.49396	-1.55707
TFB2	orf19.5846	General RNA polymerase II transcription factor activity	1.29412	P	1.41273	P	0.850738	P	0.694821	P	1.10592	P	1.06597	P	-1.53787	-1.99599	-1.45619	-1.83925	1.64533	P	1.65642	P	1.38736	P	1.3667	P	1.12321	P	1.42795	P	-1.18595	-1.21198	-1.46485	-1.15999
TIM22	orf19.1352	Protein transporter activity	1.13097	P	1.90428	P	1.03519	P	0.639951	P	1.16401	P	0.972222	P	-1.09252	-2.97567	1.02922	-1.95869	1.58	P	1.49733	P	0.702299	P	0.701912	P	1.15473	P	0.746398	A	-2.24975	-2.13321	-2.26444	-3.10287
TOF1	orf19.4136	--	0.54162	P	0.568131	P	0.317253	P	0.578298	P	0.373007	P	0.616898	P	-1.72932	1.00866	-1.74338	1.22783	0.772667	P	0.438503	P	0.247701	P	0.288526	P	0.148997	P	0.138329	A	-2.40278	-1.51727	-1.73605	-1.85561
TRK1.5f	orf19.600	Chloride transporter activity	0.927858	P	1.75563	P	0.503973	P	0.678175	P	0.49943	P	0.632523	P	-1.84109	-2.58876	-1.71201	-2.39926	1.30067	P	0.52139	P	0.62931	P	0.720472	P	0.61318	P	0.814841	P	-2.07966	1.3796	-2.06088	1.56105
UGA2	orf19.345	Succinate-semialdehyde dehydrogenase activity	1.04883	P	0.841216	P	0.593644	P	0.264488	A	0.349658	P	0.282407	A	-1.76819	-2.65252	-3.0457	-2.37693	1.69667	P	1.00134	P	1.16724	P	1.12823	P	1.39542	P	1.44452	P	-1.38577	1.16233	-1.14374	1.47003
WHI3	orf19.6494	RNA binding	1.59711	P	2.1768	P	0.956867	P	1.14797	A	0.969248	P	1.07755	P	-1.66911	-1.89623	-1.64779	-2.02015	3.43467	P	1.9893	P	1.15632	P	1.23172	P	1.44269	P	2.48703	M	-2.97034	-1.61506	-2.38073	1.2502
YAE1	orf19.7037	--	0.390677	P	0.292793	P	0.278093	P	0.680641	P	0.428246	P	0.359954	P	-1.40484	2.32465	1.09616	1.22938	0.498667	P	0.566845	P	0.257471	P	0.266592	P	0.32235	P	0.35879	P	-1.93679	-2.12627	-1.54698	-1.57988
YNK1	orf19.4311	Nucleoside diphosphate kinase activity	40.7014	P	55.3412	P	37.7911	P	55.2158	P	53.5	P	32.3009	P	-1.07701	-1.00227	1.31445	-1.7133	85.1107	P	56.885	P	30.2908	P	33.081	P	51.7751	P	38.3833	P	-2.80979	-1.71957	-1.64385	-1.48203

## Sheet: 201 KO UP
Microarray Probe Name	orf19 Name	GO Annotation (Molecular Function)	F5-1	Flags	F5-2	Flags	F5A-1	Flags	F5A-2	Flags	F5B-1	Flags	F5B-2	Flags	F5Δmrr1-A1 vs. F5-1	F5Δmrr1-A2 vs. F5-2	F5Δmrr1-B1 vs. F5-1	F5Δmrr1-B2 vs. F5-2	G5-1	Flags	G5-2	Flags	G5A-1	Flags	G5A-2	Flags	G5B-1	Flags	G5B-2	Flags	G5Δmrr1-A1 vs. G5-1	G5Δmrr1-A2 vs. G5-2	G5Δmrr1-B1 vs. G5-1	G5Δmrr1-B2 vs. G5-2
ACF2	orf19.3417	Glucan 1,3-beta-glucosidase activity	1.31576	P	1.96284	P	1.55675	P	2.10728	P	1.26765	P	1.8588	P	1.17834	1.05504	-1.04254	-1.06503	0.998667	P	0.637701	P	1.93908	P	1.34456	P	1.67154	P	1.85735	P	1.94167	2.6212	1.51714	3.08683
AMO1	orf19.5784	--	0.603774	P	1.16667	P	0.757094	P	4.25524	P	0.414579	P	1.94907	P	1.25394	3.64735	-1.45636	1.67063	0.28	A	0.459893	A	1.41897	P	1.78223	P	1.25028	P	2.0634	P	8.68513	2.9005	3.85209	3.68359
AMO2	orf19.3152	--	1.32186	P	1.00563	P	0.77639	P	0.758323	P	1.28474	P	1.32292	P	-1.70258	-1.32612	-1.0289	1.31551	0.326667	P	0.307487	P	0.722989	P	0.507163	P	0.478065	P	0.455331	P	2.21323	1.55475	1.55254	1.48082
AMS1	orf19.2768	Alpha-mannosidase activity	0.410655	P	0.327703	P	0.273553	P	1.06412	P	0.400911	P	0.875	P	-1.50119	3.24721	-1.0243	2.6701	0.314667	P	0.513369	P	1.44368	P	1.10745	P	0.805399	P	1.3098	P	4.58796	1.56885	3.51944	2.55138
AQY1	orf19.2849	Water channel activity	0.874584	P	1.25788	P	0.922247	P	4.41492	P	0.703872	P	2.76562	P	1.10877	3.53719	-1.21983	2.26468	0.672	P	0.743315	P	4.23333	P	5.38037	P	1.30146	P	8.66859	P	6.2996	1.75089	6.49659	9.22132
ARA1	orf19.2172	D-arabinose 1-dehydrogenase [NAD(P)+] activity	0.642619	P	0.671171	P	0.515324	P	1.31443	P	0.783599	P	1.15625	P	-1.24702	1.95841	1.21938	1.72274	0.412	P	0.397059	P	1.07011	P	0.710602	P	0.822272	P	0.822767	P	2.59737	2.07091	1.72476	2.07215
ARR3	orf19.3122	Arsenite transporter activity	2.36238	P	1.61205	P	5.11635	P	3.22565	P	1.96412	P	2.19965	P	2.19804	1.93237	-1.15358	1.45271	0.816667	P	1.13636	P	1.88333	P	1.63968	P	1.93645	P	2.19741	P	2.38307	1.78007	1.94702	1.89887
ATP8.exon2	orf19.2066.1	--	3.79134	P	3.51577	P	9.94892	P	4.99014	P	14.0888	P	8.7963	P	2.62411	1.68874	2.16733	2.50196	12.572	P	12.4567	P	12.619	P	13.341	P	12.2161	P	6.5	P	-1.02913	-1.01303	1.06117	-1.94138
AYR2	orf19.5615	Acylglycerone-phosphate reductase activity	2.16093	P	1.75225	P	2.92736	P	4.84464	P	2.62528	P	4.32523	P	1.35467	2.76481	1.21489	2.46838	0.694667	P	1.47727	P	3.37356	P	2.38682	P	2.94938	P	2.32277	P	4.88351	2.04182	3.85801	1.87627
CAN2	orf19.111	Basic amino acid transporter activity	3.01054	P	4.38851	P	4.98524	P	8.93773	P	1.34966	P	3.18056	P	1.6616	2.0576	-2.25763	-1.37371	0.638667	P	0.989973	P	3.24368	P	2.82092	P	2.90551	P	2.77233	P	5.10126	2.89115	4.56963	2.84284
CAP2	orf19.4597	--	1.1465	P	0.942568	P	1.8933	P	1.75586	P	1.73804	P	1.74074	P	1.65137	1.86284	1.51595	1.84681	1.29467	P	1.77615	P	1.8984	P	1.75215	P	2.0069	P	1.44669	P	1.55013	-1.06882	1.35336	-1.31224
CBF1	orf19.2876	Centromeric DNA binding	2.1687	P	1.37387	P	4.16005	P	2.82491	P	3.32346	P	2.31366	P	1.91822	2.05616	1.53247	1.68404	1.52	P	4.61417	P	3.62567	P	3.18338	P	3.35057	P	1.79251	P	2.20433	1.27264	2.09433	-2.02268
Cirt2	orf19.3820	--	0.961154	P	0.761261	P	1.59364	P	2.30703	P	1.74943	P	1.90162	P	1.65805	3.03053	1.82013	2.49799	0.205333	M	0.883015	P	0.998663	P	1.31519	P	0.9	P	0.945245	P	4.38312	-1.13097	6.40513	-1.05651
CLC1	orf19.4594	Structural molecule activity	0.754717	P	0.345721	P	1.93871	P	1.48335	P	1.70843	P	1.83449	P	2.56879	4.29061	2.26367	5.30628	0.738667	P	2.21597	P	2.28342	P	2.73926	P	2.15977	P	1.2536	P	2.92388	-1.03044	3.70838	-1.82149
CMD1	orf19.4413	Calcium ion binding	0.770255	P	0.720721	P	1.30874	P	1.53391	P	1.28246	P	1.14583	P	1.6991	2.1283	1.66498	1.58984	0.765333	P	0.917885	P	0.989305	P	1.31519	P	1.50805	P	1.13112	P	1.97044	-1.07781	1.71845	1.14335
DCP1	orf19.423	Hydrolase activity	0.937847	P	0.798423	P	1.57662	P	1.43033	P	2.1754	P	1.24769	P	1.6811	1.79145	2.31957	1.56269	1.708	P	1.6063	P	1.95455	P	1.70917	P	1.97586	P	1.22911	P	1.15683	-1.2168	1.00068	-1.59022
EBP1	orf19.125	NADPH dehydrogenase activity	0.618202	P	0.666667	P	0.976163	P	6.20222	P	2.24032	P	5.69444	P	1.57904	9.30333	3.62393	8.54167	0.932	P	2.47326	P	4.76667	P	4.83238	P	8.30709	P	13.6657	P	5.11445	3.35876	5.18496	5.52538
ECM41.3	orf19.2613	--	5.01998	P	6.29842	P	4.30647	P	7.8693	P	4.14465	P	7.07639	P	-1.16568	1.24941	-1.2112	1.12352	0.221333	P	0.215241	P	0.597701	P	1.7851	P	0.352081	P	4.2781	P	2.70046	1.63576	2.66168	2.48835
ERV1.3	orf19.2863.1	Thiol oxidase activity	0.344062	P	0.45045	P	0.614075	P	1.11961	P	0.604784	P	0.966435	P	1.78478	2.48552	1.75777	2.14549	0.497333	A	1.53206	P	0.67246	P	0.439828	P	0.768966	P	0.716138	A	1.54618	2.27829	-1.13074	1.06495
FDH12	orf19.638	Formate dehydrogenase activity	0.647059	P	1.68468	P	0.69353	P	0.853268	P	1.05923	P	0.966435	P	1.07182	-1.97439	1.63698	-1.74319	0.382667	P	0.386364	P	1.34138	P	1.21633	P	1.58774	P	0.976945	P	3.50567	4.16789	2.57698	2.66699
FTR1	orf19.7219	Ferrous iron transporter activity	0.344062	P	0.645833	P	0.614075	P	1.11961	P	1.15661	P	1.2934	P	1.78478	2.48552	2.04034	1.96447	0.369333	A	0.401575	P	0.147727	P	0.464183	P	0.572414	P	0.50072	P	1.50332	2.69501	1.24652	3.36151
GCV1	orf19.5519	Glycine dehydrogenase (decarboxylating) activity	0.376249	P	0.989865	P	0.589103	P	0.717633	P	2.78815	P	3.85069	P	1.56573	2.41386	1.78039	3.89012	0.82	P	3.1856	P	3.2861	P	7.68338	P	5.57241	P	2.73919	P	6.79563	-1.03155	9.36998	-1.19966
GCV3	orf19.5006	--	3.99556	P	2.67905	P	7.92054	P	8.67448	P	7.30524	P	8.23958	P	1.98234	3.23789	1.82834	3.07556	2.87867	P	5.96658	P	10.869	P	20.9499	P	11.8819	P	22.1095	P	3.77569	1.99141	1.80188	1.45388
GRP4	orf19.3150	Oxidoreductase activity	2.76693	P	2.84347	P	1.85358	P	5.09001	P	3.04328	P	5.28704	P	-1.49275	1.79007	1.09988	1.85936	0.604	P	0.631016	P	2.01379	P	1.24212	P	2.45669	P	2.60663	P	3.33409	3.89323	2.05649	4.13084
GSH1.exon2	orf19.5059	Glutamate-cysteine ligase activity	0.631521	P	0.488739	P	1.21226	P	0.826141	P	0.960137	P	0.944444	P	1.91959	1.69035	1.52036	1.93241	0.625333	P	0.814398	P	0.683155	P	0.934097	P	0.802299	P	0.57781	P	1.28299	1.19211	1.49376	-1.18232
GSH2	orf19.6404	Glutathione synthase activity	0.597114	P	0.66554	P	1.5664	P	0.98397	P	1.00228	P	1.0787	P	2.62329	1.47845	1.67854	1.62079	1.06533	P	1.08211	P	1.00936	P	1.16189	P	1.02299	P	1.13112	P	-1.04139	1.07208	1.09064	1.12064
HAP3	orf19.517	Transcription factor activity	0.512764	P	0.346847	P	0.861521	P	0.879162	P	0.699317	P	0.521991	P	1.68015	1.55517	1.76494	1.50496	0.657333	M	0.809899	P	0.597594	P	0.651862	P	0.733333	P	0.678674	P	1.11562	1.35527	-1.00839	1.13568
HSP12	orf19.3160	--	6.98613	P	14.531	P	7.76277	P	22.8711	P	7.95273	P	20.2118	P	1.11755	1.58799	1.14064	1.40021	0.194667	A	0.791444	P	2.33333	P	1.88754	P	1.77165	P	5.86816	P	11.9863	2.23851	10.2403	5.27231
HXT5.3f	orf19.2021	Fructose transporter activity	18.0344	P	15.5366	P	24.6612	P	26.3169	P	20.6247	P	20.5405	P	1.37995	1.66949	1.14972	1.33511	5.02133	P	5.57954	P	13.0914	P	13.0387	P	10.6215	P	15.214	P	2.79487	1.94756	2.71321	2.78341
HXT5.5f	orf19.2021	Fructose transporter activity	22.2736	P	18.0389	P	23.9132	P	38.8607	P	21.8309	P	26.3634	P	1.0751	2.15364	-1.02528	1.48228	5.602	P	6.10562	P	14.0672	P	12.4656	P	11.6496	P	18.3559	P	2.56021	1.91414	2.23017	2.95687
IFC1	orf19.3746	Oligopeptide transporter activity	0.249723	P	0.119369	A	0.181612	P	0.239211	A	0.148064	P	0.155093	P	-1.37503	2.00395	-1.68659	1.29927	0.02	A	0.102941	A	0.336782	P	0.557307	P	0.152981	P	0.495677	P	16.8391	1.4861	2.27163	2.31729
IFC3	orf19.3749	Oligopeptide transporter activity	1.20607	P	0.637387	P	1.32274	P	1.56474	P	0.886484	P	1.41628	P	1.18568	2.61689	-1.13508	2.51003	1.052	P	2.33556	P	6.58506	P	11.5836	P	3.51856	P	11.5533	P	6.25956	1.50652	9.10531	2.72448
IFF11	orf19.5399	--	0.36182	P	0.426239	P	0.321226	P	0.741677	A	0.341116	P	0.35706	P	-1.09894	1.72309	-1.07117	-1.19655	0.129333	A	0.205882	P	0.556322	P	0.898281	P	0.316086	P	1.65778	P	4.30146	1.53527	4.17003	5.59171
IFF3	orf19.4361	--	0.192009	A	0.291667	A	0.143019	A	0.411837	A	0.200456	A	0.248843	A	-1.34254	1.41201	1.04399	-1.17209	0.238667	A	0.204545	A	0.905747	P	0.637536	P	0.498313	P	0.654179	P	3.79503	2.4362	2.67124	3.19821
IFI1	orf19.1130	--	2.63485	P	2.67342	P	1.916	P	4.58446	P	2.48633	P	4.33449	P	-1.37518	1.71483	-1.05973	1.62133	0.476	P	0.795455	P	1.45862	P	3.72779	P	1.41845	P	5.37176	P	3.06433	1.78319	1.75178	1.50942
IFI2.5f	orf19.1037	--	3.12098	P	2.71059	P	1.02951	P	5.22133	P	2.64465	P	4.47685	P	-3.10469	1.94663	-1.16844	1.63226	2.29733	P	2.7607	P	5.24023	P	3.77436	P	5.01237	P	5.44308	P	2.27676	1.80279	1.64209	1.97299
IFQ3	orf19.54	--	3.28191	P	2.25676	P	2.62656	P	3.68804	P	3.5877	P	3.9537	P	-1.24951	1.63422	1.09317	1.75194	1.032	P	2.05481	P	6.0069	P	4.78223	P	4.66254	P	5.09078	P	5.82064	2.26908	4.63395	2.47749
IMG1	orf19.1967	Structural constituent of ribosome	3.19645	P	2.13401	P	4.88763	P	4.11344	P	6.74943	P	3.32407	P	1.52908	1.92756	2.11154	1.55767	5.46133	P	7.36108	P	3.23797	P	5.32378	P	5.81494	P	4.41931	P	1.06475	2.27336	-1.02584	1.36484
INO1	orf19.7585	Inositol-3-phosphate synthase activity	1.60599	P	1.51802	P	2.30988	P	1.61036	P	1.97608	P	0.832176	P	1.43828	1.06083	1.23044	-1.82416	4.22933	P	4.65575	P	9.32644	P	8.12321	P	8.87739	P	10.5259	P	2.19852	1.98847	1.57061	1.69832
IPF10158	orf19.4627	Structural molecule activity	0.90788	P	0.585586	P	1.55959	P	1.5672	P	1.64692	P	1.1331	P	1.71784	2.6763	1.81403	1.93499	1.05067	P	1.48819	P	1.23396	P	1.60458	P	1.97931	P	1.27666	P	1.88386	1.20603	1.52721	1.0346
IPF1020	orf19.4580	--	1.4273	P	1.1982	P	2.67877	P	6.38101	P	3.00797	P	4.20255	P	1.87681	5.32551	2.10745	3.50739	1.60133	P	6.31721	P	7.05214	P	5.78223	P	7.17931	P	5.44236	P	4.48333	-1.11634	3.61089	-1.29579
IPF10470	orf19.1789	--	0.836848	P	0.47973	P	1.44154	P	0.838471	P	1.62415	P	0.806713	P	1.72259	1.7478	1.94079	1.6816	0.845333	P	1.07874	P	1.06417	P	1.5659	P	1.68851	P	0.902017	P	1.99744	1.01369	1.85241	-1.17977
IPF10533.exon2	orf19.1255	Transcription factor activity	0.18646	P	0.322072	P	0.484677	P	0.303329	P	0.210706	P	0.253472	P	2.59937	-1.06179	1.13004	-1.27064	0.124	A	0.127005	P	0.194253	P	0.213467	P	0.192351	P	0.259366	P	1.56656	1.51451	1.72151	2.04217
IPF10568	orf19.1440	--	0.532741	P	0.431306	P	0.859251	P	0.954377	P	0.816629	P	0.709491	P	1.61289	2.21276	1.53288	1.64498	0.258667	M	0.227222	P	0.160428	P	0.210602	P	0.195402	P	0.128242	A	-1.32376	1.41635	-1.22823	-1.25098
IPF10662	orf19.5760	--	9.99223	P	22.1047	P	15.4325	P	14.1708	P	9.14408	P	18.1406	P	1.54467	-1.56961	-1.09752	-1.1991	2.13267	P	4.29278	P	6.43046	P	9.28653	P	10.2497	P	14.5353	P	3.043	2.62191	4.39334	3.58785
IPF11059	orf19.1395	Inorganic phosphate transporter activity	0.900111	P	0.75	P	0.278093	P	0.466091	P	0.593394	P	0.793981	P	-3.23673	-1.60913	-1.51689	1.05864	0.128	A	0.112299	P	0.403448	P	0.340974	P	0.213723	P	0.391931	P	3.15194	1.90315	2.66386	3.49005
IPF11105	orf19.2262	--	1.43174	P	1.21622	P	1.42679	P	3.10049	P	1.75911	P	3.26505	P	-1.01168	2.65341	1.22327	2.79066	2.81067	P	4.05882	P	5.6454	P	5.66547	P	7.15917	P	8.37464	P	2.01632	1.81468	2.02764	2.11739
IPF11106	orf19.2263	--	1.11876	P	0.732545	P	1.6538	P	1.61529	P	2.37244	P	1.34954	P	1.47825	2.9393	1.92844	1.92867	1.02533	P	2.3279	P	2.30481	P	1.8288	P	2.27586	P	0.908501	P	2.19733	-1.01473	1.78009	-2.42417
IPF11328	orf19.2985	--	0.524972	P	0.530405	P	0.860386	P	1.11837	P	1.29157	P	0.796296	P	1.63892	2.10852	2.46027	1.5013	0.52	P	0.732283	P	0.826203	P	0.56447	P	0.575862	P	0.714697	P	1.10743	-1.12826	1.08552	-1.15602
IPF1134	orf19.5433	--	0.339623	P	0.256757	P	0.867196	P	0.508015	P	0.931663	P	0.585648	P	2.55341	1.97858	2.74323	2.28095	0.736	P	0.708661	P	1.09091	P	1.21776	P	0.827586	P	0.708934	P	1.12444	-1.53939	1.65457	-1.5388
IPF1143	orf19.5438	DNA binding	0.982242	P	1.05743	P	0.834279	P	1.86067	P	1.20046	P	1.46644	P	-1.17735	1.75961	1.22216	1.38679	0.762667	P	1.39305	P	1.89655	P	1.27364	P	2.28571	P	1.52305	P	2.48674	1.6408	1.63847	1.6091
IPF11499.repeat2	orf19.1365	--	0.735849	P	0.655405	P	0.653802	P	0.686806	P	0.633257	P	0.568287	P	-1.12549	1.04791	-1.16201	-1.1533	0.0506667	A	0.15107	A	0.42069	P	0.968481	P	0.289089	P	1.0634	P	8.30308	1.91361	6.66386	2.00865
IPF11503	orf19.3902	--	0.463374	P	0.435811	P	0.720204	P	0.708385	P	0.559795	P	0.899884	P	1.62025	1.53631	1.21007	1.99009	0.332667	P	0.518717	P	1.78276	P	1.4735	P	2.73791	P	1.77305	P	13.2753	6.17225	10.0044	3.72755
IPF11667	orf19.4771	--	1.14539	P	0.843468	P	0.679909	P	1.61282	P	1.12756	P	1.43287	P	-1.68463	1.91213	-1.01581	1.69878	0.765333	P	1.01872	P	1.8908	P	1.65759	P	1.6288	P	1.63977	P	2.47056	1.59887	2.16584	1.60964
IPF11900	orf19.4180	Signal recognition particle binding	0.810211	P	2.00113	P	1.46879	P	0.946979	P	5.16059	P	4.38194	P	1.81284	1.82017	1.51013	2.18974	4.096	P	4.84814	P	3.91711	P	4.7192	P	4.83793	P	2.11671	P	1.18114	1.23768	1.15215	-1.85056
IPF11995	orf19.2761	Phosphoethanolamine N-methyltransferase activity	1.2697	P	0.809685	P	2.55505	P	1.59063	P	1.90661	P	1.68981	P	2.01233	1.9645	1.50162	2.087	0.816	P	1.13048	P	0.979947	P	1.07593	P	1.40345	P	0.834294	P	1.71991	1.15362	1.31854	-1.17458
IPF12117	orf19.5648	--	2.57048	P	1.89189	P	5.32236	P	3.16646	P	4.2221	P	3.27199	P	2.07057	1.6737	1.64253	1.72948	4.19867	P	3.49156	P	4.09358	P	5.91691	P	4.18161	P	4.00865	P	-1.00408	-1.17242	1.40923	-1.02119
IPF12179	orf19.3872	--	2.50721	P	1.75113	P	3.99773	P	2.28607	P	3.60364	P	3.43171	P	1.59449	1.30548	1.43731	1.95972	1.75867	P	1.87701	P	3.40575	P	3.60458	P	3.41057	P	3.00865	P	1.93655	1.81703	2.04961	1.6029
IPF1228	orf19.2059	--	4.20089	P	1.8598	P	3.3882	P	3.76572	P	5.96071	P	5.31192	P	-1.22787	2.04482	1.42164	2.88048	0.493333	P	0.946524	P	2.77874	P	2.34456	P	2.06524	P	1.75072	P	5.51989	2.19546	4.66088	1.81072
IPF12900	orf19.2246	--	0.165372	P	0.717905	M	0.247446	P	0.499383	P	1.67995	P	1.44444	P	1.4963	2.6554	1.79854	2.00725	0.828667	P	1.54781	P	1.33422	P	1.54441	P	1.47241	P	0.95317	P	1.90125	1.16065	1.92545	-1.40016
IPF13081	orf19.1162	--	4.55549	P	4.29899	P	6.03519	P	5.46301	P	4.71355	P	5.72859	P	1.3972	1.21388	1.05777	1.56388	1.004	P	2.03008	P	4.27989	P	4.37536	P	3.27165	P	4.19236	P	4.30549	1.62926	4.39598	1.93648
IPF13493	orf19.5063	--	3.59933	P	2.73761	P	6.82179	P	11.2281	P	7.13553	P	7.24537	P	1.89529	4.10143	1.98246	2.6466	10.4787	P	12.6479	P	10.992	P	15.4771	P	14.1851	P	18.3199	P	1.35371	1.15065	1.47701	1.66666
IPF13554	orf19.1301	--	0.203108	P	0.0698198	P	0.295119	P	0.212084	P	0.379271	P	0.302083	P	1.45302	3.03759	1.86734	4.32661	0.113333	A	0.255343	P	0.233957	P	0.166189	P	0.306897	P	0.0691643	A	2.70791	1.09141	1.46637	-3.38263
IPF13675	orf19.1656	Phosphatidylinositol binding	1.14761	P	1.39189	P	0.969353	P	3.82614	P	1.01367	P	2.10417	P	-1.1839	2.74888	-1.13214	1.51173	0.129333	A	0.16377	A	0.675862	P	0.39255	P	0.660293	P	0.492795	P	6.43271	3.97133	1.84008	2.90245
IPF138	orf19.5925	--	0.711987	P	0.739302	P	0.350738	P	0.905672	P	0.646355	P	1.08044	P	-1.71788	1.58076	1.0766	1.97067	0.146667	A	0.224599	P	0.382759	P	0.448424	P	0.35658	P	0.662824	M	2.60972	1.58763	1.53498	1.66694
IPF14113	orf19.166	--	0.752497	P	0.61036	P	1.21453	P	0.933416	P	1.29499	P	0.980324	P	1.614	1.52929	1.72092	1.60614	0.518667	P	0.897638	P	1.02674	P	1.0043	P	1.14368	P	0.688761	P	2.20503	-1.14382	1.93631	-1.4907
IPF1415	orf19.6062	--	7.97225	P	4.04505	P	12.9773	P	7.74229	P	12.7506	P	7.1794	P	1.62781	1.91402	1.59937	1.77486	7.69333	P	8.43644	P	8.61364	P	14.8352	P	8.64483	P	6.64265	P	1.12368	-1.021	1.92832	-1.29672
IPF14356	orf19.2708	--	0.775805	P	0.420045	P	1.47446	P	1.16276	P	1.57973	P	0.853009	P	1.90056	2.76818	2.03624	2.03076	0.76	P	1.89539	P	1.27406	P	1.10458	P	1.43793	P	0.717579	P	1.89201	1.48767	1.4534	-1.7755
IPF14452.repeat2	--	--	1.22198	P	0.46509	P	1.80817	P	1.47102	P	2.97039	P	1.15046	P	1.47971	3.16288	2.43081	2.47363	1.60933	P	2.79415	P	2.55749	P	2.8467	P	3.36437	P	1.61095	P	2.09054	1.09254	1.76887	-1.58756
IPF14550	orf19.1314	--	1.5616	P	0.596847	P	2.32123	P	2.25647	P	2.28815	P	2.08565	P	1.48644	3.78066	1.46526	3.49444	0.906667	P	3.95726	P	3.27941	P	3.48424	P	4.00805	P	1.48559	P	4.42064	1.2067	3.84291	-2.20748
IPF14683	orf19.7358	--	0.195339	P	0.166667	A	0.401816	P	0.321825	P	0.33713	P	0.270833	P	2.05702	1.93095	1.72587	1.625	0.372	P	0.228346	P	0.144385	P	0.293696	P	0.347126	P	0.118156	A	-1.07166	1.58151	-1.26661	-1.22199
IPF14871	orf19.4132	--	4.49279	P	3.28772	P	4.584	P	6.07337	P	5.49089	P	5.89294	P	1.02235	1.8434	1.44458	1.78583	1.75067	P	3.68048	P	8.02759	P	4.60602	P	5.6378	P	3.99496	P	4.58545	1.53181	3.20974	1.77149
IPF14979	orf19.3482	NAD+ diphosphatase activity	1.31188	P	1.02872	P	1.37741	P	1.68434	P	1.58371	P	1.74248	P	1.05753	1.65421	1.2087	1.69959	1.13333	P	1.49733	P	2.84943	P	3.07307	P	2.20135	P	3.34078	P	2.5142	1.47019	2.32553	1.69322
IPF15015	orf19.5612	--	0.0776915	A	0.01	A	0.103859	P	0.168927	P	0.230638	P	0.249421	P	1.35341	16.8927	3.30679	24.9421	0.124	A	0.324866	P	0.78046	P	0.503582	P	0.48369	P	0.729107	P	6.29403	1.48889	3.25386	2.75735
IPF1505	orf19.348	--	0.670921	P	0.701577	P	0.885358	P	1.04932	P	0.638952	P	0.960648	P	1.31209	1.49207	-1.04951	1.36933	0.348	A	0.859626	P	1.97471	P	1.8159	P	1.26772	P	1.65274	P	5.67446	1.47473	4.41619	2.26292
IPF15160	orf19.6852	--	0.415094	P	0.278153	P	0.743473	P	0.676942	P	0.740319	P	0.828704	P	1.79109	2.4337	1.7835	2.97931	0.114667	A	0.487064	P	0.381016	P	0.727794	P	0.657471	P	0.412104	P	5.73376	1.27833	6.34704	1.08159
IPF15506	orf19.2213	--	0.0477248	A	0.103604	A	0.146425	P	0.181258	P	0.290433	P	0.209491	P	3.0681	4.35019	1.47842	2.02204	0.150667	A	0.111361	A	0.0534759	A	0.0859599	A	0.091954	M	0.103746	A	-1.6385	2.08245	-1.75276	1.94006
IPF15664	orf19.5296	--	0.279689	P	0.780968	P	0.502838	P	0.48582	P	1.79954	P	1.39988	P	1.79784	3.88656	1.83554	1.98867	1.81933	P	2.12092	P	1.70588	P	1.76003	P	2.19655	P	1.95245	P	1.71752	1.3201	1.30158	1.07143
IPF15728	orf19.4721	--	0.279689	P	0.277027	P	0.502838	P	0.48582	P	0.705581	P	0.565394	P	1.79784	3.88656	2.16573	2.27763	0.536	P	0.967914	P	1.85402	P	1.5659	P	1.76153	P	1.41931	P	3.459	1.81992	2.92146	1.46636
IPF15811	orf19.4280	--	0.108768	M	0.305743	A	0.229285	P	0.406905	M	0.578018	P	0.524884	P	2.10802	2.37718	1.63504	1.67977	0.466667	A	0.975816	P	0.951872	P	0.865329	P	1.02816	P	0.842939	A	2.07089	1.07266	1.89678	1.00672
IPF15834	orf19.4675	--	0.266371	P	0.0518018	P	0.392736	P	0.861899	P	0.216401	P	0.247685	P	1.47439	2.48496	2.24112	4.7814	0.442667	A	0.268841	P	0.203209	M	0.207736	P	0.247126	P	0.152738	M	-1.79126	1.32298	-2.13091	-1.33044
IPF16016	orf19.1365	--	1.24195	P	0.783784	P	1.36209	P	1.63009	P	0.907745	P	0.888889	P	1.09673	2.07977	-1.36817	1.1341	0.964	P	0.879679	P	1.7977	P	1.47994	P	1.32621	P	1.39193	P	1.86484	1.50761	1.53521	1.58232
IPF16191	orf19.2630	DNA strand annealing activity	0.402886	P	0.25732	P	0.607264	P	0.674476	P	0.835991	P	0.704861	P	1.50729	4.15927	1.7437	3.08841	0.442	P	0.773903	P	0.558155	P	0.672636	P	0.825287	P	0.49928	P	1.87246	1.3877	1.55012	-1.118
IPF1621	orf19.6585	--	2.10211	P	1.21284	P	4.34506	P	3.77189	P	7.09681	P	3.62153	P	2.067	3.10997	3.37604	2.986	7.13333	P	9.08886	P	12.131	P	12.8754	P	8.98621	P	4.32133	P	1.25975	-1.33471	1.80496	-2.80724
IPF16212	orf19.2710	Enzyme activator activity	0.675916	P	0.531532	P	1.11124	P	1.25771	P	1.48064	P	1.70023	P	1.64405	2.36619	2.19057	3.19874	0.721333	P	2.05737	P	2.23663	P	1.72636	P	2.1977	P	0.782421	P	3.04672	-1.08713	2.39329	-2.8586
IPF16426	orf19.1251	--	0.45616	P	0.275901	P	0.85244	P	0.62762	P	0.701595	P	0.759259	P	1.86873	2.2748	1.53805	2.75193	0.513333	P	0.619798	P	0.425134	P	0.512894	P	0.526437	P	0.455331	P	1.02553	1.45789	-1.00086	1.07103
IPF16795	orf19.2989	--	0.589345	P	0.772523	P	0.496027	P	1.65105	P	0.627563	P	1.62269	P	-1.18813	2.13722	1.06485	2.1005	0.044	A	0.856952	P	1.22529	P	1.12321	P	1.37908	P	1.33141	P	27.8474	1.60928	25.5275	1.55366
IPF16924	orf19.2829	--	1.16648	P	0.441441	P	1.77299	P	1.58816	P	2.68337	P	2.0081	P	1.51994	3.59768	2.3004	4.54896	2.17733	P	2.7649	P	2.90374	P	2.85817	P	2.88621	P	2.72478	P	1.32557	-1.05021	1.31269	-1.06568
IPF17054	orf19.5037	--	0.308546	P	0.263514	M	0.276958	P	0.418002	P	0.215262	P	0.331018	P	-1.11405	1.58627	-1.43335	1.25617	0.182667	M	0.131016	P	0.456322	P	0.373925	P	0.347582	P	0.759366	P	2.49811	2.65297	2.04704	5.79598
IPF17234.3	orf19.1057	--	1.40622	P	1.78378	P	3.26788	P	2.89766	P	2.56036	P	2.97801	P	2.32388	1.62444	1.82075	1.66949	1.892	P	3.5613	P	2.45722	P	3.39971	P	3.65287	P	1.82277	P	1.93069	1.44932	1.79689	-1.34807
IPF18761	orf19.4947	--	3.16648	P	1.79955	M	7.1975	P	2.76449	M	10.5137	M	5.15278	P	2.27303	1.53621	3.3203	2.86337	2.14533	P	1.58943	P	2.06417	P	2.39112	P	1.71149	P	3.78386	P	-1.25349	-1.29869	1.11457	1.83311
IPF19769	orf19.1718	--	0.265261	P	0.170045	P	0.395006	P	0.353884	P	0.427107	P	0.327546	P	1.48912	2.08112	1.61014	1.92623	0.429333	P	0.394826	P	0.308824	P	0.481375	P	0.686207	P	0.292507	P	1.59831	1.27848	1.12122	-1.05578
IPF19953	orf19.5642	--	0.512764	P	4.36149	P	0.905789	P	0.953144	P	9.75569	P	9.64468	P	1.76648	1.68941	1.64662	2.2133	9.758	P	15.378	P	16.8803	P	21.2557	P	16.1943	P	18.6513	P	1.70499	-1.09367	2.22313	1.10228
IPF20014	orf19.5194.1	--	3.97503	P	3.3339	P	4.87174	P	3.87238	P	4.08713	P	4.12211	P	1.27329	1.2116	1.05698	1.30527	1.624	P	1.24733	P	2.47011	P	3.84742	P	2.38245	P	3.76585	P	1.52101	1.91005	1.88642	2.02187
IPF20135	orf19.993	--	2.14262	P	1.52421	P	4.42849	P	2.79038	P	2.58884	P	2.64757	P	1.98044	1.92286	1.21968	1.71674	1.9	P	2.05882	P	3.64828	P	4.99713	P	3.53093	P	6.14553	P	1.92015	1.71502	2.44934	2.59177
IPF2027	orf19.5250	--	0.81798	P	0.451577	P	0.656073	P	1.52281	P	0.817768	P	0.81713	P	-1.24678	3.37221	-1.00026	1.8095	0.498667	M	0.570856	P	1.08391	P	0.803725	P	0.920135	P	0.958213	P	2.17361	1.61185	1.61175	1.67856
IPF2229	orf19.6901	--	0.955605	P	0.563063	P	1.8059	P	0.875462	P	1.64351	P	1.27778	P	1.8898	1.55482	1.71986	2.26933	1.26667	P	1.8369	P	2.48128	P	2.33381	P	2.33908	P	1.0562	P	1.84664	-1.3508	1.84248	-2.34926
IPF2283	orf19.6660	--	1.45838	P	0.795045	P	1.12826	P	1.68434	P	1.22096	P	1.59722	P	-1.29259	2.11855	-1.19446	2.00897	0.608667	P	1.76203	P	5.08793	P	4.08596	P	3.39033	P	2.65418	P	8.84494	1.9368	5.58191	1.62732
IPF2857	orf19.7284	--	0.99889	P	1.72973	P	1.20885	P	3.07522	P	1.15262	P	3.92477	P	1.2102	1.77786	1.1539	2.26901	0.218667	A	0.318182	P	0.893103	P	0.766476	P	0.595051	P	0.891931	P	4.08431	1.87016	3.50522	2.80321
IPF3181	orf19.3558	--	3.34406	P	1.67342	P	5.13053	P	2.65475	P	5.45558	P	4.53357	P	1.53422	1.58642	1.63142	2.70916	3.41067	P	4.40832	P	4.4639	P	6.01862	P	5.45057	P	3.70317	P	1.5981	-1.01261	1.76465	-1.20543
IPF3223	orf19.3577.1	--	2.2475	P	1	P	3.49489	P	3.27127	P	4.32574	P	2.42593	P	1.55501	3.27127	1.92469	2.42593	2.74933	P	2.62655	P	1.47861	P	2.48424	P	3.83333	P	3.11383	P	1.39428	1.77636	-1.10671	2.10592
IPF3239	orf19.2875	Signal recognition particle binding	0.105438	P	0.14527	A	0.202043	P	0.350185	P	0.20615	P	0.290509	P	1.91622	2.41058	1.95517	1.99978	0.664	P	0.301462	P	0.643048	P	0.408309	P	0.432184	P	0.327089	P	-1.53638	-2.1331	-1.62622	-1.96597
IPF3262.3	orf19.3140.1	Proteasome activator activity	3.34961	P	2.07658	P	4.88422	P	6.13194	P	4.73804	P	4.59491	P	1.45815	2.09429	1.46549	2.21273	5.80533	P	10.6119	P	9.92112	P	10.0573	P	10.8333	P	9.20605	P	1.8661	1.06963	1.73242	-1.07767
IPF351	orf19.7531	--	1.61931	P	1.67793	P	2.48808	P	4.97411	P	2.35535	P	4.0625	P	1.53651	2.96443	1.45454	2.42114	2.63867	P	5.4162	P	4.29144	P	6.92407	P	5.72414	P	8.71902	P	2.16933	1.26209	2.62408	2.03172
IPF3594	orf19.3043	Triacylglycerol lipase activity	1.21088	P	1.27365	P	1.12145	P	1.78175	P	0.774487	P	1.24769	P	-1.07974	1.39893	-1.56346	-1.02081	0.350667	A	0.475936	P	0.968966	P	0.977077	P	0.813273	P	1.02594	P	2.76321	1.70879	2.78634	2.15562
IPF3634	orf19.6720	--	1.61709	P	0.975788	P	2.41317	P	2.63995	P	2.14009	P	2.03819	P	1.49229	1.59801	1.75302	2.24406	1.046	P	1.28476	P	4.20632	P	4.01074	P	2.65636	P	3.41499	P	4.10486	2.10373	3.90166	2.66758
IPF373	orf19.7519	--	1.29079	P	0.885135	P	2.1714	P	1.75339	P	2.08656	P	1.72569	P	1.68223	1.98093	1.6165	1.94964	1.18	P	2.38133	P	2.20053	P	2.54584	P	2.39195	P	1.09078	P	2.02708	1.08216	2.1575	-2.0174
IPF3887	orf19.768	--	0.842397	P	0.63964	P	1.34166	P	1.92848	P	1.60137	P	2.52662	P	1.59267	3.01495	1.90096	3.95007	0.862667	P	4.46344	P	3.38235	P	4.9255	P	4.22299	P	2.97406	P	4.89527	1.31963	5.70962	-1.13728
IPF4065	orf19.1862	--	3.84129	P	1.75507	P	2.66913	P	9.7201	P	7.15205	P	10.6256	P	-1.41957	6.11533	2.00382	7.08386	0.325333	P	3.7246	P	12.7489	P	8.03008	P	7.29865	P	8.26729	P	41.7749	1.99516	26.8186	2.10136
IPF409	orf19.7502	--	0.300777	P	0.281531	P	0.120318	P	0.706535	P	0.419134	P	1.2662	P	-2.49985	2.50961	1.39351	4.49756	0.0826667	A	0.61631	P	0.703448	P	0.82235	P	1.04274	P	1.5317	P	8.50945	1.69192	9.94778	2.48528
IPF4119.5	orf19.2959.1	--	17.8147	P	17.8795	P	17.5602	P	25.4797	P	23.615	P	26.0845	P	1.01743	1.46439	1.38044	1.60231	2.99533	P	3.75936	P	13.7172	P	10.8338	P	8.1108	P	16.6938	P	4.79573	2.15317	3.7402	4.48175
IPF4276	orf19.549	Structural constituent of ribosome	1.70144	P	1.44932	P	3.042	P	2.02959	P	4.32574	P	2.90741	P	1.78789	2.28716	1.79425	2.2633	3.402	P	5.53262	P	4.26671	P	4.50931	P	4.96552	P	2.68444	P	1.57121	1.26876	1.46444	-1.61357
IPF4425.repeat2	orf19.2958	--	0.254162	P	0.296171	P	0.261067	P	0.445746	P	0.252847	P	0.388889	P	1.37545	1.53978	1.21107	1.33408	0.306667	A	0.385027	P	0.8	P	0.75788	P	0.607424	P	0.694524	P	2.6087	1.57762	2.23354	1.50274
IPF4667	orf19.1847	Carboxy-lyase activity	1.44562	P	1.61036	P	2.30931	P	3.13995	P	2.11845	P	3.18345	P	1.79334	1.74177	1.52825	2.11459	0.421333	A	0.597594	P	1.90862	P	2.39398	P	1.1198	P	3.66499	P	5.25203	1.88516	6.4217	5.35648
IPF4674	orf19.1852	--	4.90455	P	5.41216	P	6.79342	P	5.24291	P	4.57973	P	4.35301	P	1.38513	-1.03228	-1.07093	-1.24332	1.936	P	2.56818	P	4.05977	P	3.82235	P	3.8099	P	3.817	P	2.09699	1.4835	1.97435	1.48627
IPF4751	orf19.1999	--	2.90233	P	2.03041	P	1.84222	P	5.50432	P	3.38838	P	4.61806	P	-1.57545	2.71094	1.16747	2.27445	2.74933	P	3.56417	P	5.21609	P	5.89685	P	5.42407	P	8.45101	P	1.89722	1.52183	2.14483	2.3711
IPF4935	orf19.7665	--	1.58713	P	1.20721	P	2.48127	P	3.03453	P	3.0205	P	3.51968	P	1.56337	2.51367	1.90313	2.91555	2.248	P	4.27447	P	3.49465	P	4.52722	P	4.08851	P	2.9683	P	1.81873	1.22314	2.01389	-1.17732
IPF4972	orf19.2519	--	0.531632	P	0.451577	P	0.792282	P	1.04439	P	0.85877	P	0.753472	P	1.49028	2.31276	1.61535	1.66854	0.312	P	0.484814	P	0.31016	P	0.494269	P	0.427586	P	0.544669	P	1.37047	1.56311	1.5842	1.75609
IPF4991	orf19.2531	--	2.05383	P	1.22016	P	2.04711	P	3.17078	P	3.00513	P	3.56944	P	-1.00061	2.66489	1.46546	2.96365	0.0886667	A	0.729278	P	2.77874	P	1.63395	P	1.25816	P	1.39914	P	36.7248	1.72099	22.2626	1.90711
IPF4999	orf19.5843	--	0.63263	P	0.759009	P	0.951192	P	1.04192	P	0.949886	P	1.21875	P	1.50355	1.37274	1.50149	1.60571	0.068	A	0.159091	P	0.743678	P	0.604584	P	0.566929	P	2.18156	P	10.9364	3.56355	8.89095	13.7126
IPF5035	orf19.2698	--	1.32963	P	0.76464	P	2.69694	P	1.8545	P	2.50342	P	1.68634	P	2.02833	2.42533	1.88279	2.20541	1.116	P	1.86277	P	1.37567	P	1.53295	P	2.27126	P	0.92219	P	2.03518	1.35408	1.37361	-1.49174
IPF5078	orf19.795	--	0.895671	P	0.117117	P	1.41317	P	0.995068	P	0.258542	P	0.217593	P	1.57777	1.65163	1.51264	1.85791	0.0733333	A	0.163105	P	0.290107	P	0.270774	P	0.251724	P	0.217579	A	3.4326	-1.77866	3.69237	-1.33334
IPF5466	orf19.5683	--	2.96726	P	2.37162	P	5.38082	P	3.17941	P	2.99601	P	3.5191	P	1.78341	1.34417	1.00381	1.48095	4.29467	P	3.29679	P	7.67586	P	9.74857	P	5.37964	P	8.80331	P	1.76609	1.62348	2.24677	2.70044
IPF5972	orf19.7314	--	1.15982	P	0.664414	P	1.1328	P	0.363748	A	0.886105	P	0.559028	P	-1.02385	-1.82658	-1.3089	-1.18852	0.499333	P	0.363636	P	0.864368	P	0.43553	P	0.750844	P	0.391931	M	1.75457	2.1259	1.53356	1.6563
IPF5981	orf19.7310	--	1.53829	P	1.73986	P	1.02043	P	5.01726	P	1.6754	P	5.5706	P	-1.50749	2.88371	1.08913	3.20174	0.1	A	0.129011	A	1.16552	P	0.924069	P	0.384139	P	1.30836	P	15.1808	3.27425	5.63457	6.65749
IPF5988	orf19.7305	--	1.0222	P	1.06419	P	2.07151	P	1.18866	P	2.19248	P	1.64005	P	2.02653	1.97295	1.62053	1.54112	0.514667	P	0.407754	P	2.68448	P	2.22278	P	1.65917	P	1.6232	P	5.21087	4.05579	4.35267	3.96592
IPF6223	orf19.3297	Sturctural constituent of ribosome	1.33518	P	0.658784	P	3.45289	P	1.26387	P	3.87699	P	2.0625	P	2.58608	1.91849	2.90372	3.13077	0.990667	P	2.77278	P	1.92781	P	1.73639	P	3.02874	P	0.455331	P	3.05727	1.43831	1.75275	-4.23386
IPF6274	orf19.6316	--	1.01776	P	0.796171	P	0.934166	P	0.82984	P	0.780182	P	1.1956	P	-1.08948	1.04229	-1.30451	1.50169	0.534667	P	0.612299	P	1.44138	P	0.610315	P	1.04837	P	0.721902	P	2.69585	1.71218	1.65248	1.75319
IPF6305.exon1	orf19.1668	--	0.099889	P	0.153153	P	0.0851305	P	0.276202	P	0.124146	P	0.109954	P	-1.17336	1.80344	1.24284	-1.39289	0.316	A	0.274064	P	0.7	P	0.259312	P	0.661417	P	0.293948	P	2.21519	2.41337	2.06898	1.60491
IPF6308	orf19.1667	Helicase activity	0.147614	P	0.216216	P	0.0942111	P	0.319359	P	0.165148	A	0.277778	P	-1.56684	1.47703	1.11878	1.28472	0.16	A	0.129679	A	0.472414	P	0.308023	P	0.375703	P	0.403458	P	2.95259	2.89717	1.92514	3.1112
IPF6428	orf19.3537	--	0.789123	P	0.643018	P	1.27128	P	1.38594	P	1.00569	P	0.445602	P	1.61101	2.15537	1.27445	-1.44303	0.502667	A	0.522727	P	1.02299	P	0.925501	P	0.993251	P	0.864553	M	2.03512	1.90013	1.84118	1.65393
IPF6474	orf19.4414	--	0.789123	P	0.164414	P	1.27128	P	1.38594	P	0.320046	P	0.362268	P	1.61101	2.15537	1.55033	2.20339	0.241333	P	0.559055	P	0.320856	P	0.39255	P	0.562069	P	0.304035	P	2.32902	1.74239	1.62659	-1.05533
IPF6714	orf19.1412	--	0.681465	P	0.420045	P	1.29171	P	1.02096	P	1.57745	P	1.21875	P	1.8955	2.4306	2.31479	2.90147	0.693333	P	1.98088	P	1.41979	P	1.61175	P	2.02414	P	0.727666	P	2.91943	1.39519	2.32464	-1.95115
IPF6895.3f	orf19.2677	GPI-anchor transamidase activity	0.18646	A	0.245495	P	0.438138	P	0.447596	P	0.321184	P	0.371528	P	2.34978	1.82323	1.72254	1.51338	0.198667	A	0.197975	P	0.292781	P	0.302292	P	0.217241	P	0.380403	P	1.0935	-1.47888	1.52161	1.29928
IPF6930	orf19.3785	Chaperone regulator activity	2.38124	P	0.237613	P	4.38649	P	4.53576	P	0.432802	P	0.364583	P	1.83908	2.4875	1.58518	1.53436	0.253333	P	0.273341	P	0.251337	P	0.280802	P	0.308046	P	0.242075	P	1.21597	1.08755	1.10843	-1.03826
IPF7400	orf19.1802	--	2.38124	P	1.09347	P	4.38649	P	4.53576	P	2.58998	P	4.16667	P	1.83908	2.4875	1.84618	3.8105	2.09467	P	6.45557	P	7.0508	P	6.67192	P	5.98161	P	5.7536	P	2.85564	-1.0922	3.18519	-1.22546
IPF7403	orf19.4664	--	0.976693	P	0.595721	P	0.877412	P	3.78545	P	1.83713	P	3.62153	P	-1.11315	6.3544	1.88097	6.07924	0.830667	P	2.10561	P	3.5	P	3.0616	P	3.33408	P	3.50432	P	4.21348	1.58342	3.68572	1.66428
IPF7527	orf19.4530.1	--	0.905106	P	1.77872	P	0.674801	P	4.66584	P	1.06606	P	4.25058	P	-1.33432	2.63211	1.18307	2.39688	0.566667	A	2.53342	P	2.61839	P	3.06089	P	4.22272	P	9.04539	P	4.62069	1.66681	4.61573	3.78354
IPF7559	orf19.6970	--	2.38124	P	0.237613	P	4.38649	P	4.53576	P	0.872437	P	0.44213	P	1.83908	2.4875	1.95539	1.86072	0.417333	P	0.48144	P	0.5	P	0.530086	P	0.795402	P	0.688761	P	1.90592	-1.03855	1.27017	1.37752
IPF7704	orf19.679	--	0.359046	P	0.297297	P	0.800795	P	0.51233	P	1.11731	P	0.652778	P	2.18982	2.06576	2.07995	2.19571	1.20133	P	0.818898	P	0.632353	P	0.704871	P	0.962069	P	0.416426	P	-1.2487	1.295	-1.70433	-1.51852
IPF7785	orf19.2962	--	0.359046	P	0.0822072	P	0.800795	P	0.51233	P	0.177677	P	0.155093	P	2.18982	2.06576	8.8937	1.88661	0.282667	A	0.0854893	A	0.0668449	A	0.0830946	P	0.149425	A	0.317003	A	-1.89169	1.27892	-3.40175	4.74236
IPF7848	orf19.2558	--	0.359046	P	0.472973	P	0.800795	P	0.51233	P	0.891799	P	0.717593	P	2.18982	2.06576	1.57243	1.5172	0.810667	P	0.859393	P	0.78877	P	0.803725	P	0.941379	P	0.995677	P	1.16124	1.08954	-1.00864	1.26232
IPF8055	orf19.4539	Rho GDP-dissociation inhibitor activity	1.5727	P	1.21171	P	0.84336	P	2.36621	P	1.02392	P	2.21181	P	-1.8648	1.95279	-1.53596	1.82536	0.688	P	1.29545	P	2.27012	P	1.87393	P	2.07986	P	1.82997	P	3.29959	1.60551	1.88397	1.46554
IPF813	orf19.5320	--	0.359046	P	0.60473	P	0.800795	P	0.51233	P	1.40888	P	1.7581	P	2.18982	2.06576	1.77539	2.90725	0.349333	M	2.15973	P	1.24064	P	1.91404	P	2.45287	P	0.863112	P	7.02158	1.74082	5.47912	-1.4374
IPF8307	orf19.6005	Glucose transporter activity	1.00444	P	1.87838	P	0.685585	P	1.76572	P	0.54328	P	1.17708	P	-1.46508	-1.0638	-1.84884	-1.59579	0.111333	A	0.169118	P	0.302299	P	0.315186	P	0.28009	P	0.488473	P	2.45652	1.69322	2.09194	1.78233
IPF8472.3eoc	orf19.5701	Protein binding	0.359046	P	0.15991	P	0.800795	P	0.51233	P	0.464692	P	0.420139	P	2.18982	2.06576	1.49531	2.62735	0.412	P	0.440945	P	0.356952	P	0.429799	P	0.503448	P	0.309798	P	1.22196	1.23531	1.0432	-1.15221
IPF8521	orf19.1260	RNA splicing factor activity, transesterfication mechanism	0.359046	P	0.341216	P	0.800795	P	0.51233	P	1.20615	P	0.709491	P	2.18982	2.06576	1.73601	2.0793	1.252	P	0.953881	P	0.705882	P	1.01146	P	0.958621	P	0.714697	P	-1.30604	1.35133	-1.23781	1.01249
IPF857	orf19.7227	--	2.17148	P	1.68525	P	0.891033	P	3.93588	P	2.69989	P	2.80556	P	-2.36142	2.45052	1.26589	1.72879	0.706667	P	2.14372	P	2.74655	P	1.75072	P	3.3802	P	3.30476	P	3.89597	1.57727	2.81009	1.54236
IPF885	orf19.7214	--	3.82963	P	4.50619	P	3.16288	P	7.34957	P	3.57118	P	7.96817	P	-1.20477	1.66053	-1.07188	1.81369	0.646	P	0.967914	P	1.78046	P	1.52865	P	1.56805	P	1.84798	P	3.41292	1.63416	2.97949	1.86879
IPF9099	orf19.2835	SUMO activating enzyme activity	1.49334	P	0.495495	P	2.43076	P	2.35573	P	1.00797	P	0.811343	P	1.70087	1.87985	1.80553	1.63744	1.02	P	1.13836	P	1.36765	P	1.51433	P	1.54368	P	1.13112	P	1.51341	-1.20142	1.48463	-1.2091
IPF9145	orf19.6245	--	3.74251	P	3.33333	P	2.91941	P	3.5598	P	3.46811	P	2.53935	P	-1.28194	1.06794	-1.07912	-1.31267	0.852	P	1.00936	P	1.8908	P	1.45559	P	1.49381	P	2.03314	P	2.21925	1.47996	1.70844	2.01429
IPF9167	orf19.2737	--	3.46171	P	5.27703	P	4.01589	P	4.37608	P	2.04556	P	5.45486	P	1.16009	-1.20588	-1.69231	1.0337	0.502667	P	0.824866	P	1.42874	P	1.53725	P	1.35321	P	2.21902	P	2.84231	1.64052	3.05819	2.69016
IPF9169	orf19.2736	Transcription corepressor activity	1.49334	P	0.834459	P	2.43076	P	2.35573	P	3.37927	P	1.54861	P	1.70087	1.87985	1.48451	1.85583	0.637333	P	0.915636	P	0.675134	P	1.36676	P	1.31954	P	0.599424	P	2.07041	1.35623	2.1445	-1.1263
IPF931	orf19.7567	--	2.58602	P	3.29617	P	1.02951	P	3.32183	P	2.55809	P	3.69907	P	-2.51189	1.00778	-1.01092	1.12223	1.488	P	2.44786	P	4.16667	P	3.70057	P	3.75591	P	4.77233	P	2.80018	1.53436	2.48694	1.94959
IPF9353	orf19.2378	--	1.49334	P	1.70214	P	2.43076	P	2.35573	P	5.61503	P	3.99942	P	1.70087	1.87985	2.25522	2.35646	4.60333	P	6.75309	P	5.375	P	7.19771	P	7.52586	P	5.20101	P	1.63449	1.25386	1.56363	-1.02605
IPF963	orf19.7553	--	0.0110988	A	0.0574324	A	0.0238366	A	0.0221948	A	0.0569476	A	0.0891204	A	2.14767	-2.58765	5.13098	1.55174	0.04	A	0.105615	M	0.111494	P	0.100287	P	0.260967	P	0.32853	P	2.78736	2.47093	2.50716	3.11064
IPF9706	orf19.4883	--	0.45727	P	0.396396	P	0.284904	P	0.38471	M	0.258542	P	0.46875	P	-1.605	-1.03038	-1.76865	1.18253	0.129333	A	0.219251	P	0.416092	P	0.396848	P	0.502812	P	0.43804	P	3.21721	2.29331	3.06841	1.99789
IPF993	orf19.4595	--	2.02997	P	0.753378	P	3.94495	P	3.49137	P	2.37699	P	2.10648	P	1.94433	2.3181	1.62617	2.79605	1.36267	P	3.09336	P	3.14572	P	3.78797	P	3.55402	P	1.99856	P	2.60814	-1.01693	2.77982	-1.574
KRE2.5f	orf19.4349.6	--	0.503885	P	0.697072	P	0.474461	P	0.526511	P	0.783599	P	0.884259	P	-1.06202	-1.32395	1.55512	1.26853	0.448	P	0.410428	P	0.735632	P	0.691977	P	0.622047	P	1.04755	P	1.64204	1.51561	1.54459	2.55234
MAK3	orf19.4617	Amino-acid N-acetyltransferase activity	2.32852	P	1.26126	P	4.67083	P	5.09741	P	4.8508	P	4.1713	P	2.00592	4.04152	2.08321	3.30724	3.316	P	7.00675	P	6.9893	P	10.5186	P	9.05172	P	6.31412	P	2.72971	1.0025	3.17208	-1.10693
MEP2	orf19.5672	Ammonium transporter activity	1.04218	P	1.12275	P	2.48695	P	2.0185	P	0.457859	P	0.732639	P	2.3863	1.79782	-2.27619	-1.53247	0.642667	P	0.493316	P	1.58736	P	2.08453	P	1.03487	P	2.02305	P	2.46995	2.09779	3.24356	4.10093
MEP3	orf19.1614	Ammonium transporter activity	5.44895	P	4.65541	P	6.17877	P	4.90444	P	4.74089	P	4.93287	P	1.58905	1.17665	1.46206	1.69856	0.805333	P	1.48262	P	3.14138	P	5.56662	P	3.54893	P	5.25865	P	3.90072	2.39369	3.45533	1.69318
MET14	orf19.946	Adenylylsulfate kinase activity	1.71143	P	2.34065	P	3.99319	P	1.44636	P	6.59225	P	4.12442	P	2.33324	2.03545	1.99236	1.7655	5.928	P	5.16423	P	4.19519	P	6.34456	P	5.97816	P	6.73847	P	1.02726	1.24264	1.08859	1.62252
MET16	orf19.3106	Phosphoadenylyl-sulfate reductase (thioredoxin) activity	0.481687	P	0.927928	M	0.971623	P	1.03822	P	1.75285	P	1.63773	P	2.01713	2.02181	1.5985	1.76493	1.26533	P	0.933633	P	1.01738	P	0.792264	P	0.654023	P	1.64841	P	-1.93469	-1.0897	-1.59711	1.62026
MET3	orf19.5025	Sulfate adenylyltransferase (ATP) activity	0.481687	P	0.640766	M	0.971623	P	1.03822	P	2.30979	P	1.30093	P	2.01713	2.02181	2.17919	2.03027	4.35067	P	2.009	P	2.39706	P	2.22493	P	1.65747	P	1.2219	P	-2.62488	-1.19316	-1.95542	-1.96174
MNT4	orf19.4475	Mannosyltransferase activity	1.53274	P	1.66216	P	2.75936	P	3.00863	P	2.61503	P	3.68866	P	1.80028	1.81007	1.70612	2.21919	1.11467	P	1.82002	P	1.25936	P	2.44126	P	2.86782	P	2.09366	P	2.5728	1.4452	2.19013	1.66248
MRF1	orf19.1149	DNA binding	1.40011	P	2.67286	P	1.22701	P	2.15536	P	1.41856	P	3.71238	P	-1.17635	-1.17701	1.01313	1.45978	0.413333	P	0.727941	P	1.17529	P	1.25072	P	1.3847	P	1.63977	P	2.97395	1.8852	3.05279	2.24247
MRP1.3f	orf19.1662	Structural constituent of ribosome	2.43285	P	2.03153	P	3.68672	P	3.97781	P	4.57062	P	3.50926	P	1.51539	1.95803	1.87871	1.7274	3.052	P	3.89539	P	3.32086	P	4.59456	P	4.38851	P	3.85158	P	1.43791	1.17301	1.50542	1.15982
MRP7	orf19.7203	Peptidyltransferase activity	1.57159	P	1.10248	P	3.10556	P	1.76572	P	3.36446	P	1.90509	P	1.97607	1.60159	2.14081	1.72801	2.98667	P	3.0225	P	3.23128	P	4.4298	P	3.27241	P	2.71758	P	1.09567	-1.06908	1.48319	-1.18903
MRPL11	orf19.3797	Sturctural constituent of ribosome	0.445061	P	0.467342	P	1.8286	P	0.713933	P	0.736902	P	0.711805	P	4.10866	1.52765	1.65573	1.52309	0.721333	P	1.88414	P	0.808824	P	1.47994	P	1.47471	P	0.68732	P	2.04443	2.32948	2.05168	-1.17678
MRPL49	orf19.5161	Structural constituent of ribosome	3.28635	P	1.49437	P	5.63791	P	3.08015	P	5.71298	P	3.38079	P	1.71555	2.06117	1.7384	2.26235	6.14933	P	6.07087	P	7.12968	P	9.38109	P	6.63563	P	4.4366	P	1.07908	-1.17441	1.52555	-1.60701
NHP2	orf19.526	--	2.49501	P	1.33896	P	4.15323	P	2.73736	P	4.96811	P	2.50694	P	1.66462	2.04439	1.99122	1.8723	6.72133	P	8.75366	P	8.43449	P	8.82521	P	9.14713	P	8.18012	P	1.36091	1.03784	1.31302	-1.0311
NIF3	orf19.4406	--	2.49501	P	1.31532	P	4.15323	P	2.73736	P	2.35535	P	2.81829	P	1.66462	2.04439	1.905	2.14267	1.98267	P	2.50731	P	2.19519	P	2.73066	P	2.15632	P	2.50288	P	1.08759	1.14219	1.37727	1.14017
OST2	orf19.1761	Dolichyl-diphosphooligosaccharide-protein glycotransferase activity	0.630411	P	0.402027	P	1.22247	P	0.58693	P	1.01936	P	0.913194	P	1.93917	1.45993	1.61698	2.27148	0.508	P	1.60405	P	1.06417	P	1.51862	P	1.3069	P	0.716138	P	2.57263	1.50732	2.98942	-1.48599
PAD1	orf19.5731	Carboxy-lyase activity	0.610433	P	1.01351	P	0.828604	P	0.774353	P	0.58656	P	0.590278	P	1.3574	-1.30885	-1.0407	-1.71701	0.246667	A	0.140374	A	0.48046	P	0.385387	P	0.462317	P	0.657061	P	1.94781	3.29346	1.56238	4.68077
PBI2	orf19.2769	Endopeptidase inhibitor activity	0.865705	P	0.708333	P	0.911464	P	2.1307	P	1.40661	P	1.38194	P	1.05286	3.00805	1.62481	1.95098	2.57333	P	3.37166	P	11.2494	P	8.92407	P	5.80203	P	8.28819	P	4.37154	1.72082	3.4679	2.45819
PST2	orf19.5285	--	1.399	P	1.16329	P	1.80874	P	1.63379	P	1.07859	P	1.1331	P	1.57697	1.59089	-1.09798	1.03983	0.774	P	0.566845	P	1.43506	P	1.18768	P	1.01012	P	1.62824	P	2.08046	1.79542	1.55659	3.16876
QCR9	orf19.2707.1	Ubiquinol-cytochrome-c reductase activity	0.168701	P	0.0855856	A	0.339387	P	0.221948	P	0.530752	P	0.310185	P	2.01176	2.59329	3.1461	3.62427	0.114667	A	0.343082	P	0.209893	P	0.336676	P	0.511494	P	0.0489914	A	4.46071	1.63456	2.93613	-4.28429
RAD2	orf19.1324	Single-stranded DNA specific endodeoxyribonuclease activity	0.538291	P	0.157658	P	0.960272	P	1.03576	P	0.382688	P	0.304398	P	1.78393	1.60236	2.07712	1.93075	0.128	A	0.51856	P	0.463904	P	0.448424	P	0.533333	P	0.167147	A	4.16667	1.11782	3.50331	-2.77542
RBT7	orf19.2681	Ribonuclease activity	0.130966	A	0.195946	A	0.422247	P	0.726264	P	0.378132	P	0.40625	P	3.22411	3.70645	2.88726	2.07328	0.36	A	0.782902	P	0.57754	P	0.603152	P	1.14483	P	1.02882	P	3.18008	1.35558	1.67542	1.78138
RIM1	orf19.2483	--	6.10433	P	4.18018	P	8.91146	P	6.94945	P	9.03986	P	7.67361	P	1.45986	1.66248	1.48089	1.83571	7.49733	P	8.98088	P	8.32219	P	12.6003	P	9.97127	P	7.10663	P	1.32997	1.07915	1.68064	-1.17105
RNA1	orf19.1649	--	1.29967	P	0.511261	P	2.49943	P	0.893958	P	2.06264	P	1.31597	P	1.92313	1.74853	1.58705	2.57397	1.516	P	2.7604	P	3.2861	P	3.16762	P	3.30115	P	1.64697	P	2.17754	-1.19044	2.08946	-1.99523
RPB9	orf19.2276	DNA-directed RNA polymerase activity	4.51498	P	1.94144	P	7.08513	P	3.30949	P	9.2369	P	4.94907	P	1.56925	1.70466	2.04583	2.54918	5.05733	P	8.09674	P	7.28209	P	8.91118	P	8.85172	P	5.07205	P	1.75027	1.11187	1.76203	-1.43573
RPO26	orf19.2643	DNA-directed RNA polymerase activity	2.05882	P	1.09459	P	3.21112	P	1.77065	P	3.63098	P	1.89236	P	1.55969	1.61763	1.76362	1.72882	2.96133	P	2.16648	P	2.00401	P	1.86533	P	1.28276	P	1.84294	P	-2.30857	1.08107	-1.58757	-1.0874
RPS7A	orf19.1700	Structural constituent of ribosome	14.3929	P	8.42342	P	20.975	P	12.8644	P	25.0957	P	18.7072	P	1.45732	1.52721	1.74361	2.22085	19.184	P	22.6524	P	33.5628	P	39.543	P	21.1184	P	19.3631	P	1.10083	-1.48164	2.06125	-1.73334
SAP7	orf19.756	Aspartic-type endopeptidase activity	2.70255	P	1.81419	P	6.92509	P	1.58446	P	1.76424	P	1.69444	P	2.56242	-1.14499	-1.53185	-1.07067	0.512	P	0.294118	P	0.821839	P	0.954155	P	0.661417	P	0.525937	P	1.60515	2.24882	1.86358	1.78818
SNU114	orf19.144	ATP-dependent RNA helicase activity	0.229745	P	0.216216	P	0.374574	P	0.393342	M	0.463554	P	0.353009	P	1.63039	1.8192	2.01769	1.63267	0.753333	P	0.31946	P	0.435829	P	0.452722	P	0.357471	P	0.9683	P	-2.1074	-1.36427	-1.66401	2.22174
SOU1	orf19.2896	2,4-dienoyl-CoA reductase (NADPH) activity	6.17259	P	6.0518	P	12.038	P	11.4088	P	7.71014	P	6.9456	P	1.94396	1.76658	1.24203	1.11438	0.184667	A	0.286096	A	2.28736	P	1.08883	P	1.3099	P	1.51225	P	13.1452	4.99818	5.67131	5.60404
SPC2	orf19.4181	Protein binding	3.50388	P	1.86036	P	5.1748	P	5.89766	P	5.51595	P	4.80556	P	1.47688	3.17017	1.57424	2.58313	3.27067	P	5.60967	P	4.14572	P	6.29799	P	7.05172	P	4.45101	P	2.15605	1.35312	1.9256	1.07364
SPT4	orf19.3947	RNA polymerase II transcription elongation factor activity	4.01887	P	1.7973	P	6.1975	P	4.67571	P	6.34738	P	4.01389	P	1.5421	2.60152	1.57939	2.23329	3.68133	P	6.66367	P	5.59759	P	6.43123	P	7.87586	P	4.35159	P	2.1394	1.19045	1.74698	-1.28633
SRB2.3	orf19.2711.1	RNA polymerase II transcription mediator activity	0.710322	P	0.289414	P	1.89217	P	0.67201	P	1.11048	P	0.847222	P	2.66382	2.32196	1.56335	2.92737	0.510667	P	1.05737	P	0.786096	P	0.964183	P	1.16782	P	0.419308	P	2.28685	1.34509	1.88809	-1.87474
SUL1	orf19.2738	Sulfate transporter activity	0.491676	P	0.333333	P	1.83655	P	1.93342	P	0.644647	P	0.90625	P	3.73528	5.80025	1.31112	2.71875	0.590667	P	0.473262	P	0.905747	P	1.11748	P	0.815523	P	1.02161	P	1.53343	1.7232	1.89189	2.15866
TIM13	orf19.2754	Protein transporter activity	1.23085	P	0.628378	P	1.87628	P	2.49075	P	2.87244	P	1.18287	P	1.52437	3.96378	2.33369	1.88242	2.63733	P	1.70866	P	1.08289	P	1.47851	P	1.26437	P	0.809798	A	-2.08589	1.57788	-1.78378	-1.33723
TOA1	orf19.2682	General RNA polymerase II transcription factor activity	1.1687	P	0.878378	P	2.75369	P	1.51541	P	1.98064	P	1.49306	P	2.3562	1.72524	1.69473	1.69979	1.164	P	1.42745	P	2.28743	P	2.34527	P	1.51149	P	0.737752	P	1.29853	-1.60246	2.01484	-3.10054
UBC9	orf19.6424	--	0.870144	P	0.707207	P	1.35755	P	1.35758	P	1.47267	P	1.45602	P	1.56014	1.91964	1.69244	2.05883	1.45467	P	2.04499	P	1.91845	P	2.38539	P	1.72069	P	2.16138	P	1.18288	1.06596	1.63982	1.12663
UGA11.exon2	orf19.854	4-aminobutyrate transaminase activity	0.414539	P	0.556869	P	0.664586	P	0.303329	A	0.322893	P	0.342014	P	1.63897	-1.57528	-1.36515	-1.42093	0.384667	A	0.256684	P	0.786782	P	0.654011	P	0.681665	P	1.12464	P	2.1371	2.6373	1.71947	3.99323
UTR4	orf19.1495	--	0.478357	P	0.209459	P	0.807037	P	0.309494	P	0.964692	P	0.498843	P	1.6871	1.47759	2.01668	2.38157	0.253333	A	0.350956	P	0.490642	P	0.43553	P	0.378161	P	0.221902	A	1.49274	-1.39801	1.7192	-2.21107
VMA2	orf19.6634	Hydrogen ion transporting ATPase activity, rotational mechanism	1.13873	P	0.765766	P	2.02951	P	1.23305	P	1.65945	P	1.85532	P	1.78225	1.61021	1.45728	2.42284	4.11667	P	6.28909	P	6.14706	P	7.22636	P	6.8069	P	5.99135	P	1.66201	1.02568	1.75504	-1.01816
VMA21	orf19.4090.1	--	2.84018	P	1.84234	P	4.4336	P	4.38964	P	6.10478	P	6.12326	P	1.56103	3.14102	1.85914	3.42653	1.37333	P	1.30596	P	1.67914	P	1.62178	P	1.32299	P	0.963977	P	-1.03805	-1.28575	1.18091	-1.74189
VMA7	orf19.806	Hydrogen ion transporting ATPase activity, rotational mechanism	2.78801	P	1.61374	P	4.89557	P	3.51541	P	5.65376	P	4.94676	P	1.75594	2.17843	2.02788	3.0654	3.71067	P	7.03375	P	5.90508	P	8.25501	P	7.04368	P	4.09366	P	1.89822	1.19113	2.22467	-1.44249
VTC2	orf19.4381	--	5.72364	P	7.81869	P	7.00795	P	10.6153	P	6.52506	P	5.8206	P	1.22439	1.35768	1.14002	-1.34328	5.02133	P	4.36765	P	9.42069	P	7.55014	P	7.47244	P	9.49279	P	1.87613	1.71086	1.50361	2.17343
