# Supplementary material for: The Transcription Factor Mrr1p Controls Expression of the MDR1 Efflux Pump and Mediates Multidrug Resistance in Candida albicans
Source: PLOS journal article supplement (doi:10.1371/journal.ppat.0030164), 2007-10-29
Supplement: S5 (10.1371/journal.ppat.0030164.s005) [file journal.ppat.0030164.s005]

**Table S5: Primers used in this study**

| Primer | Sequence a |
| --- | --- |
| ZCF36-1 | 5`-TCTAAGTCGACAAAAATGTCAATTGCCACCACCC-3` |
| ZCF36-2 | 5`-GCCAATTCACCAGATCTAATTTAATTGG-3` |
| ZCF36-3 | 5`-GAATAATTCGGAGCTCAATTTGCGTTTAGCC-3` |
| ZCF36-4 | 5`-GGTGTTTCTATAGCCGCGGTGGCAATTGAC-3` |
| ZCF36-5 | 5`-TAACACTCGAGAAGCTGATCTTAGTTCATTTG-3` |
| ZCF36-6 | 5`-ATATTGGGCCCGCTACCATAAGCCTCGCTCG-3` |
| ZCF36-7 | 5`-CCAAATGCATTGATTCTGGTGAATTGGCAGC-3` |
| ZCF36-8 | 5`-AATCGGATCCATTGGTAAAAAGTTGATCAAATGG-3` |
| ZCF36seq1 b | 5`-ATTACAATGTGTCCCACACACG-3` |
| ZCF36seq2 b | 5`-CAGTTTACTTTATCCATTTATGCC-3` |
| ZCF36seq3 b | 5`-AGTTCCATTTATAGAAGAAGGC-3` |
| ZCF36seq4 b | 5`-GTTGGAATTGCAGCTGTATCC-3` |
| ZCF36seq5 b | 5`-CCCTTGGTAATCTTCCACGC-3` |
| ZCF36seq6 b | 5`-CATCCTTGTATTCCGTTTCACC-3` |
| ZCF36seq7 b | 5`-GAAGTCACTATTACGTTGAGTG-3` |
| ZCF36seq8 b | 5`-CTTGATTGATAAGAGTTTGGATC-3` |
| MDR1F | 5`-ACATAAATACTTTGCCCATCCAGAA-3` |
| MDR1R | 5`-AAGAGTTGGTTTGTAATCGGCTAAA-3` |
| 18SF | 5`-CACGACGGAGTTTCACAAGA-3` |
| 18SR | 5`-CGATGGAAGTTTGAGGCAAT-3` |

a Restriction sites introduced into the primers are underlined.

b Primers used for sequencing of PCR-amplified *MRR1* fragments
